# Supplementary material for: Boroxine template for macrocyclization and postfunctionalization
Source: Royal Society of Chemistry journal article supplement (doi:10.1039/d2cc04691a), 2022-01-01
Supplement: d2cc04691a1.pdf [file d2cc04691a1.pdf]

## Supporting Information

### Boroxine Template for Macrocyclization and Postfunctionalization

Kosuke Ono,<sup>a\*</sup> Satoru Onodera<sup>b</sup> and Hidetoshi Kawai<sup>b</sup>

School of Science, Tokyo Institute of Technology,

O-okayama, Meguro-ku, Tokyo 152-8551, Japan<sup>a</sup>

Faculty of Science, Tokyo University of Science

Kagurazaka, Shinjuku-ku, Tokyo 162-8601, Japan<sup>b</sup>

\*e-mail: k.ono@chem.titech.ac.jp

#### Table of Contents

|                                                                                 |     |
|---------------------------------------------------------------------------------|-----|
| 1. General Methods .....                                                        | S2  |
| 2. Synthesis of Macrocyclic <b>4</b> .....                                      | S3  |
| 3. Control Experiments.....                                                     | S30 |
| 4. Post-modification of Macrocycles.....                                        | S36 |
| 5. Synthetic Procedure and Characterization of New Compounds.....               | S54 |
| 6. <sup>1</sup> H NMR, <sup>13</sup> C NMR and <sup>11</sup> B NMR Spectra..... | S57 |
| 7. X-ray Crystallographic Analysis of <b>3c</b> .....                           | S64 |
| 8. References .....                                                             | S66 |

## 1. General Methods

$^1\text{H}$  NMR spectra were recorded on a Bruker BioSpin AVANCE DPX-400 (400 MHz) spectrometer and Bruker BioSpin AVANCE III (400 MHz) spectrometer and  $^{13}\text{C}$  NMR spectra were recorded on a Bruker BioSpin AVANCE 400 M (100 MHz) spectrometer using residual  $\text{CHCl}_3$  ( $^1\text{H}$ , 7.26 ppm), DMSO ( $^1\text{H}$ , 2.50 ppm), or DMSO- $d_6$  ( $^{13}\text{C}$ , 39.5 ppm) as an internal standard. All NMR spectra were recorded at 303 K unless otherwise noted.  $^{11}\text{B}$  NMR spectra were recorded on a JEOL ECX-500 (160 MHz) spectrometer using  $\text{BF}_3 \cdot \text{Et}_2\text{O}$  (0.00 ppm) as an external standard. High-resolution mass analysis (MALDI<sup>+</sup>) was performed on a JEOL JMS-S3000 mass spectrometer using DCTB (*trans*-2-[3-(4-*tert*-Butylphenyl)-2-methyl-2-propenylidene]malononitrile), DHB (2,5-dihydroxybenzoic acid) and Dithranol as matrix. IR spectra were recorded on a JASCO FT/IR-4600 plus spectrometer. The X-ray analysis data were obtained using a Rigaku R-Axis RAPID charge-coupled device (CCD) apparatus (Cu  $\kappa$   $\alpha$  radiation,  $\lambda = 1.54178 \text{ \AA}$ ). Preparative recycling gel permeation chromatography (GPC) was carried out on a JAI LC-908 equipped with JAIGEL -1HH and -2HH columns ( $\text{CHCl}_3$  as an eluent; flow rate: 5.5 mL/min). All reactions except the catalytic hydrogen reduction were carried out under Ar unless otherwise noted. Tetrahydrofuran (THF) was purified by solvent purification system of Glass-Contour. Activated molecular sieves  $4 \text{ \AA}$  (MS 4A) was added 5 mg per 1 ml of solvent. All commercially available compounds were used without further purification unless otherwise indicated. Dehydrated dichloromethane was purchased from Kanto Chemical Co., Inc. 5-bromo-1-pentene was purchased from Kanto Chemical Co., Inc, 6-bromo-1-hexene was purchased from Oakwood Products, Inc, 7-bromo-1-heptene was purchased from Combi-Blocks, Inc. 5-bromoresorcinol<sup>S1</sup> and 3,5-bis(pent-5-en-1-yloxy)phenylboronic acid (**1a**)<sup>S2</sup> were prepared according to the literature procedures.

## 2. Synthesis of Macrocycle 4

### 2-1. Boroxine Formation from Boronic acid **1a** to **2a**

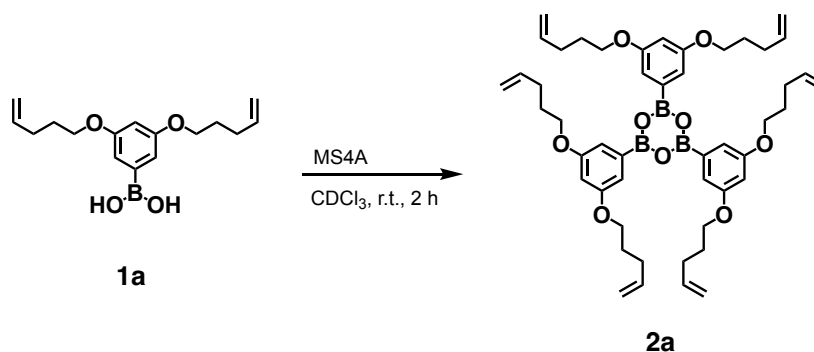

To a CDCl<sub>3</sub> (600  $\mu$ L) solution of boronic acid **1a** (1.76 mg) in an NMR tube was added MS4A. After standing at room temperature for 2 h, <sup>1</sup>H NMR spectrum of the solution revealed the quantitative formation of boroxine **2a**.

Physical data of **2a**

<sup>1</sup>H NMR (400 MHz, CDCl<sub>3</sub>):  $\delta$  7.33 (d,  $J$  = 2.3 Hz, 6H), 6.69 (t,  $J$  = 2.3 Hz, 3H), 5.89 (ddt,  $J$  = 17.0, 10.2, 6.6 Hz, 6H), 5.10 (dq,  $J$  = 17.0, 1.6 Hz, 6H), 5.05-5.02 (m, 6H), 4.07 (t,  $J$  = 6.5 Hz, 12H), 2.32-2.26 (m, 12H), 1.94 (quin,  $J$  = 6.9 Hz, 12H).

<sup>13</sup>C NMR (100 MHz, CDCl<sub>3</sub>):  $\delta$  160.2, 137.9, 115.4, 113.8, 106.0, 67.5, 30.3, 28.6. The boron-bound carbons were not detected due to quadrupole relaxation.

<sup>11</sup>B NMR (160 MHz, CDCl<sub>3</sub>):  $\delta$  30.2

HRMS (MALDI<sup>+</sup>):  $m/z$  calcd. for C<sub>48</sub>H<sub>63</sub>B<sub>3</sub>O<sub>9</sub>Na: 839.4666, found: 839.4651 [M+Na]<sup>+</sup>.

IR (ATR): 3077, 2920, 2872, 1641, 1585, 1433, 1332, 1297, 1162, 1057, 991, 908, 847, 725, 680 cm<sup>-1</sup>.

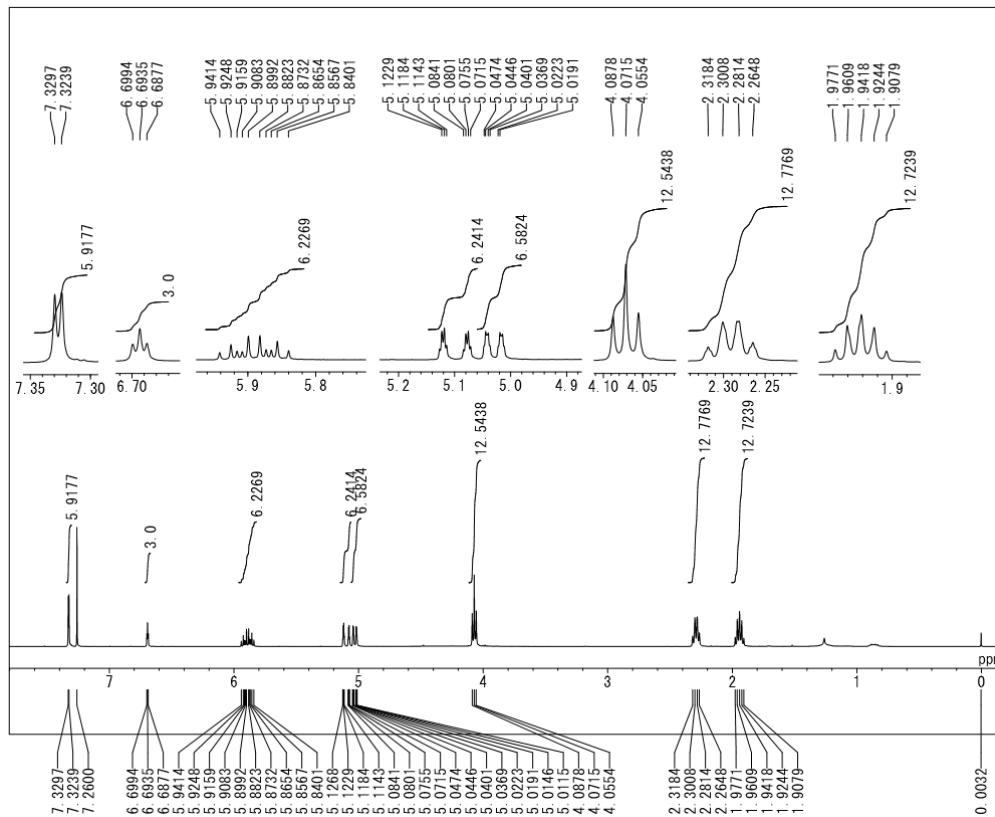

DFILE C:\Users\sator\OneDrive\修論データ\spectrol\13C boroxine 体\C5 boroxine 1H (S0330).rm1  
 DATIM 16/Dec/2019 19:32:41  
 COMNT

OBNUC <sup>1</sup>H  
 EXMOD ZG30  
 OBFRQ 400.13 MHz  
 OBSET 0.0 kHz  
 OBFIN 10003.76 Hz  
 POINT 65536  
 FREQU 8196.722 Hz  
 SCANS 16  
 ACQTM 7.9954 s  
 IRNUC OFF  
 PROBHD Z163739\_0101 (PI HR-400 -S1-BBF/H)  
 INSTRUM AVANCE  
 PULSPRG ZG30  
 GRDPROG  
 CTEMP 30.0027 °C  
 SLVNT CDCl<sub>3</sub>  
 BF 0.25 Hz  
 RGAIN 101

<sup>1</sup>H NMR

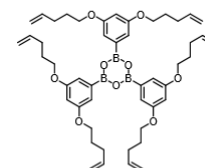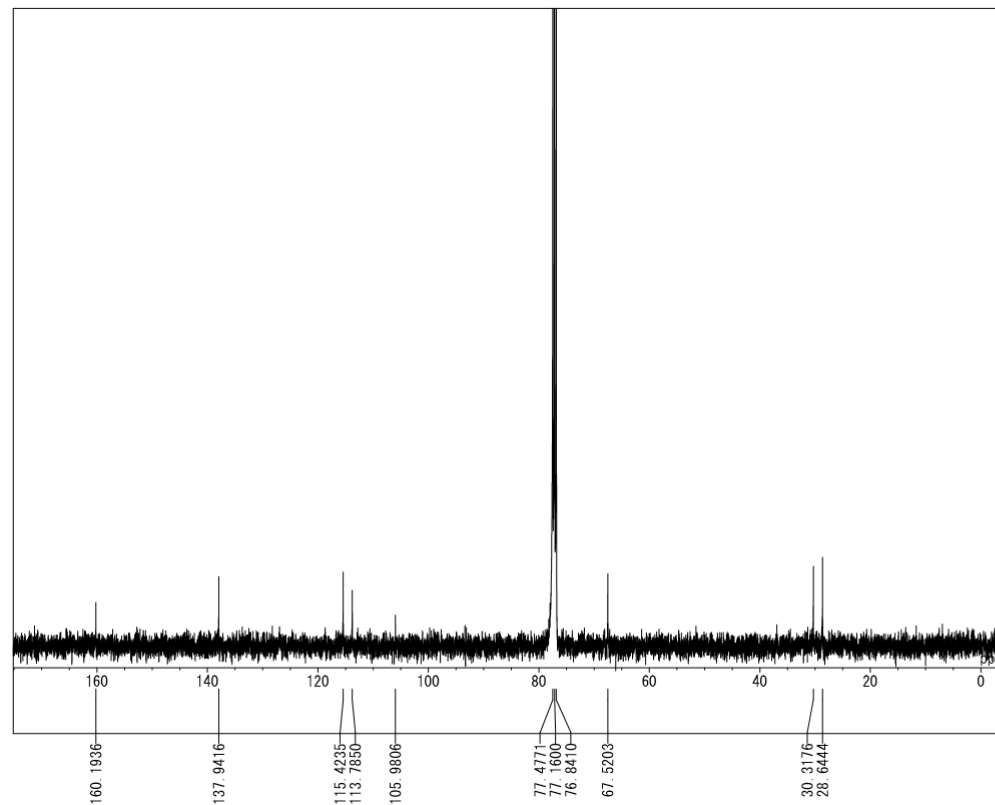

DFILE C:\Users\SATOR\ONE\DRIVE\修論データ\spectrol\13C BOROXINE 体\C5 BOROXINE 13C (S0330).RM1  
 DATIM 17/Dec/2019 09:52:05  
 COMNT

OBNUC <sup>13</sup>C  
 EXMOD ZGPC30  
 OBFRQ 100.63 MHz  
 OBSET 0.0 kHz  
 OBFIN 9999.209 Hz  
 POINT 32768  
 FREQU 24038.46 Hz  
 SCANS 1024  
 ACQTM 1.3631 s  
 IRNUC OFF  
 PROBHD 5 MM PABBO BB-1H/D Z-GRD Z104450  
 INSTRUM SPECT  
 PULSPRG ZGPC30  
 GRDPROG  
 CTEMP 26.85 °C  
 SLVNT CDCl<sub>3</sub>  
 BF 0.25 Hz  
 RGAIN 64

<sup>13</sup>C NMR

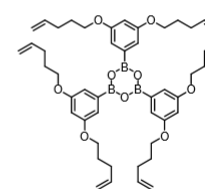

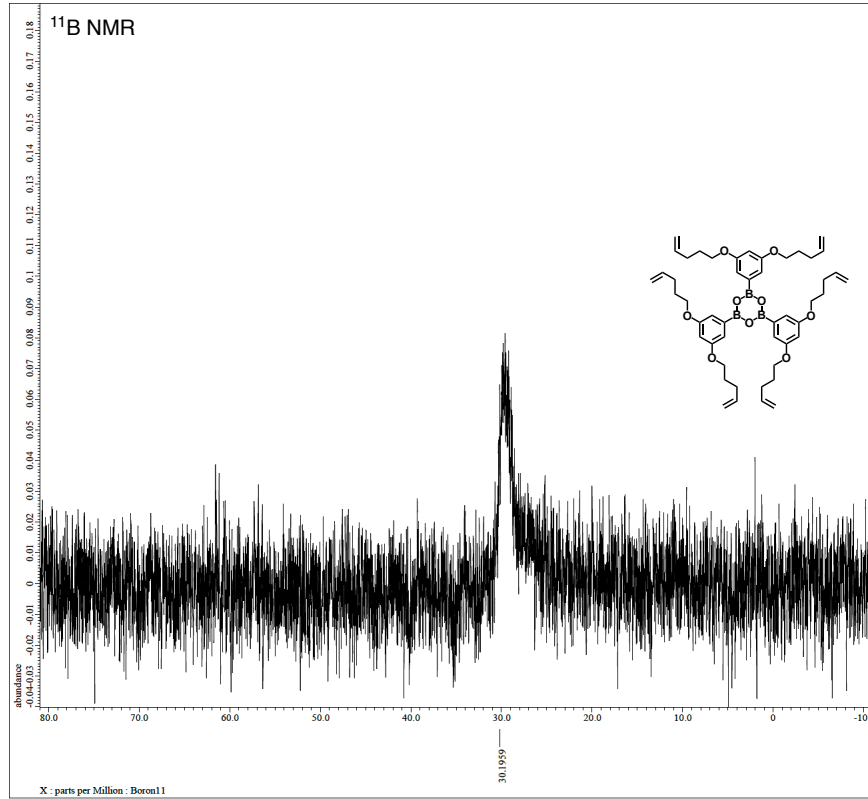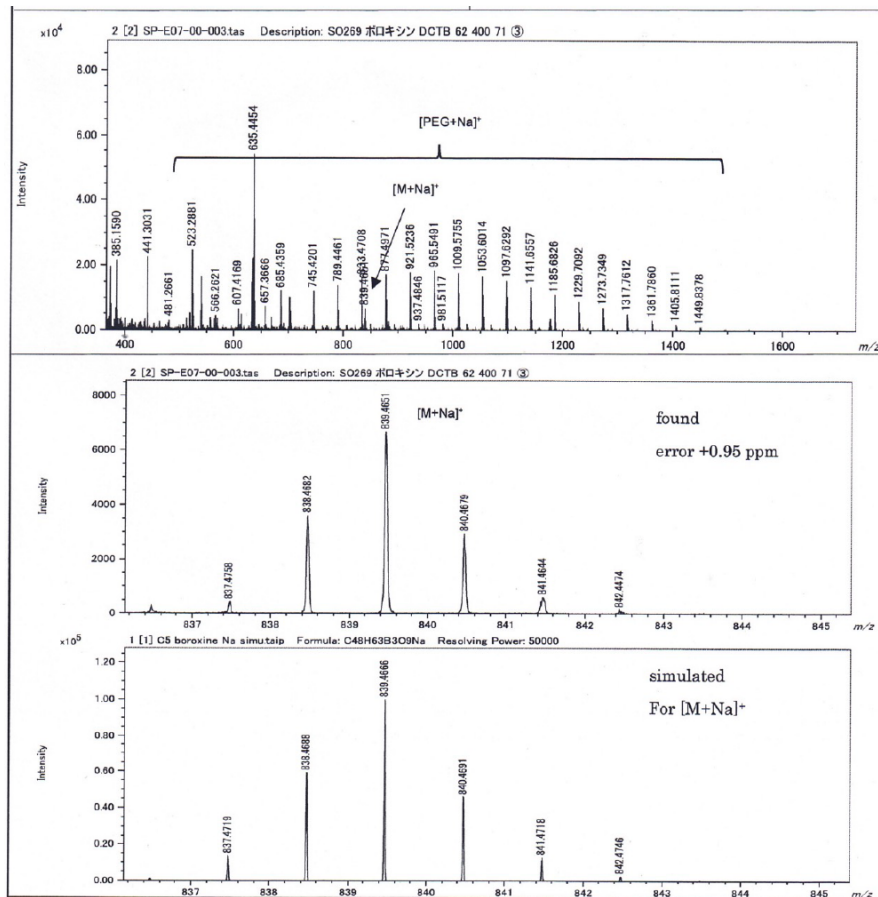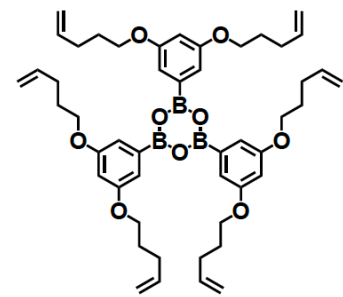

## 2-2. Synthesis of Macrocycle **4a**

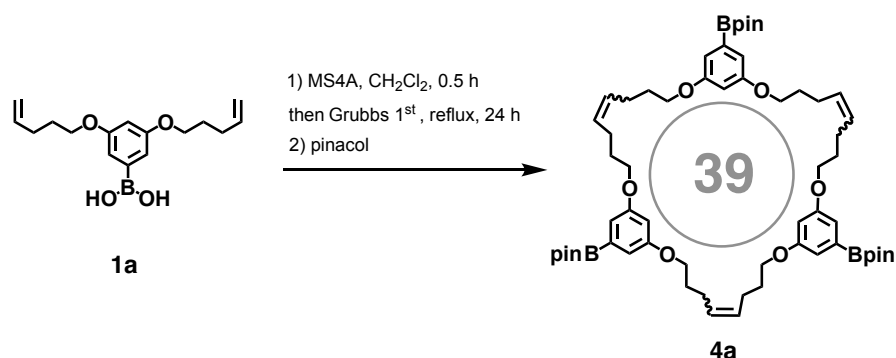

Boronic acid **1a** (69.0 mg, 0.238 mmol) was dissolved in dichloromethane (159 mL) with MS4A and the solution was stirred at room temperature for 0.5 h. Then Grubbs 1<sup>st</sup> Generation catalyst (19.6 mg, 23.8  $\mu$ mol) was added and the resulting mixture was refluxed for 24 h under Ar. The reaction was quenched with ethyl vinyl ether (200  $\mu$ L) and the solvent was evaporated to crude **3a**. The crude was treated with pinacol (28.1 mg, 0.238 mmol) in a mixture of methanol and chloroform and MS4A was removed by filtration. The filtrate was evaporated and the resulting crude product was purified by GPC to afford the desired **4a** (26.4 mg, 32%).

Physical data of **4a** (mixture of *cis/trans* isomers)

<sup>1</sup>H NMR (400 MHz, CDCl<sub>3</sub>):  $\delta$  6.92-6.90 (m, 6H), 6.54-6.53 (m, 3H), 5.46-5.42 (m, 6H), 3.97-3.89 (m, 12H), 2.20-2.13 (m, 12H), 1.81-1.74 (m, 12H), 1.32 (s, 36H).

<sup>13</sup>C NMR (100 MHz, CDCl<sub>3</sub>):  $\delta$  160.0, 130.4, 130.3, 130.2, 129.9, 129.8, 129.7, 113.1, 112.9, 112.8, 112.7, 112.6, 112.5, 112.5, 112.3, 105.2, 105.2, 105.1, 105.0, 83.9, 67.3, 67.2, 67.2, 67.2, 29.4, 29.3, 29.3, 29.2, 29.2, 29.2, 29.1, 29.0, 29.0, 28.9, 25.0, 23.8, 23.8, 23.7. The boron-bound carbons were not detected due to quadrupole relaxation.

<sup>11</sup>B NMR (160 MHz, CDCl<sub>3</sub>):  $\delta$  29.7

HRMS (MALDI<sup>+</sup>): *m/z* calcd. for C<sub>60</sub>H<sub>87</sub>B<sub>3</sub>O<sub>12</sub>Na: 1055.6396, found: 1055.6317 [M+Na]<sup>+</sup>.

IR (ATR): 2977, 2931, 2871, 1716, 1586, 1469, 1429, 1362, 1308, 1164, 1146, 1056, 969, 851, 706 cm<sup>-1</sup>.

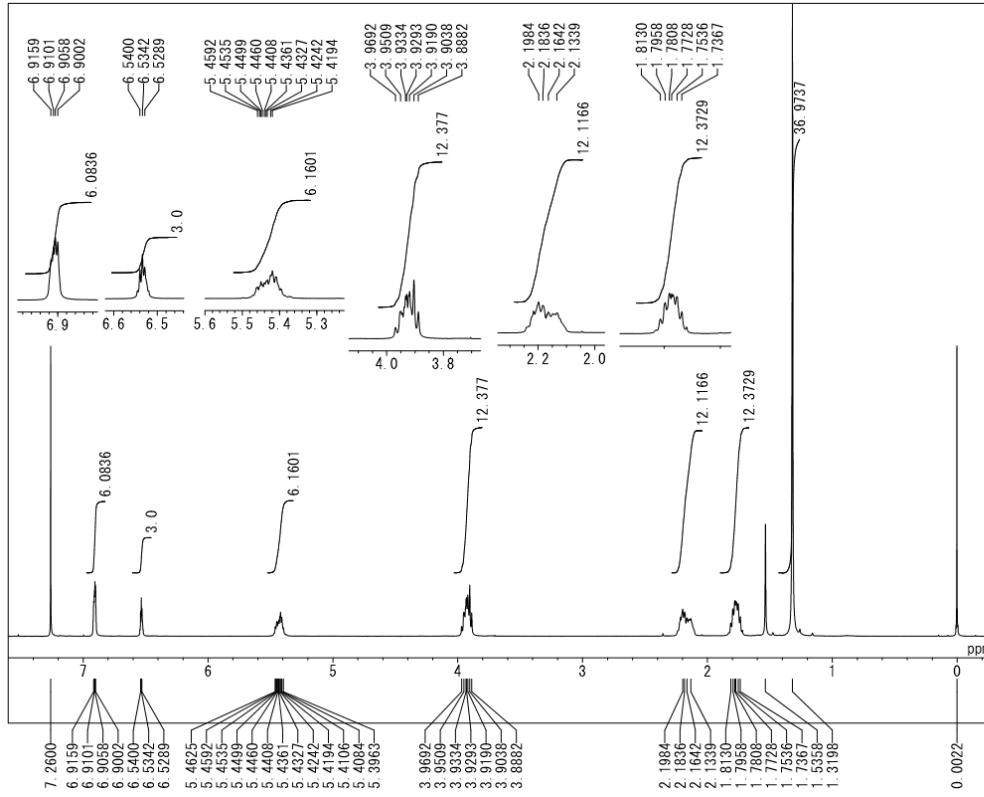

DFILE C:\Users\ator\OneDrive\修論データ\1スベクトル集\C5 BpinMac1C5  
 BpinMac 1H (SO349).RM1  
 DATIM 23/Jan/2020 19:41:53  
 COMNT

OBNUC <sup>1</sup>H  
 EXMOD ZG30  
 OBFRQ 400.13 MHz  
 OBSET 0.0 kHz  
 OBFIN 10003.76 Hz  
 POINT 65536  
 FREQU 8196.722 Hz  
 SCANS 16  
 ACQTM 7.9954 s  
 IRNUC OFF  
 PROBHD Z163739\_0101 (PI RI-400  
 -S1-BBF/H  
 INSTRUM AVANCE  
 PULSPRG ZG30  
 GRDPRG  
 CTEMP 30.0087 °C  
 SLVNT CDCL<sub>3</sub>  
 BF 0.25 Hz  
 RGAIN 101

<sup>1</sup>H NMR

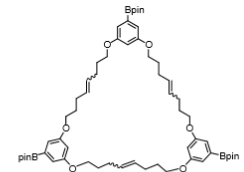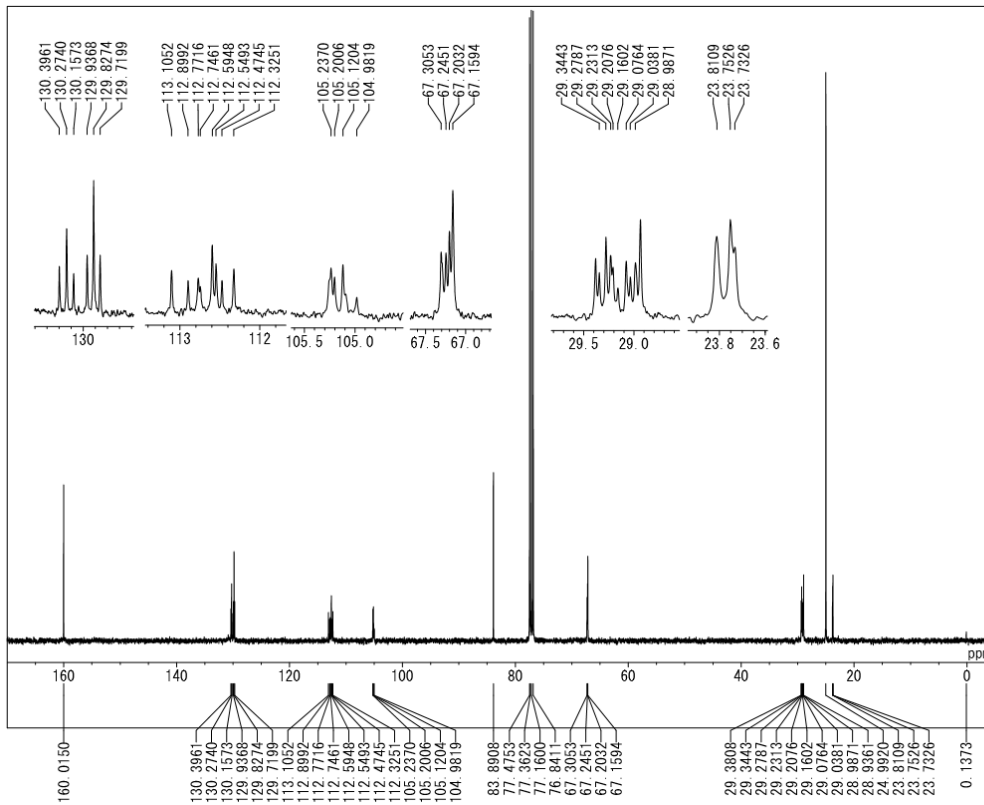

DFILE C:\USERS\ATOR\ONEDRIVE\修論データ\1スベクトル集\C5 BPIN  
 MAC1C5 BPINMAC 13C (SO349).S  
 RM1  
 DATIM 23/Jan/2020 22:58:14  
 COMNT

OBNUC <sup>13</sup>C  
 EXMOD ZGPG30  
 OBFRQ 100.63 MHz  
 OBSET 0.0 kHz  
 OBFIN 9999.211 Hz  
 POINT 32768  
 FREQU 24038.46 Hz  
 SCANS 1024  
 ACQTM 1.3631 s  
 IRNUC OFF  
 PROBHD 5 MM PABBO BB-1H/D Z-  
 GRD Z104450  
 INSTRUM SPECT  
 PULSPRG ZGPG30  
 GRDPRG  
 CTEMP 26.85 °C  
 SLVNT CDCL<sub>3</sub>  
 BF 0.25 Hz  
 RGAIN 114

<sup>13</sup>C NMR

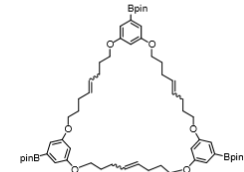

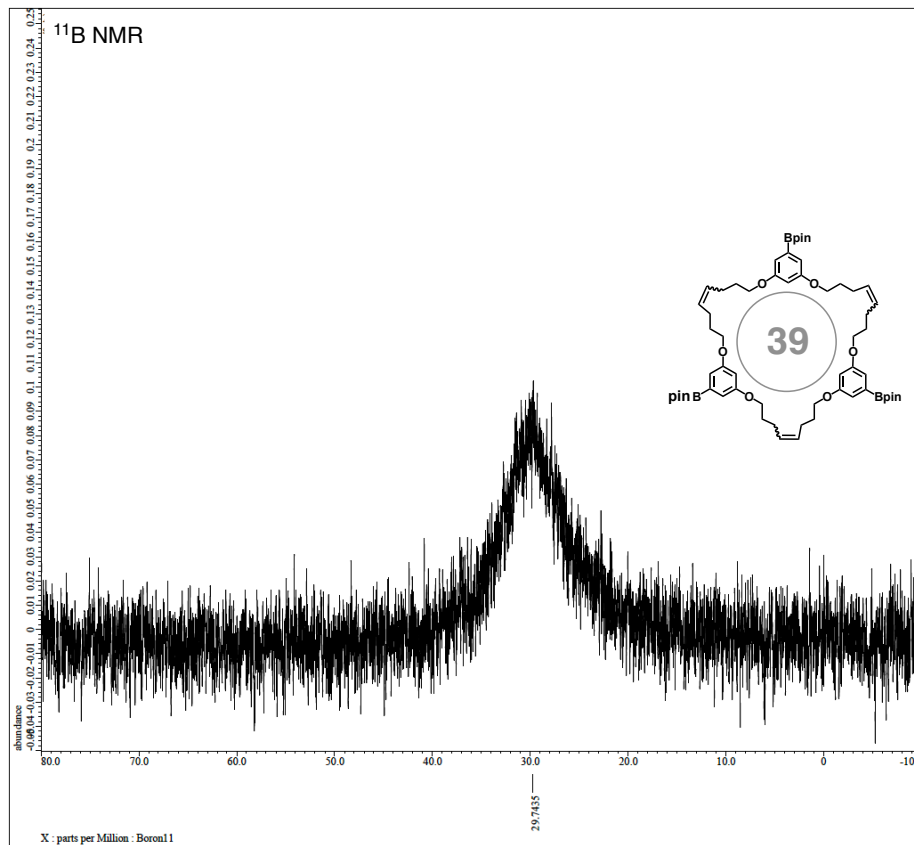



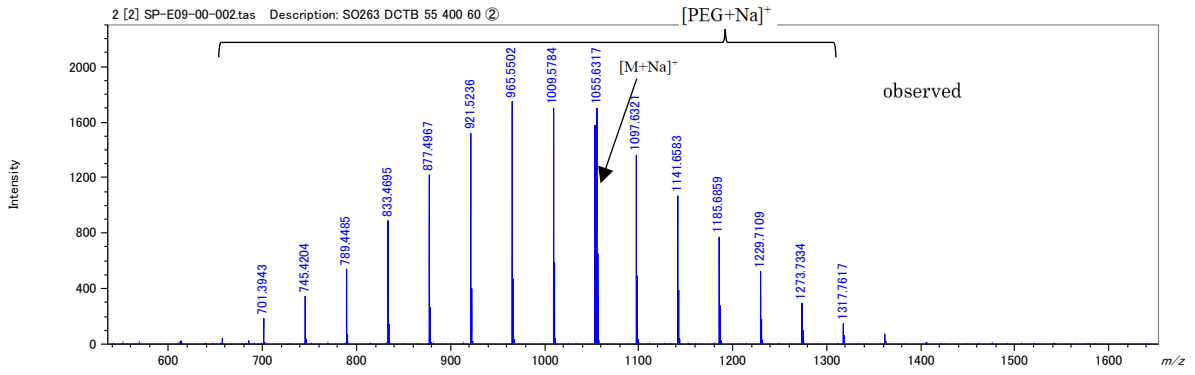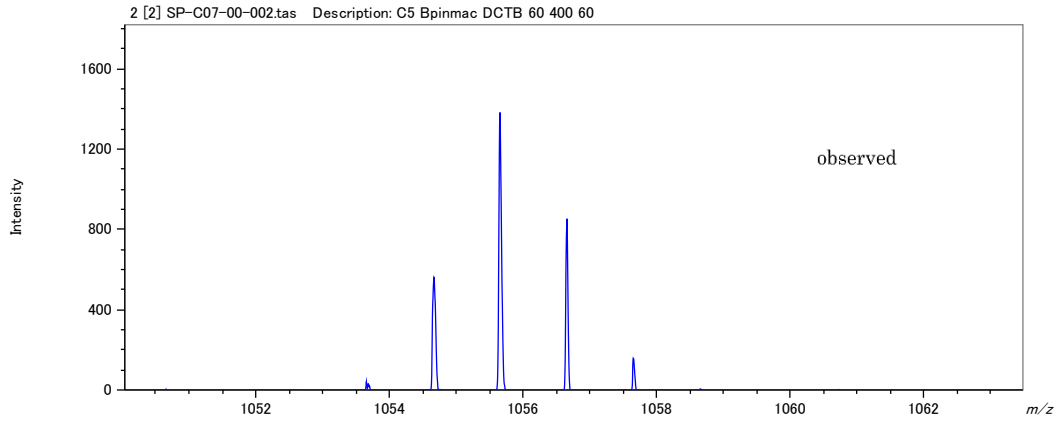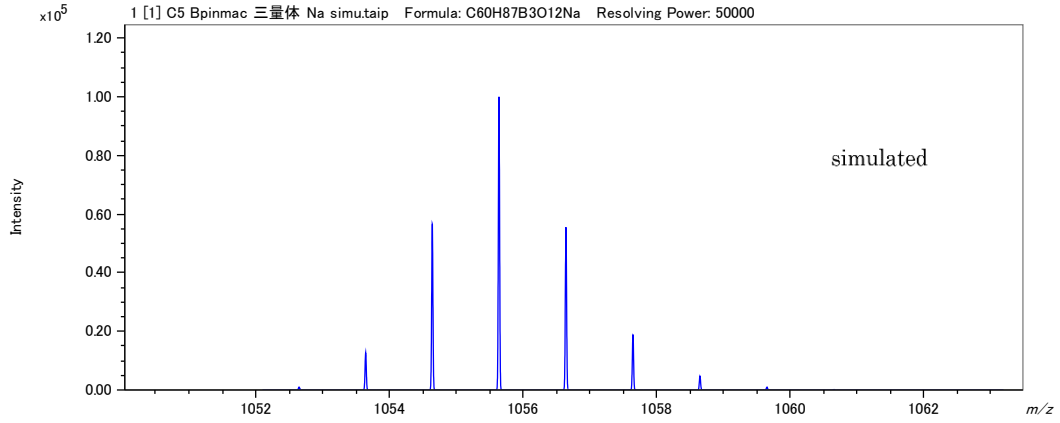

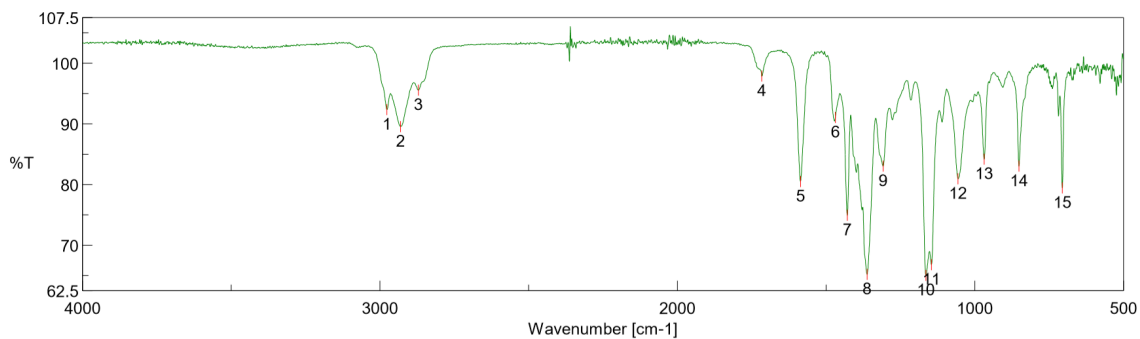

[ピーク検出結果]

| No. | 位置      | 強度      | No. | 位置      | 強度      | No. | 位置      | 強度      |
|-----|---------|---------|-----|---------|---------|-----|---------|---------|
| 1   | 2976.59 | 92.3246 | 2   | 2930.79 | 89.5201 | 3   | 2870.52 | 95.529  |
| 5   | 1586.16 | 80.4899 | 6   | 1469.01 | 91.0395 | 7   | 1428.99 | 74.9222 |
| 9   | 1308.46 | 83.0143 | 10  | 1164.31 | 65.0118 | 11  | 1145.99 | 66.7908 |
| 13  | 968.573 | 84.1554 | 14  | 851.418 | 83.0176 | 15  | 705.819 | 79.4385 |
|     |         |         |     |         |         | 4   | 1716.34 | 97.8455 |
|     |         |         |     |         |         | 8   | 1361.98 | 65.1916 |
|     |         |         |     |         |         | 12  | 1056.32 | 80.9317 |

GPC (JAIGEL, 1HH+2HH)  
 eluent : CHCl<sub>3</sub>  
 flow rate : 5.5 mL/min

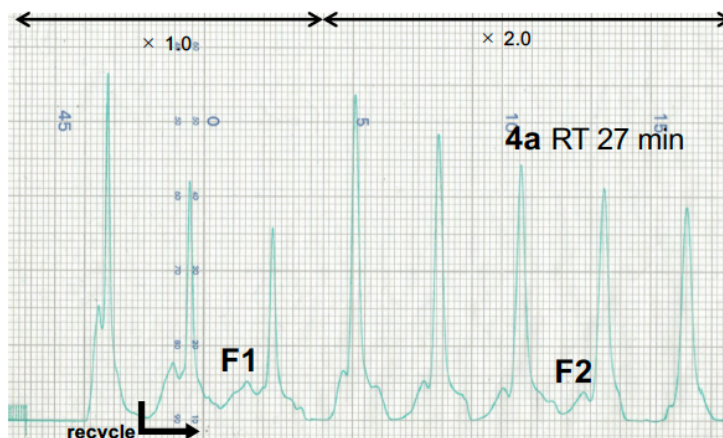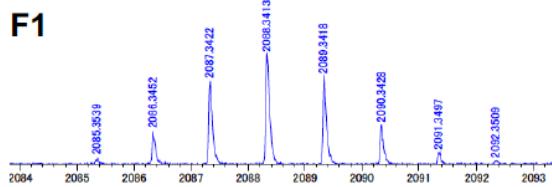

m/z calcd for C<sub>120</sub>H<sub>174</sub>B<sub>6</sub>O<sub>24</sub>  
 [M+Na]<sup>+</sup> : 2088.2918  
 Found : 2088.3413  
**cyclic 6-mer**

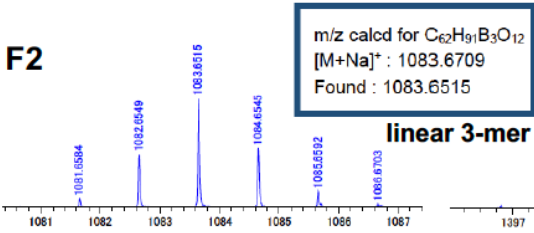

m/z calcd for C<sub>62</sub>H<sub>91</sub>B<sub>3</sub>O<sub>12</sub>  
 [M+Na]<sup>+</sup> : 1083.6709  
 Found : 1083.6515  
**linear 3-mer**

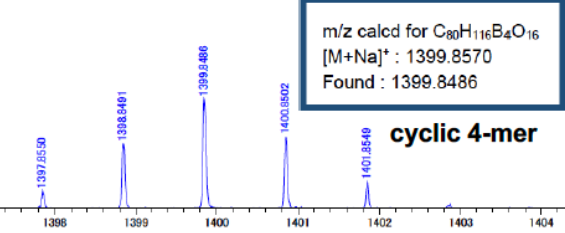

m/z calcd for C<sub>80</sub>H<sub>116</sub>B<sub>4</sub>O<sub>16</sub>  
 [M+Na]<sup>+</sup> : 1399.8570  
 Found : 1399.8486  
**cyclic 4-mer**

Fig. S1 GPC traces of crude **4a** and MALDI-TOF MS analysis of fractions F1 and F2.

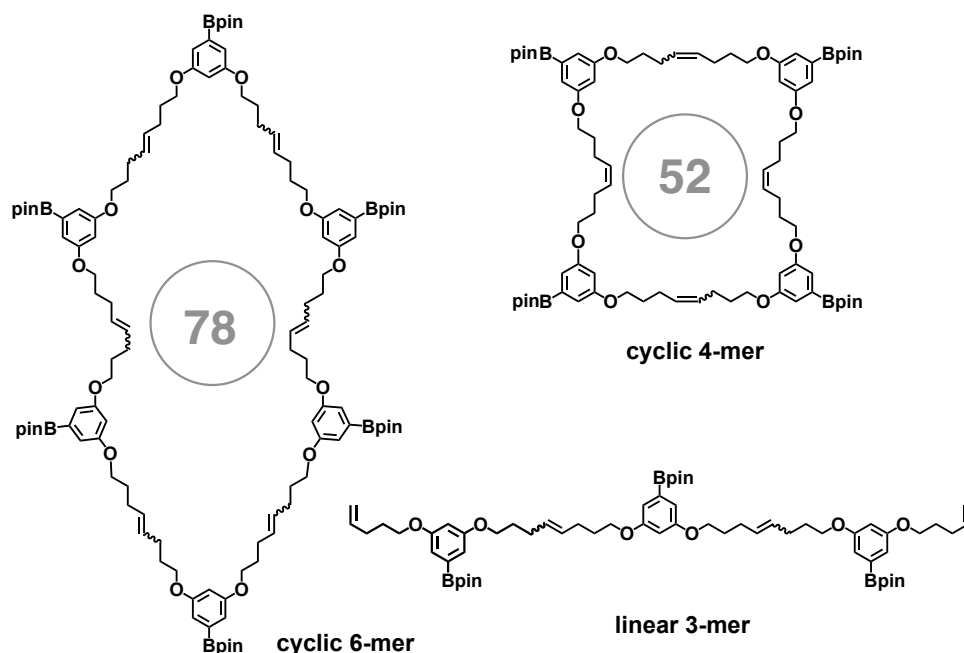

Fig. S2 Chemical structures of cyclic 6-mer, cyclic 4-mer and linear 3-mer.

### 2-3. Boroxine Formation from Boronic acid **1b** to **2b**

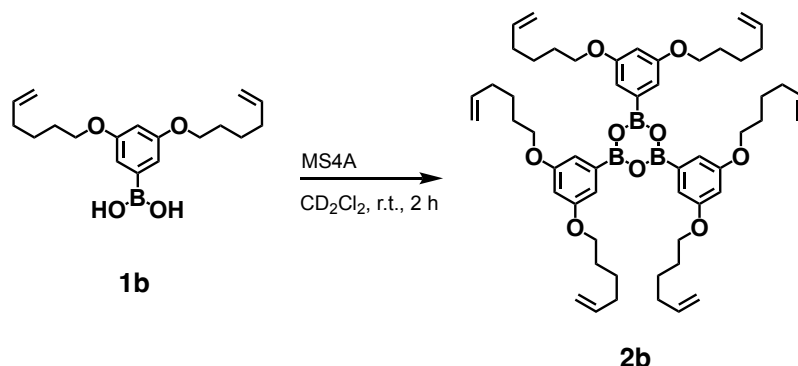

To a  $\text{CDCl}_3$  (600  $\mu\text{L}$ ) solution of boronic acid **1b** (2.1 mg) in an NMR tube was added MS4A. After standing at room temperature for 2 h,  $^1\text{H}$  NMR spectrum of the solution revealed the quantitative formation of boroxine **2b**.

Physical data of **2b**

$^1\text{H}$  NMR (400 MHz,  $\text{CDCl}_3$ ):  $\delta$  7.32 (d,  $J = 2.3$  Hz, 6H), 6.69 (t,  $J = 2.3$  Hz, 3H), 5.85 (ddt,  $J = 17.1, 10.3, 6.7$  Hz, 6H), 5.08-5.03 (m, 6H), 5.00-4.98 (m, 6H), 4.06 (t,  $J = 6.5$  Hz, 12H), 2.19-2.14 (m, 12H), 1.89-1.82 (m, 12H), 1.66-1.58 (m, 12H).

$^{13}\text{C}$  NMR (100 MHz,  $\text{CDCl}_3$ ):  $\delta$  160.2, 138.7, 114.9, 113.7, 105.9, 68.1, 33.6, 28.9, 25.5. The boron-bound carbons were not detected due to quadrupole relaxation.

$^{11}\text{B}$  NMR (160 MHz,  $\text{CDCl}_3$ ):  $\delta$  28.6

HRMS (MALDI<sup>+</sup>): *m/z* calcd. for C<sub>54</sub>H<sub>75</sub>B<sub>3</sub>O<sub>9</sub>Na: 923.5607, found: 923.5546 [M+Na]<sup>+</sup>.

IR (ATR): 3075, 2942, 2912, 2871, 1641, 1585, 1432, 1393, 1332, 1295, 1168, 1043, 993, 909, 849, 728 678 cm<sup>-1</sup>.

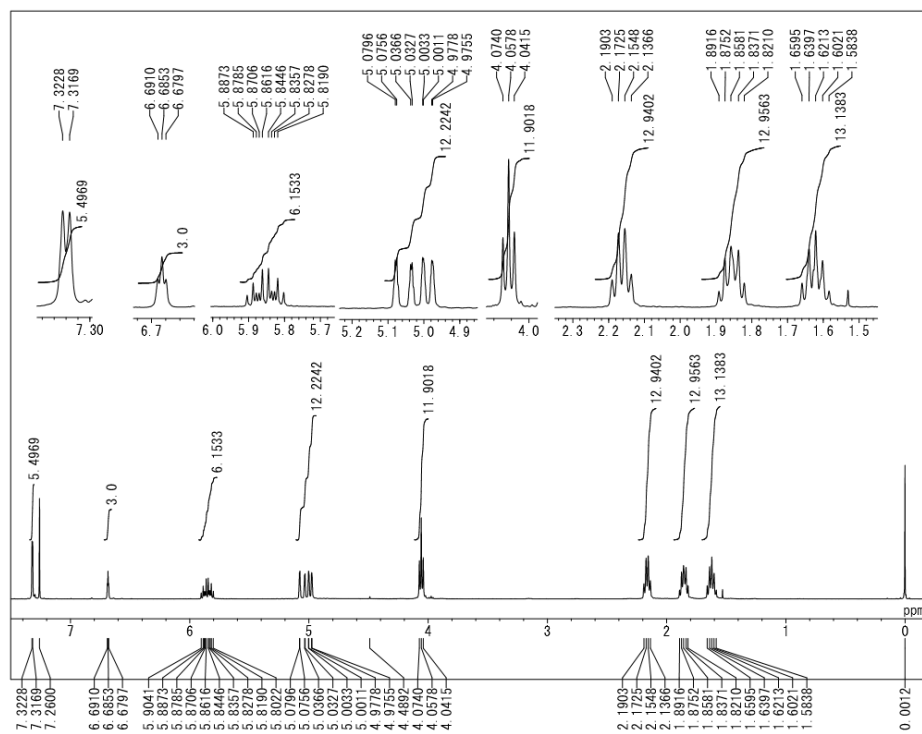

D:\Users\sator\OneDrive\修論データ\ボロキネC6 boroxine 1H (SO287) RM1  
 C6 boroxine 1H (SO287) RM1  
 DATIM 14/Sep/2019 04:26:46  
 COMNT  
 OBNUC <sup>1</sup>H  
 EXMOD proton.jxp  
 OBFREQ 398.78 MHz  
 OBSSET 2.0 kHz  
 OBFIN 199.2106 Hz  
 POINT 131072(ZeroFill=8)  
 FREQU 7476.077 Hz  
 SCANS 8  
 ACQTM 2.1915 s  
 IRNUC <sup>1</sup>H  
 PROBHD JNM-EZ400S/L1  
 INSTRUM  
 PULSPRG  
 GRDPROG  
 CTEMP 24.5 °C  
 SLVNT CHLOROFORM-D  
 BF 0.25 Hz  
 RGAIN 56

<sup>1</sup>H NMR

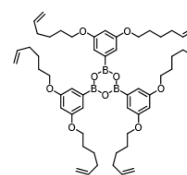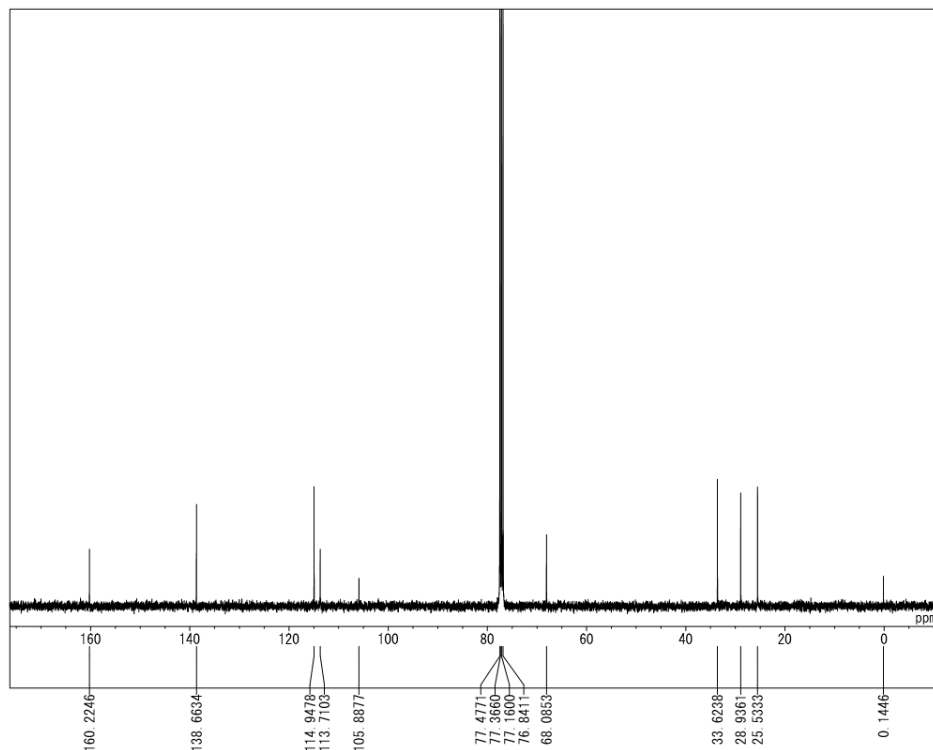

D:\Users\SATOR\IONEDRIVE\修論データ\ボロキネC6 BOROXINE 13C (SO287) SRM1  
 C6 BOROXINE 13C (SO287) SRM1  
 DATIM 19/Sep/2019 00:45:34  
 COMNT  
 OBNUC <sup>13</sup>C  
 EXMOD ZPGPG30  
 OBFREQ 100.63 MHz  
 OBSSET 0.0 kHz  
 OBFIN 9999.213 Hz  
 POINT 32768  
 FREQU 24038.46 Hz  
 SCANS 2048  
 ACQTM 1.3631 s  
 IRNUC OFF  
 PROBHD 5 MM PABBO BB-1HD Z-GRD Z104450  
 INSTRUM SPECT  
 PULSPRG ZPGPG30  
 GRDPROG  
 CTEMP 25.91 °C  
 SLVNT CDCL<sub>3</sub>  
 BF 0.25 Hz  
 RGAIN 72

<sup>13</sup>C NMR

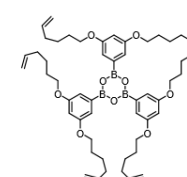

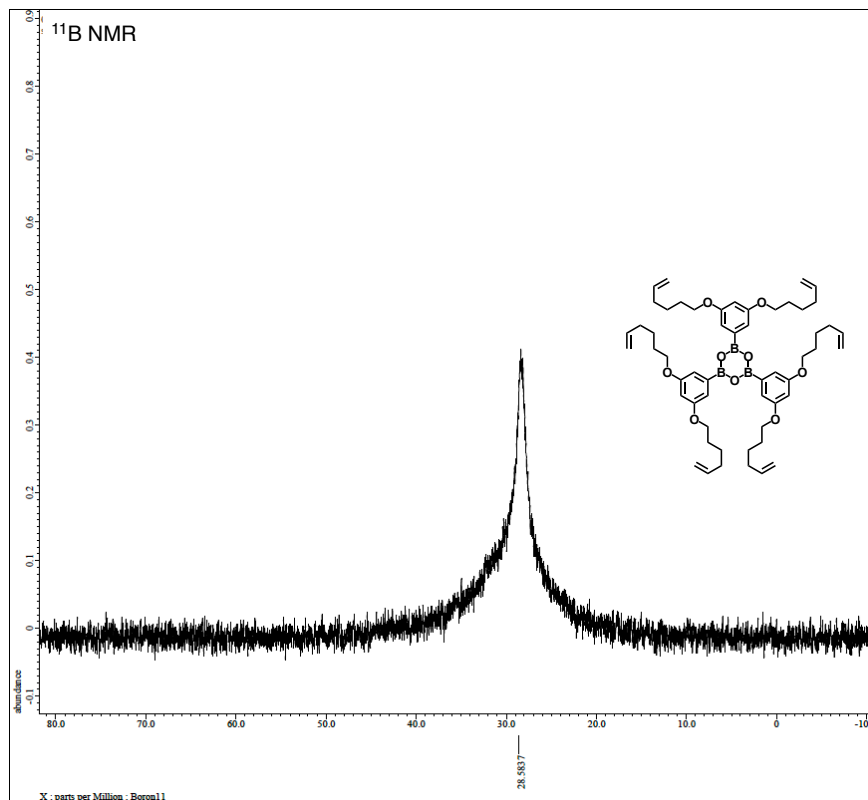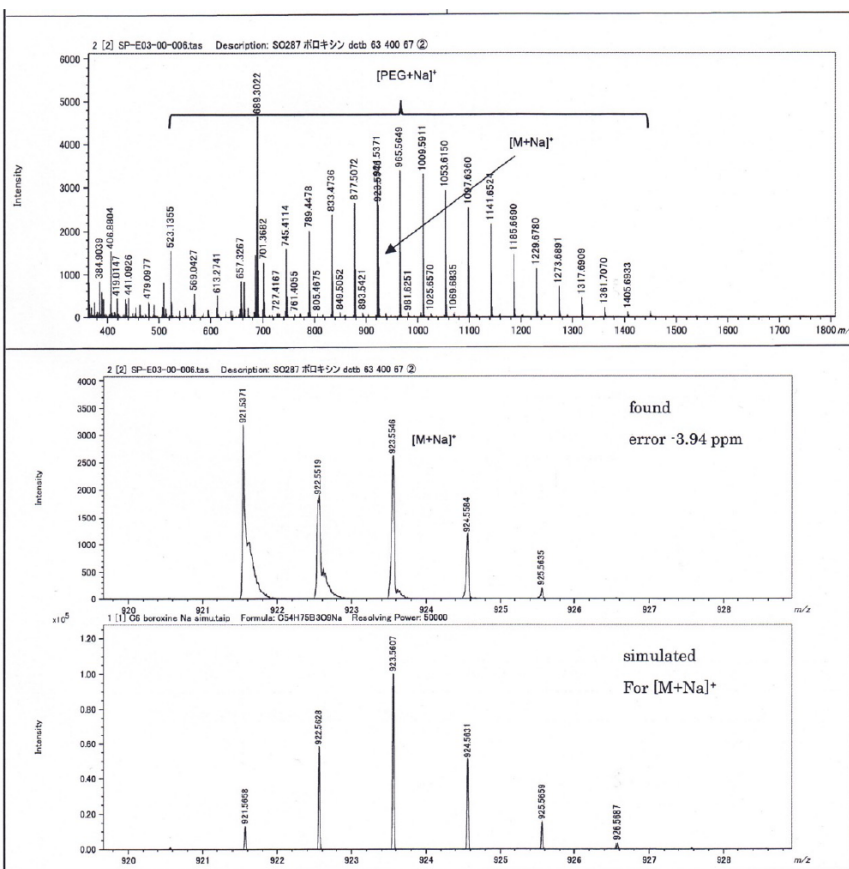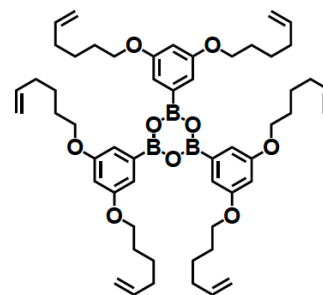

## 2-4. Synthesis of Macrocycle **4b**

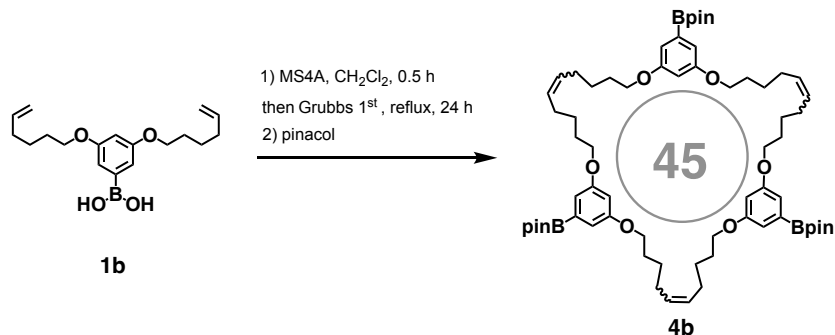

Boronic acid **1b** (79.6 mg, 0.25 mmol) was dissolved in dichloromethane (167 mL) with MS4A and the solution was stirred at room temperature for 0.5 h. Then Grubbs 1<sup>st</sup> Generation catalyst (20.6 mg, 0.025 mmol) was added and the resulting mixture was refluxed for 24 h under Ar. The reaction was quenched with ethyl vinyl ether (200  $\mu$ L) and the solvent was evaporated to crude **3b**. The crude was treated with pinacol (29.5 mg, 0.25 mmol) in a mixture of methanol and chloroform and MS4A was removed by filtration. The filtrate was evaporated and the resulting crude product was purified by GPC to afford the desired **4b** (73.5 mg, 79%).

Physical data of **4b** (*cis/trans* isomers)

<sup>1</sup>H NMR (400 MHz, CDCl<sub>3</sub>):  $\delta$  6.92 (d,  $J$  = 2.3 Hz, 6H), 6.55 (t,  $J$  = 2.3 Hz, 3H), 5.43-5.37 (m, 6H), 3.96 (t,  $J$  = 6.3 Hz, 12H), 2.11-2.02 (m, 12H), 1.79-1.71 (m, 12H), 1.54-1.47 (m, 12H), 1.32 (s, 36H).

<sup>13</sup>C NMR (100 MHz, CDCl<sub>3</sub>):  $\delta$  160.1, 130.5, 130.0, 112.6, 105.3, 83.9, 68.0, 32.3, 29.0, 28.9, 27.0, 26.3, 26.1, 25.0. The boron-bound carbons were not detected due to quadrupole relaxation.

<sup>11</sup>B NMR (160 MHz, CDCl<sub>3</sub>):  $\delta$  29.7

HRMS (MALDI<sup>+</sup>):  $m/z$  calcd. for C<sub>66</sub>H<sub>99</sub>B<sub>3</sub>O<sub>12</sub>Na: 1139.7337, found: 1139.7288 [M+Na]<sup>+</sup>.

IR (ATR): 2976, 2931, 2867, 1716, 1585, 1428, 1359, 1308, 1145, 1060, 968, 851, 706 cm<sup>-1</sup>.

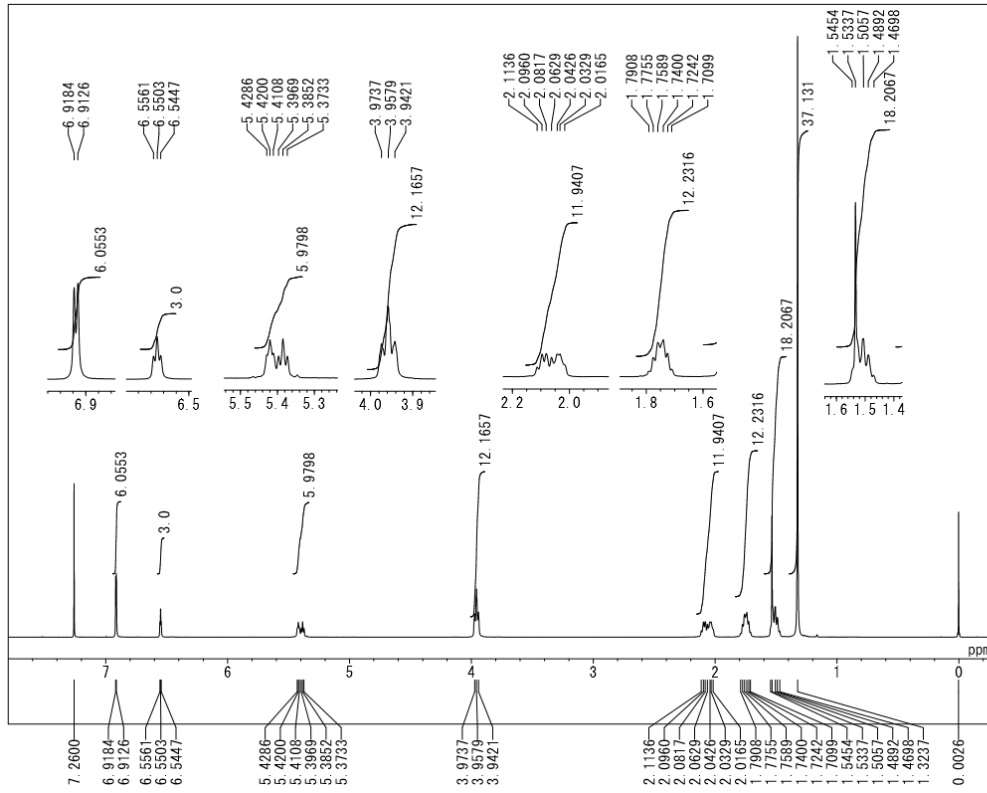

DFILE C:\Users\ator\OneDrive\修論データ\spectol\6BpinMac\1C6 BpinMac 1H (SO357).RM1  
 DATIM 19/Feb/2020 10:48:56  
 COMNT

OBNUC <sup>1</sup>H  
 EXMOD ZG30  
 OBFREQ 400.13 MHz  
 OBSET 0.0 kHz  
 OBFIN 10003.76 Hz  
 POINT 65536  
 FREQU 8196.722 Hz  
 SCANS 16  
 ACQTM 7.9954 s  
 IRNUC OFF  
 PROBHD Z163739\_0101 (PI HR-400 S1-BBFH)  
 INSTRUM AVANCE  
 PULSPRG ZG30  
 GRDPROG  
 CTEMP 30.0101 °C  
 SLVNT CDCL<sub>3</sub>  
 BF 0.25 Hz  
 RGAIN 101

<sup>1</sup>H NMR

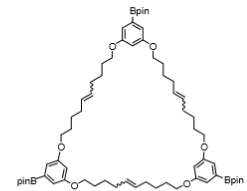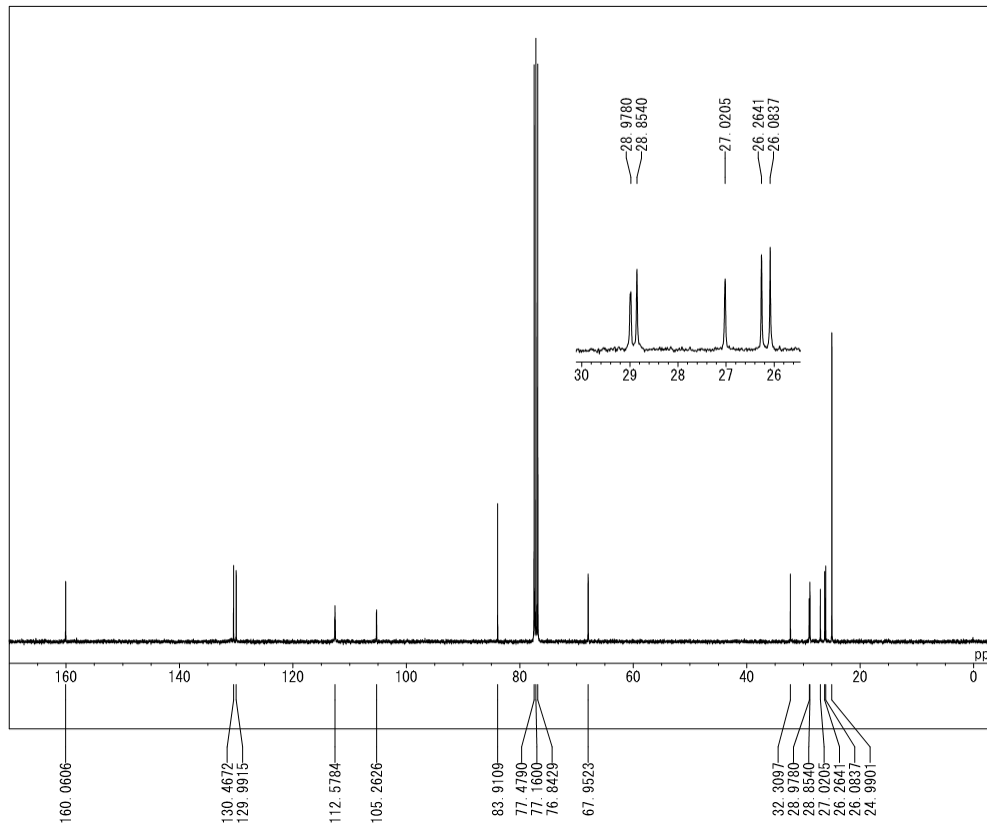

DFILE C:\USERS\ISATOR\ONEDRIVE\修論データ\spectol\6BpinMAC\13C (SO322).S  
 RM1  
 DATIM 08/Nov/2019 23:59:26  
 COMNT

OBNUC <sup>13</sup>C  
 EXMOD ZGPG30  
 OBFREQ 100.63 MHz  
 OBSET 0.0 kHz  
 OBFIN 9999.214 Hz  
 POINT 32768  
 FREQU 24038.46 Hz  
 SCANS 2048  
 ACQTM 1.3631 s  
 IRNUC OFF  
 PROBHD 5 MM PABBO BB-1H/D Z-GRD Z104450  
 INSTRUM SPECT  
 PULSPRG ZGPG30  
 GRDPROG  
 CTEMP 400.01 °C  
 SLVNT CDCL<sub>3</sub>  
 BF 0.25 Hz  
 RGAIN 57

<sup>13</sup>C NMR

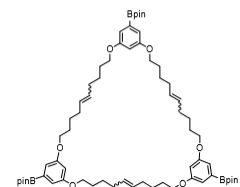

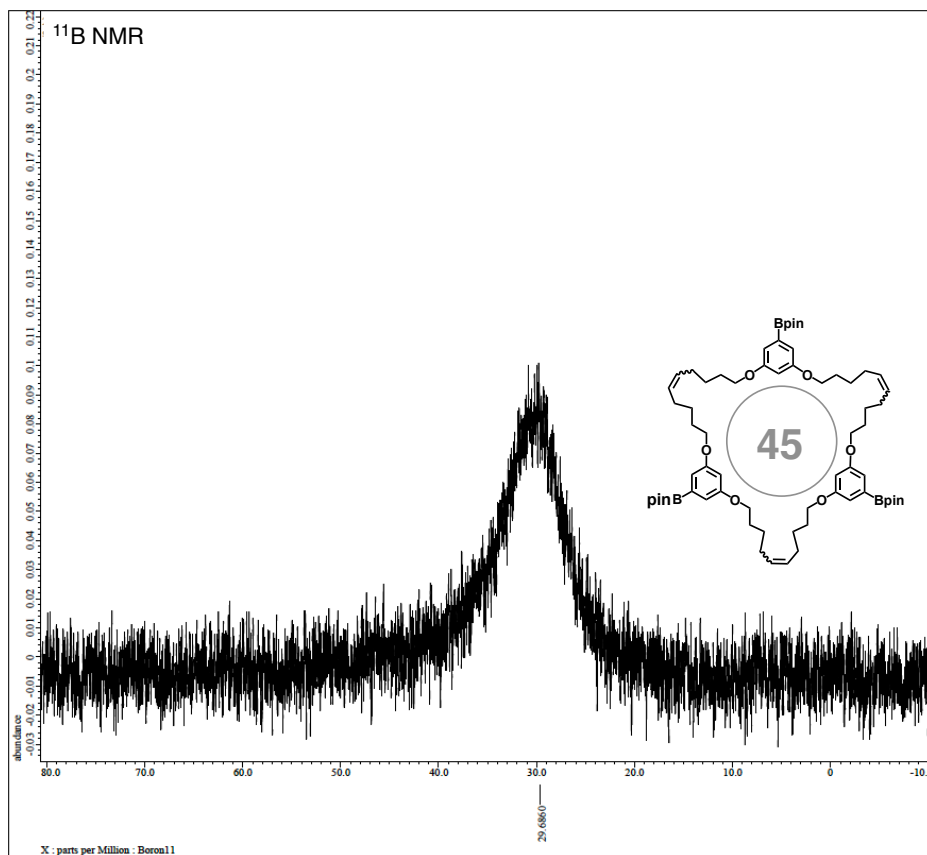



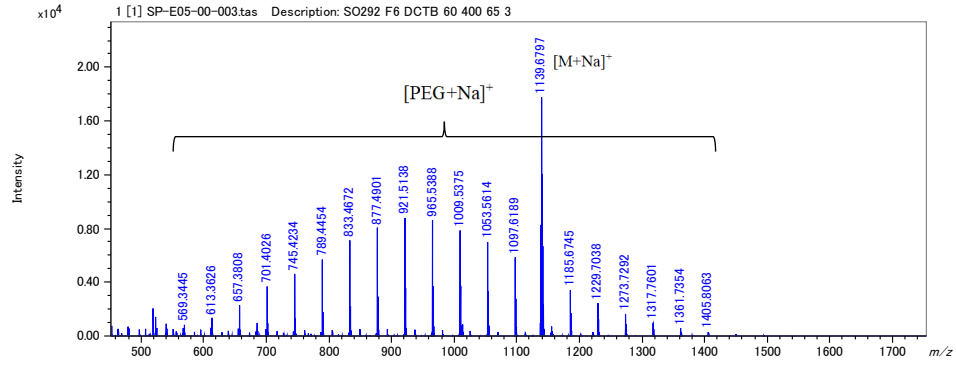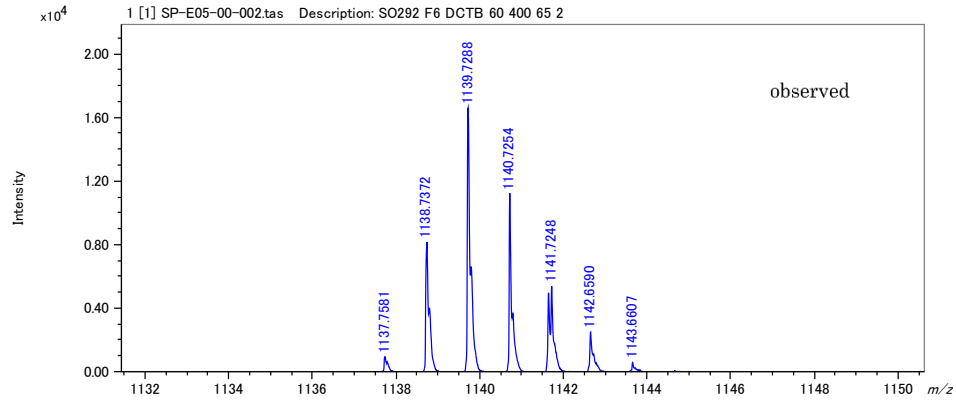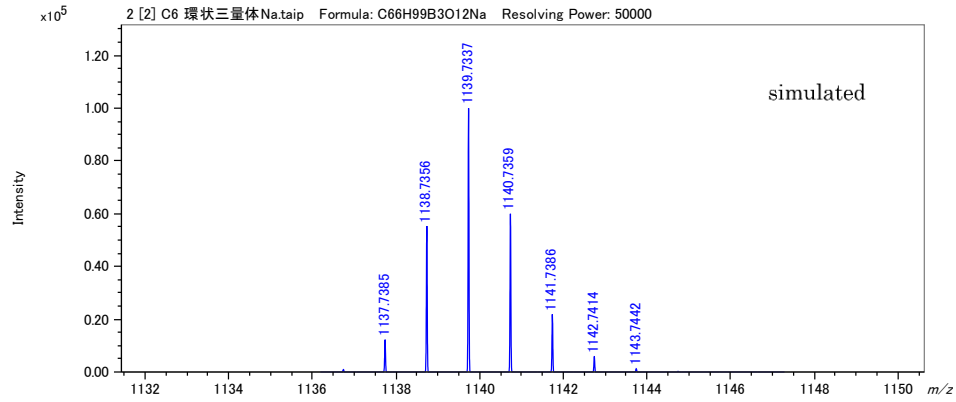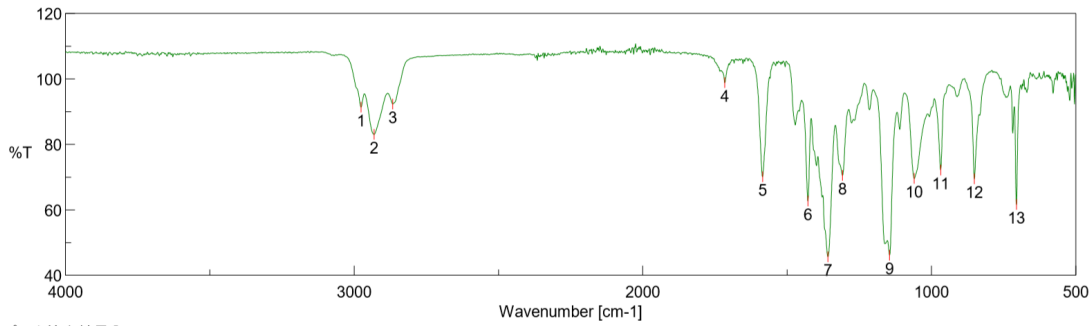

[ピーク検出結果]

| No. | 位置      | 強度      | No. | 位置      | 強度      | No. | 位置      | 強度      |
|-----|---------|---------|-----|---------|---------|-----|---------|---------|
| 1   | 2976.11 | 91.3758 | 3   | 2866.67 | 92.3136 | 4   | 1716.34 | 98.8583 |
| 5   | 1585.2  | 70.1169 | 6   | 1428.03 | 62.668  | 7   | 1358.6  | 45.6389 |
| 9   | 1145.03 | 46.1134 | 10  | 1059.69 | 69.5568 | 11  | 968.09  | 72.1463 |
| 13  | 705.819 | 61.6279 |     |         |         | 12  | 851.418 | 69.4343 |

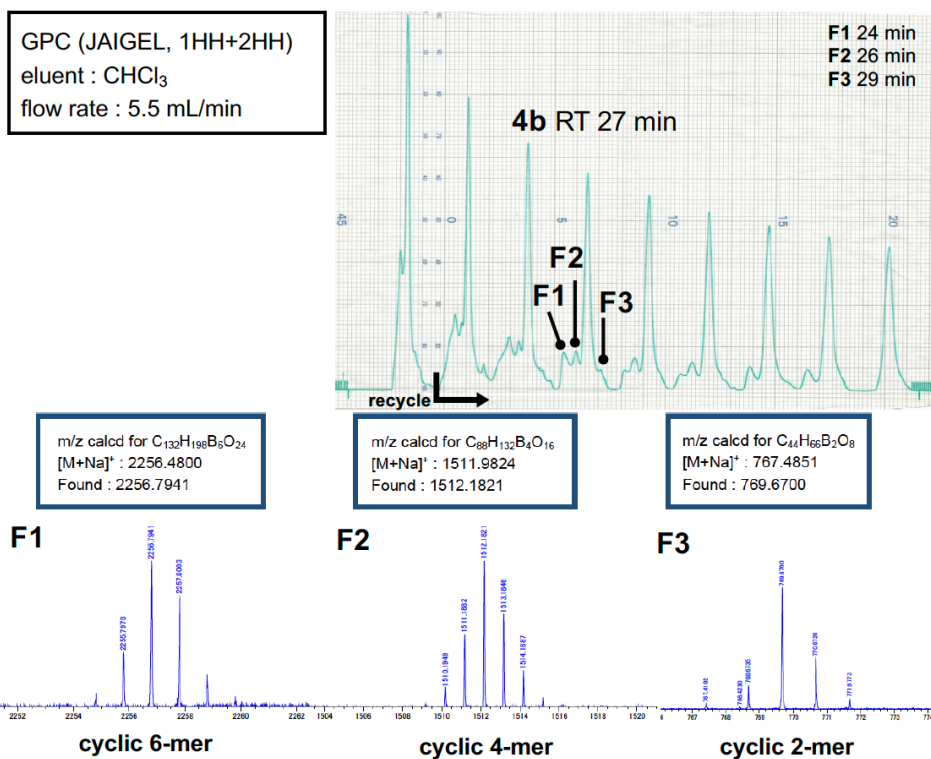

Fig. S3 GPC traces of crude **4b** and MALDI-TOF MS analysis of fractions F1, F2 and F3.

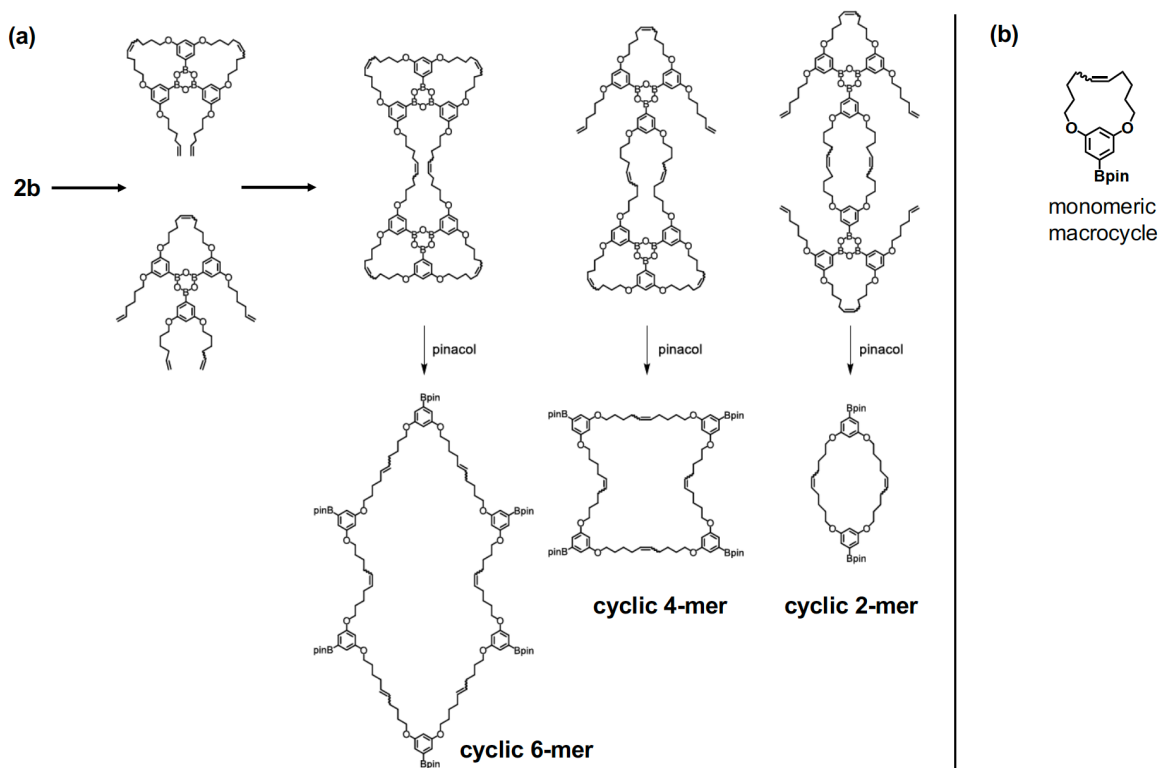

Fig. S4 (a) Chemical structures of cyclic 6-mer, cyclic 4-mer and cyclic 2-mer and their plausible formation mechanism from **2b**. (b) Chemical structure of monomeric macrocycle formed by self-cyclization of **1b**.

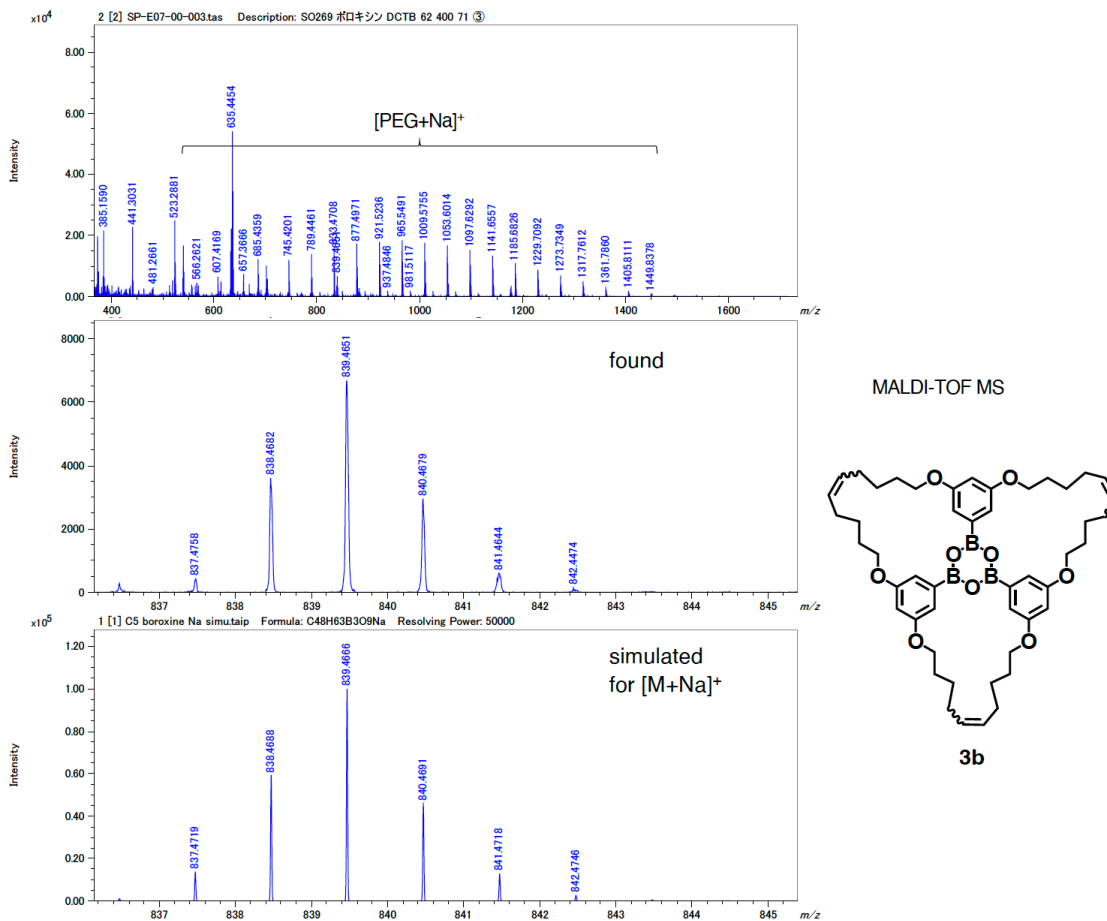

Fig. S5 MALDI-TOF MS spectra of crude **3b**

## 2-5. Boroxine Formation from Boronic acid **1c** to **2c**

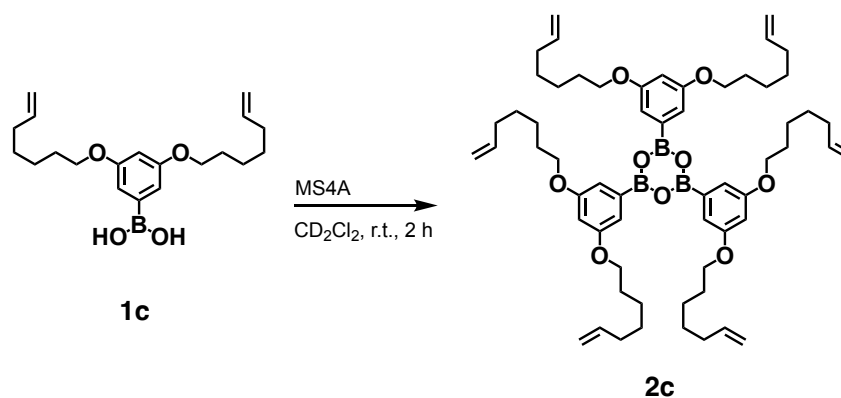

To a  $CDCl_3$  (600  $\mu L$ ) solution of boronic acid **1c** (2.4 mg) in an NMR tube was added MS4A. After standing at room temperature for 2 h,  $^1H$  NMR spectrum of the solution revealed the quantitative formation of boroxine **2c**.

Physical data of **2c**

$^1\text{H}$  NMR (400 MHz,  $\text{CDCl}_3$ ):  $\delta$  7.32 (d,  $J = 2.3$  Hz, 6H), 6.68 (t,  $J = 2.3$  Hz, 3H), 5.83 (ddt,  $J = 17.1, 10.3, 6.7$  Hz, 6H), 5.05-5.00 (m, 6H), 4.98-4.94 (m, 6H), 4.05 (t,  $J = 6.5$  Hz, 12H), 2.13-2.09 (m, 12H), 1.85 (quin,  $J = 6.8$  Hz, 12H), 1.53-1.51 (m, 24H).

$^{13}\text{C}$  NMR (100 MHz,  $\text{CDCl}_3$ ):  $\delta$  160.2, 139.0, 114.6, 113.7, 105.8, 68.2, 33.8, 29.4, 28.9, 25.8. The boron-bound carbons were not detected due to quadrupole relaxation.

$^{11}\text{B}$  NMR (160 MHz,  $\text{CDCl}_3$ ):  $\delta$  29.4

HRMS (MALDI<sup>+</sup>):  $m/z$  calcd. for  $\text{C}_{60}\text{H}_{87}\text{B}_3\text{O}_9\text{Na}$ : 1007.6548, found: 1007.6484  $[\text{M}+\text{Na}]^+$ .

IR (ATR): 3074, 2927, 2856, 1640, 1586, 1462, 1431, 1338, 1259, 1162, 1053, 993, 908, 844, 729,  $\text{cm}^{-1}$ .

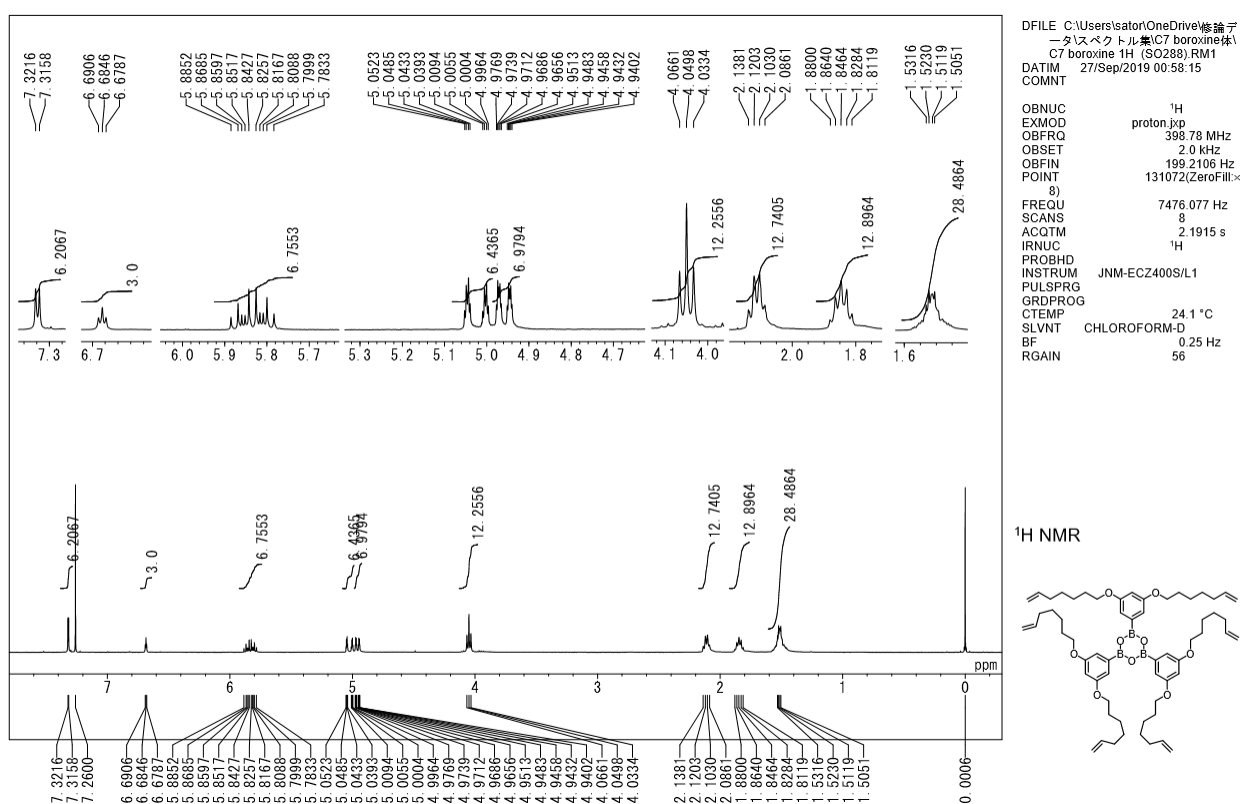

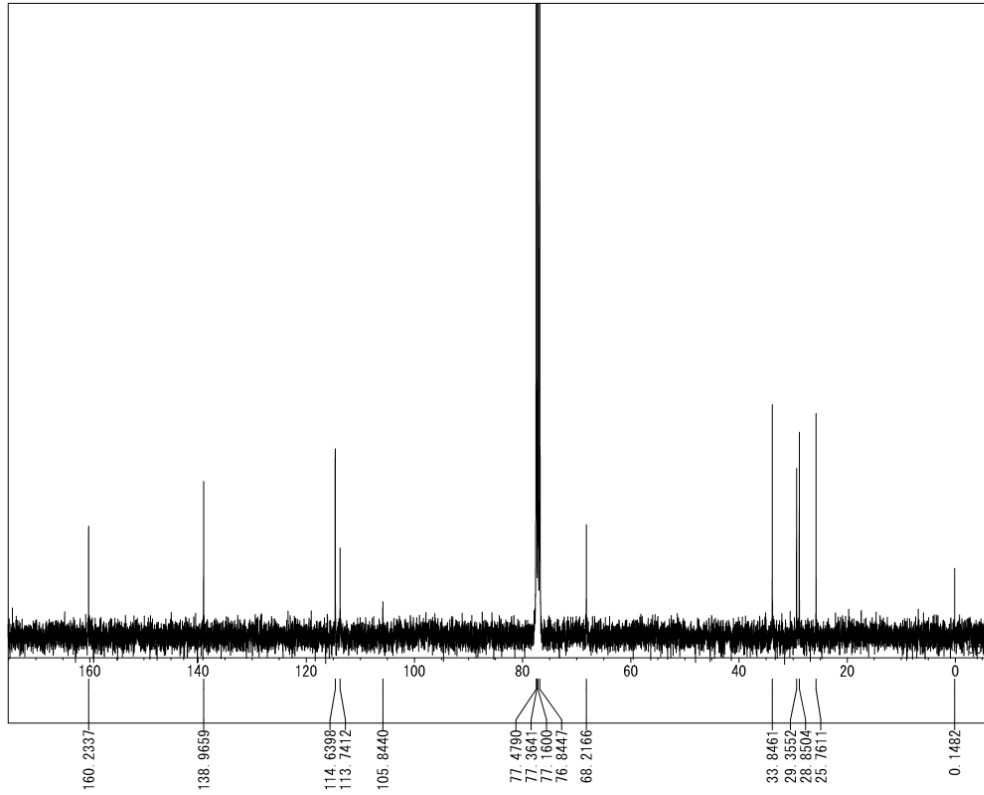

DFILE C:\USERS\ISATOR\IONEDRIVE\  
 修論データスペクトル集\1C7 BOR  
 OXINE\1C7 BOROXINE 13C (SO  
 288).SRM1  
 DATIM 27/Sep/2019 02:09:39  
 COMNT  
 OBNUC <sup>13</sup>C  
 EXMOD ZPGPG30  
 OBFREQ 100.63 MHz  
 OBSET 0.0 kHz  
 OBFIN 9999.214 Hz  
 POINT 32768  
 FREQU 24038.46 Hz  
 SCANS 2048  
 ACQTM 1.3631 s  
 IRNUC OFF  
 PROSHD 5 MM PABBO BB-1H/D Z-  
 GRD Z104450  
 INSTRUM SPECT  
 PULSPRG ZPGPG30  
 GRDPRG  
 CTEMP 25.61 °C  
 SLVNT CDCL<sub>3</sub>  
 BF 0.25 Hz  
 RGAIN 81

<sup>13</sup>C NMR

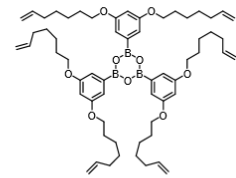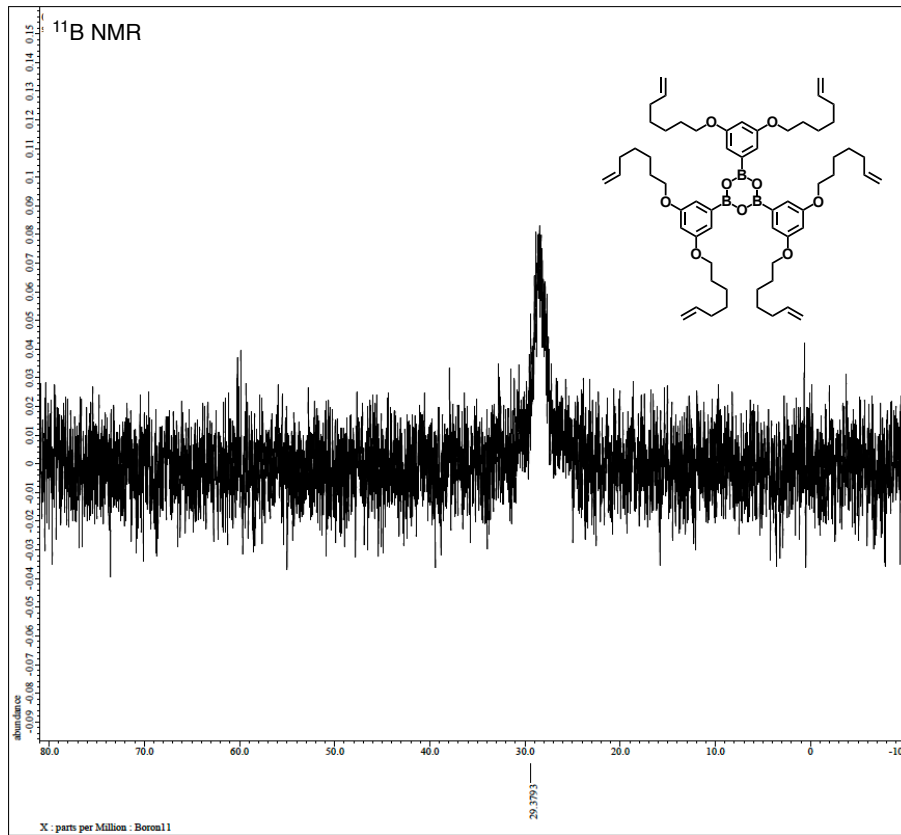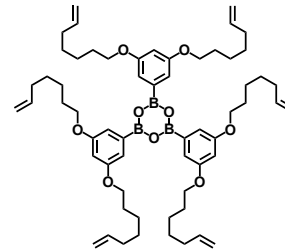

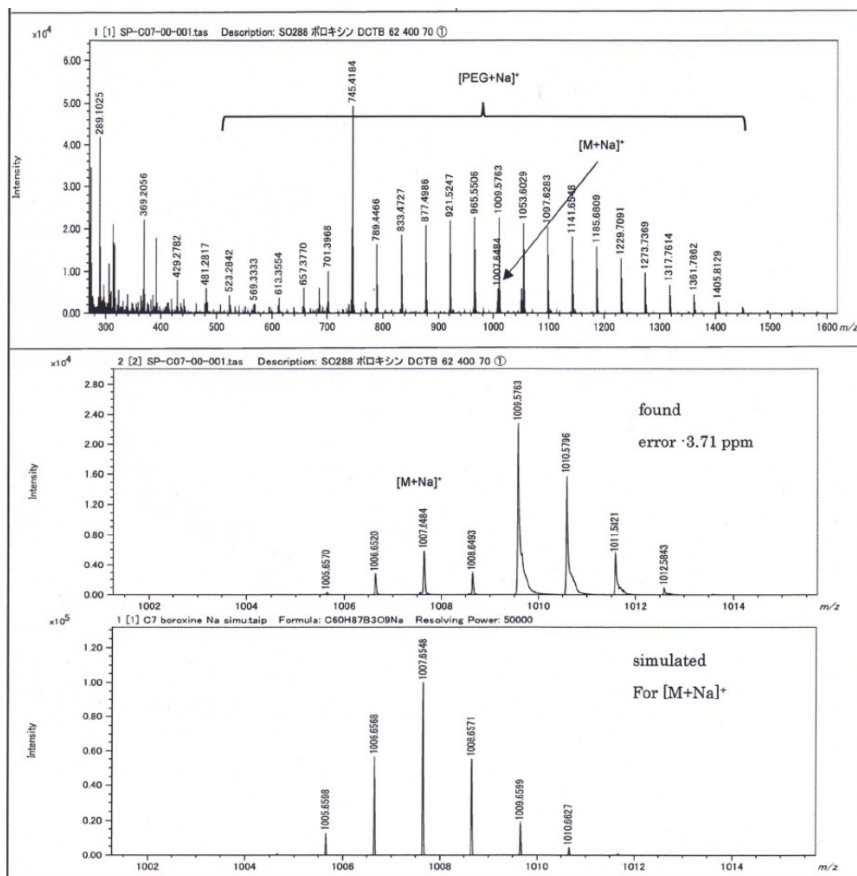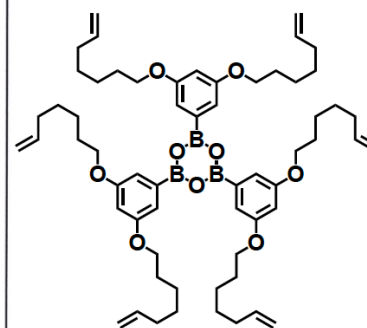

## 2-6. Synthesis of Macrocycle 4c

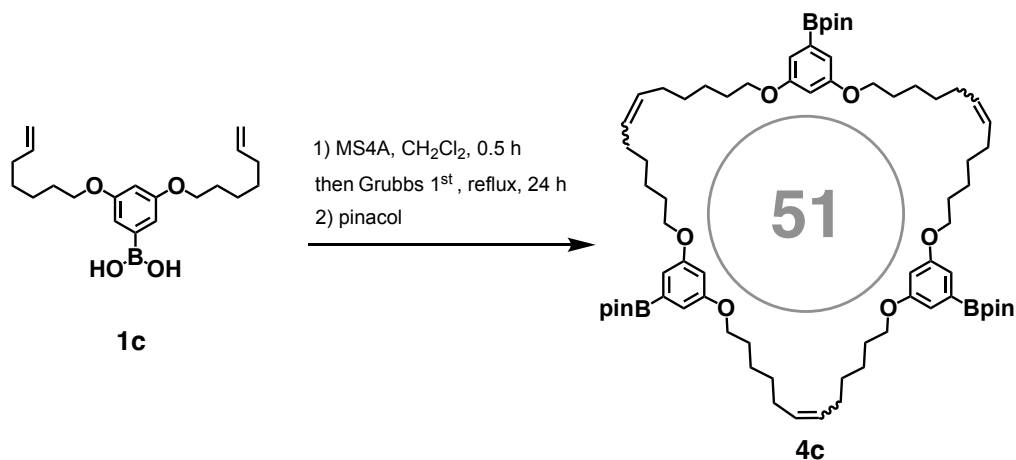

Boronic acid **1c** (92.9 mg, 0.268 mmol) was dissolved in dichloromethane (340 mL) with MS4A and stirred at room temperature for 2 h. Then Grubbs 1<sup>st</sup> Generation catalyst (22.1 mg, 27.0  $\mu$ mol) was added and the resulting mixture was refluxed for 40 h. Ethyl vinyl ether (400  $\mu$ L) was added and the mixture was stirred at room temperature for 2 h. After MS4A was removed and solvent was evaporated to crude **3c**, the crude

was treated with 3.0 equivalent pinacol (31.7 mg, 270  $\mu\text{mol}$ ) in a mixture of methanol and chloroform. After solvent was evaporated, the residue was purified by GPC to afford the desired **4c** (39.2 mg, 38%).

Physical data of **4c** (mixture of *cis/trans* isomers)

$^1\text{H}$  NMR (400 MHz,  $\text{CDCl}_3$ ):  $\delta$  6.91 (d,  $J = 2.3$  Hz, 6H), 6.54 (t,  $J = 2.3$  Hz, 3H), 5.40-5.35 (m, 6H), 3.95 (t,  $J = 6.4$  Hz, 12H), 2.07-1.99 (m, 12H), 1.74 (quin,  $J = 6.7$  Hz, 12H), 1.47-1.38 (m, 24H), 1.32 (s, 36 H).

$^{13}\text{C}$  NMR (100 MHz,  $\text{CDCl}_3$ ):  $\delta$  160.1, 130.5, 130.0, 112.5, 105.3, 83.9, 68.0, 32.6, 29.6, 29.3, 29.3, 27.3, 25.9, 25.6, 25.0. The boron-bound carbons were not detected due to quadrupole relaxation.

$^{11}\text{B}$  NMR (160 MHz,  $\text{CDCl}_3$ ):  $\delta$  30.1

HRMS (MALDI $^+$ ):  $m/z$  calcd. for  $\text{C}_{72}\text{H}_{111}\text{B}_3\text{O}_{12}\text{Na}$ : 1223.8278, found: 1223.8221  $[\text{M}+\text{Na}]^+$ .

IR (ATR): 2977, 2929, 2855, 1715, 1585, 1428, 1357, 1308, 1144, 1052, 967, 851, 705  $\text{cm}^{-1}$ .

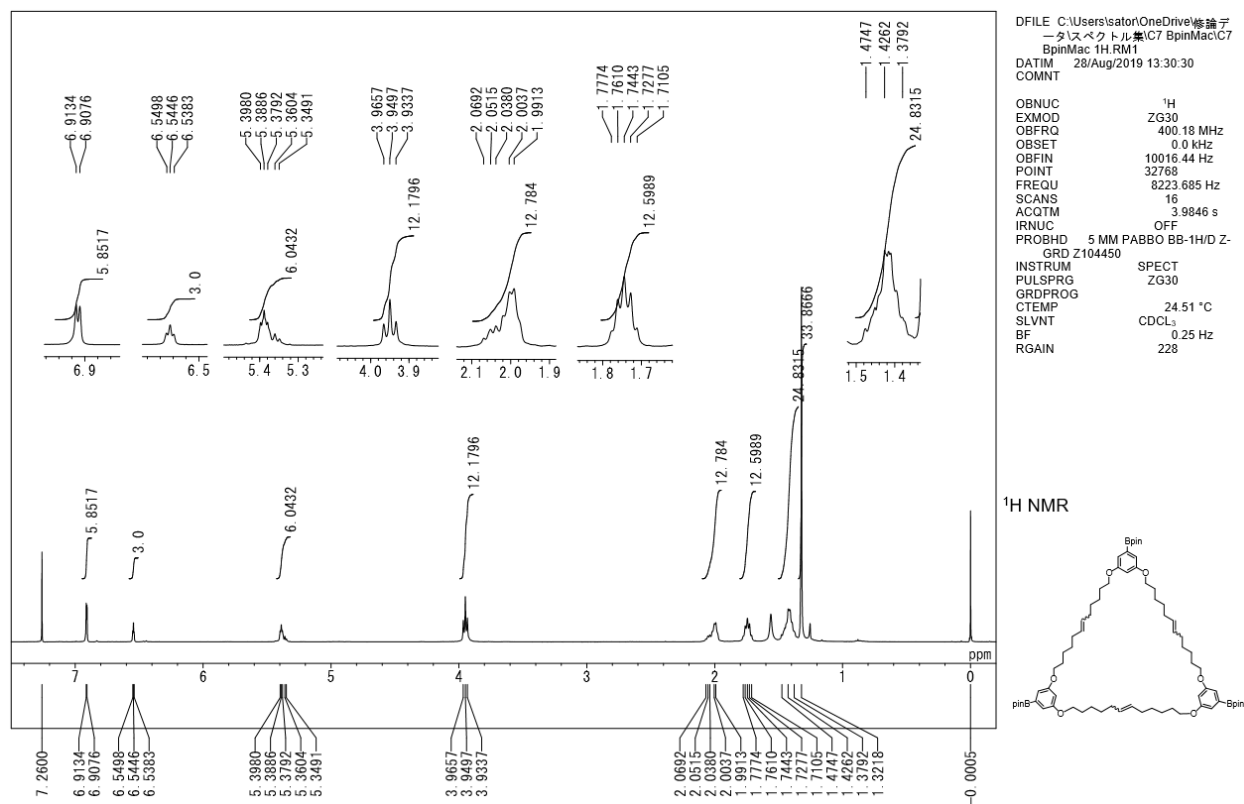

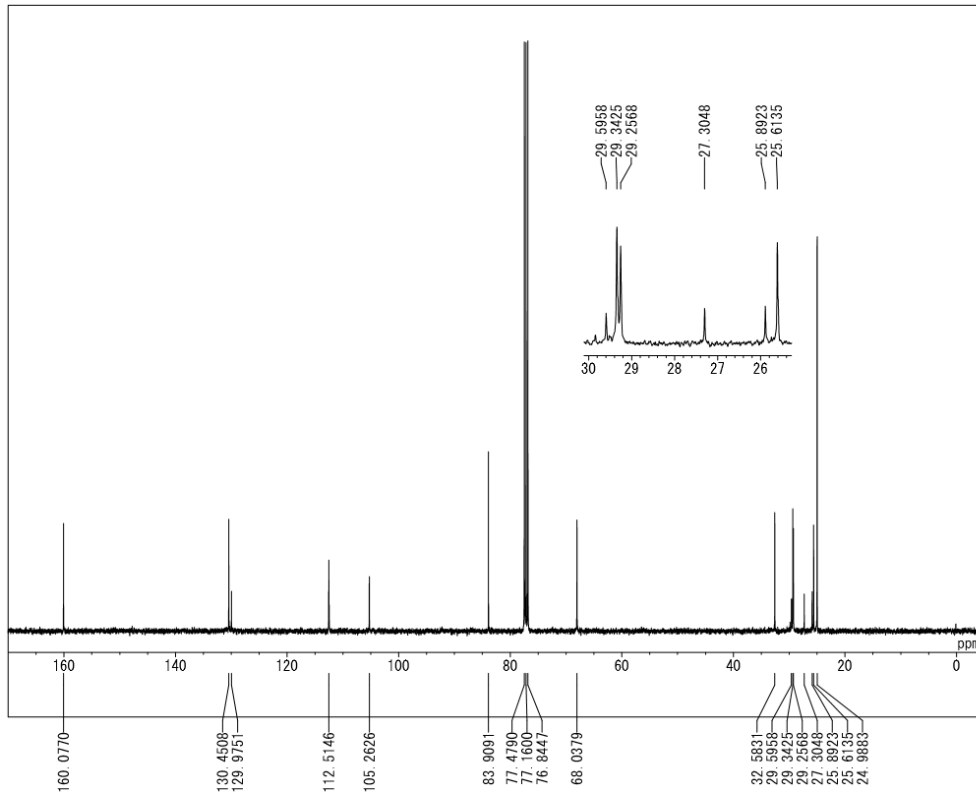

D:\FILE C:\USERS\ISATOR\IONEDRIVE\  
 修論データスペクトル集\CT BPIN  
 MAC\7 BPINMAC 13C (SO283).R  
 M1  
 DATIM 21/Sep/2019 08:48:01  
 COMNT  
 OBNUC <sup>13</sup>C  
 EXMOD ZGPG30  
 OBFRQ 100.63 MHz  
 OBSET 0.0 kHz  
 OBFIN 9999.208 Hz  
 POINT 32768  
 FREQU 24038.46 Hz  
 SCANS 1024  
 ACQTM 1.3631 s  
 IRNUC OFF  
 PROBHD 5 MM PABBO BB-1H/D Z-  
 GRD Z104450  
 INSTRUM SPECT  
 PULSPRG ZGPG30  
 GRDPRG  
 CTEMP 26.01 °C  
 SLVNT CDCL<sub>3</sub>  
 BF 0.25 Hz  
 RGAIN 64

<sup>13</sup>C NMR

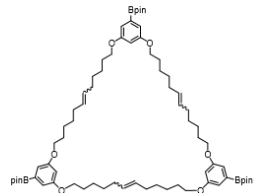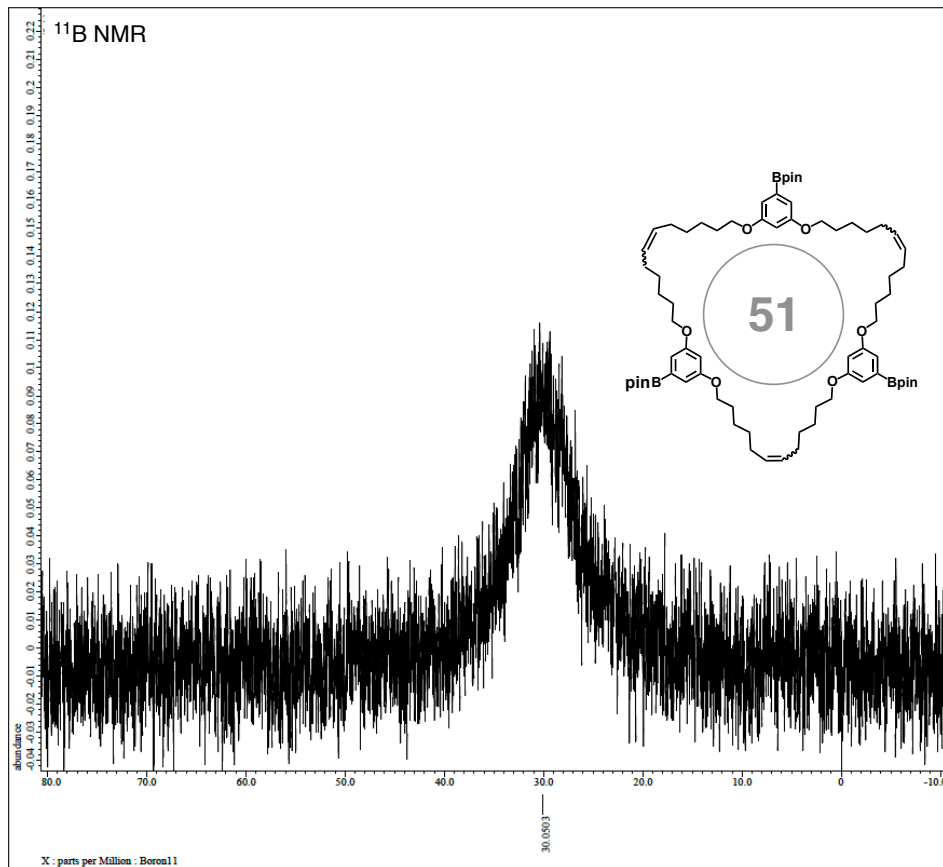



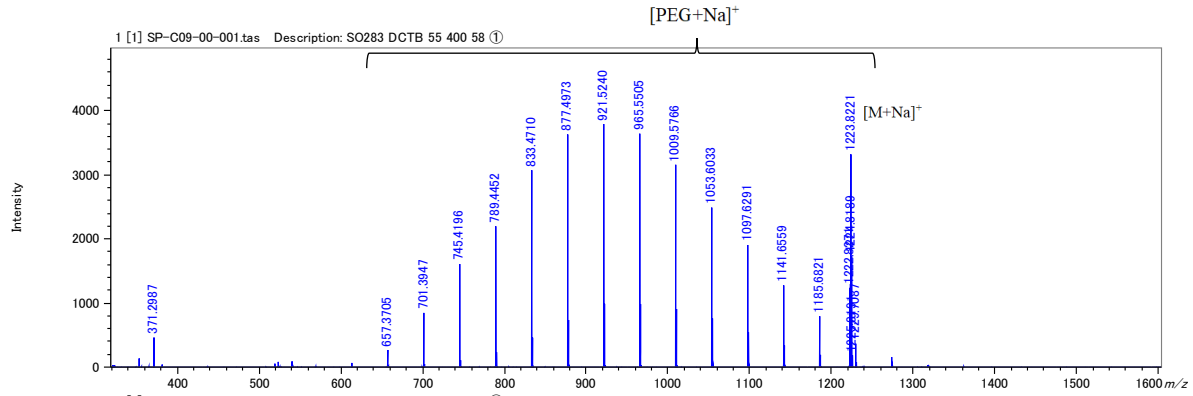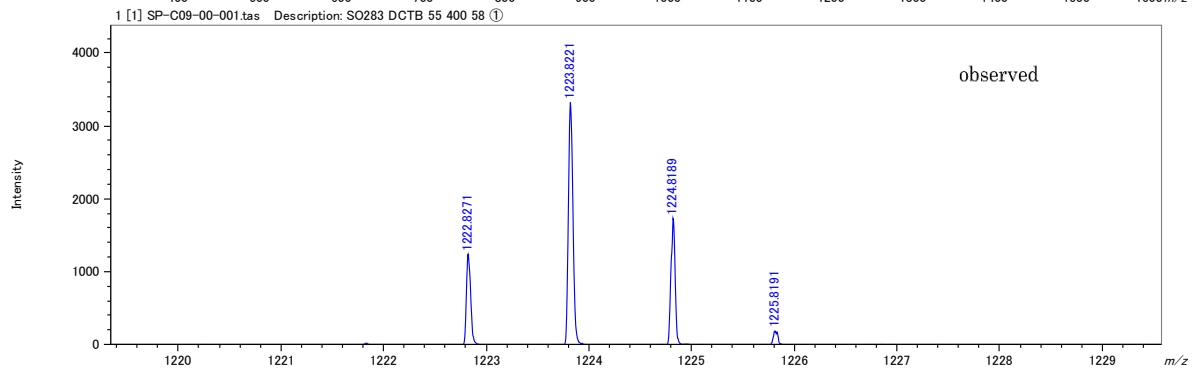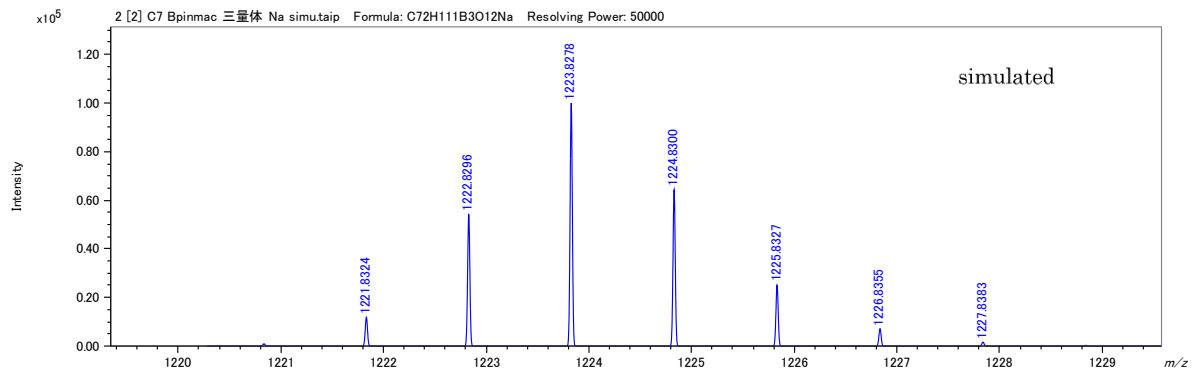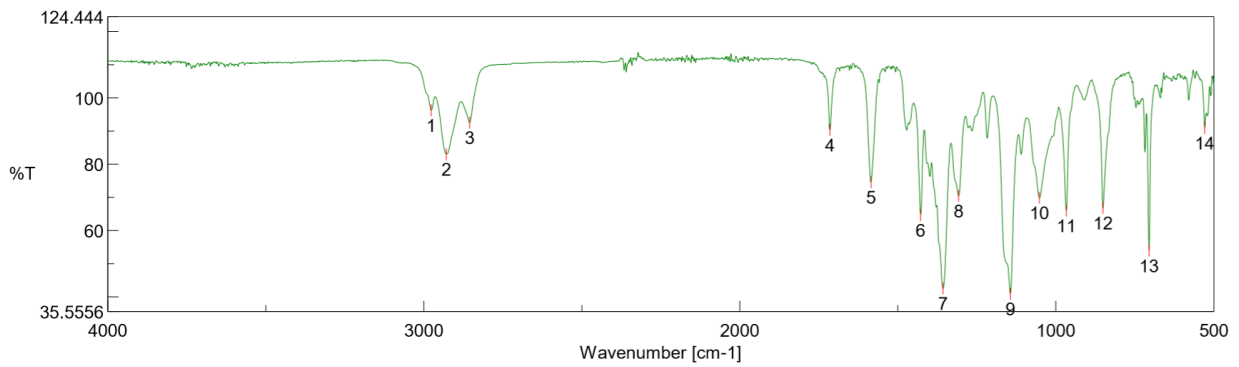

[ピーク検出結果]

| No. | 位置      | 強度      |
|-----|---------|---------|-----|---------|---------|-----|---------|---------|-----|---------|---------|
| 1   | 2976.59 | 96.2067 | 2   | 2928.86 | 83.0285 | 3   | 2855.1  | 92.4623 | 4   | 1714.89 | 90.2743 |
| 5   | 1585.2  | 74.5577 | 6   | 1428.03 | 64.6067 | 7   | 1357.16 | 42.5525 | 8   | 1307.5  | 70.3996 |
| 9   | 1144.06 | 40.9239 | 10  | 1051.98 | 69.8376 | 11  | 967.126 | 65.9684 | 12  | 850.936 | 66.7748 |
| 13  | 705.337 | 53.8714 | 14  | 529.364 | 90.8534 |     |         |         |     |         |         |

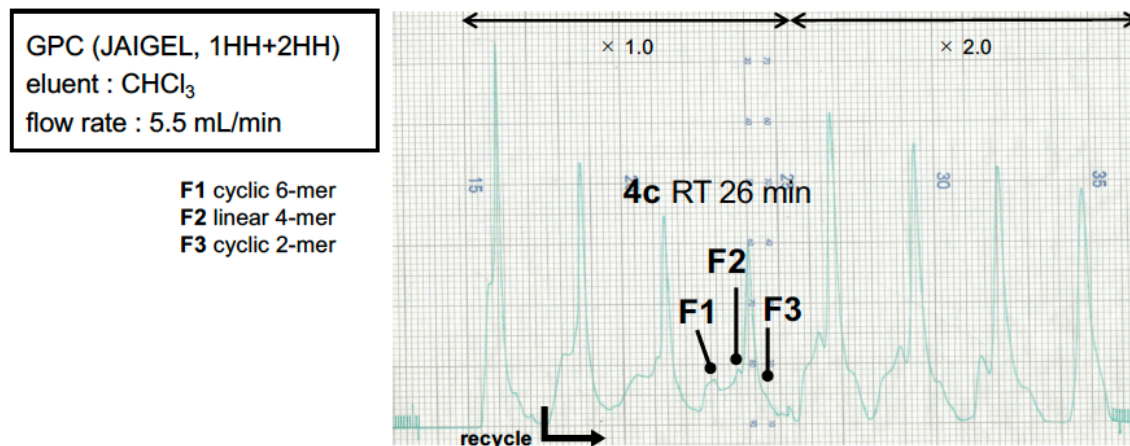

Fig. S6 GPC traces of crude **4c**.

2-7. <sup>1</sup>H NMR spectra of crude **3a** and **3c**

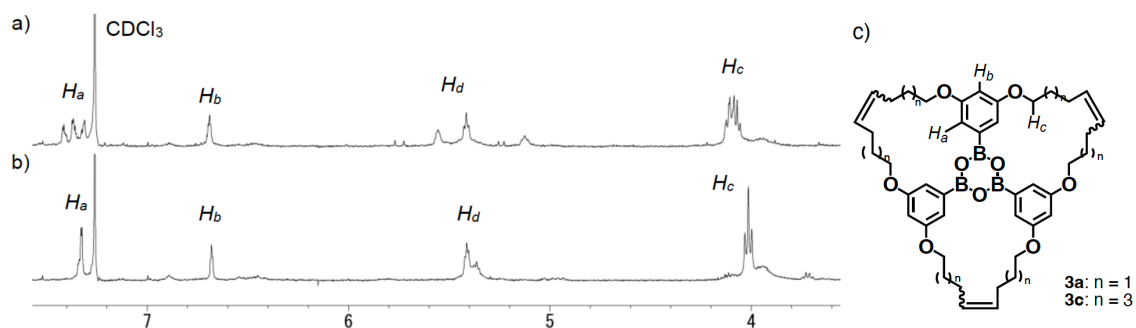

<sup>1</sup>H NMR spectra (400 MHz, CDCl<sub>3</sub>, r.t.) of a) crude **3a** and b) **3c**. c) Chemical structures of **3a** and **3c**.

2-8. Purification procedure and spectral data of **3c**

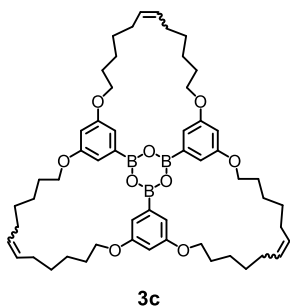

In a 50 mL flask, the crude of **3c** (72 mg) was dissolved in water saturated CHCl<sub>3</sub> and stirred at room temperature for 7 h. After that, a white precipitate was obtained (14.8 mg). Diffusion of toluene to a THF solution of the precipitate gave a small amount of solid **3c** including single crystals.

Physical data of **3c** (mixture of *cis/trans* isomers)

<sup>1</sup>H NMR (400 MHz, CDCl<sub>3</sub>): δ 7.34-7.33 (m, 6H), 6.68 (t, *J* = 2.3 Hz, 3H), 5.42-5.40, 5.38-5.35 (m, 6H), 4.02 (t, *J* = 6.9 Hz, 12H), 2.15-2.08 (m, 12H), 1.84 (quin, *J* = 6.9 Hz, 12H), 1.48 (m, 24H).

$^{13}\text{C}$  NMR (100 MHz,  $\text{CDCl}_3$ ):  $\delta$  160.3, 130.7, 130.3, 112.6, 107.5, 68.3, 68.0, 32.4, 29.8, 29.8, 29.4, 29.1, 27.4, 25.5, 25.3. The boron-bound carbons were not detected due to quadrupole relaxation.

$^{11}\text{B}$  NMR (160 MHz,  $\text{CDCl}_3$ ):  $\delta$  30.3

MS (MALDI $^+$ ):  $m/z$  calcd. for  $\text{C}_{54}\text{H}_{75}\text{B}_3\text{O}_9\text{Na}$ : 923.5607, found: 923.5546  $[\text{M}+\text{Na}]^+$ .

IR (ATR): 2933, 2913, 2851, 1594, 1428, 1322, 1257, 1159, 1059, 963, 846, 736, 670, 582.

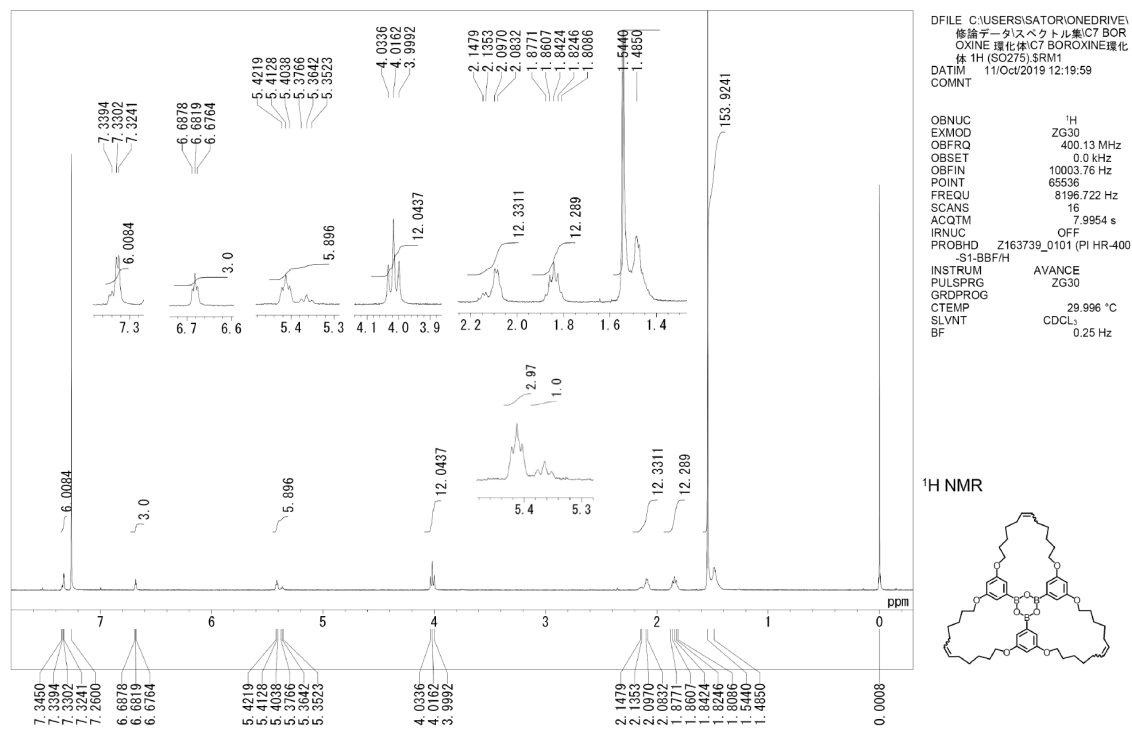

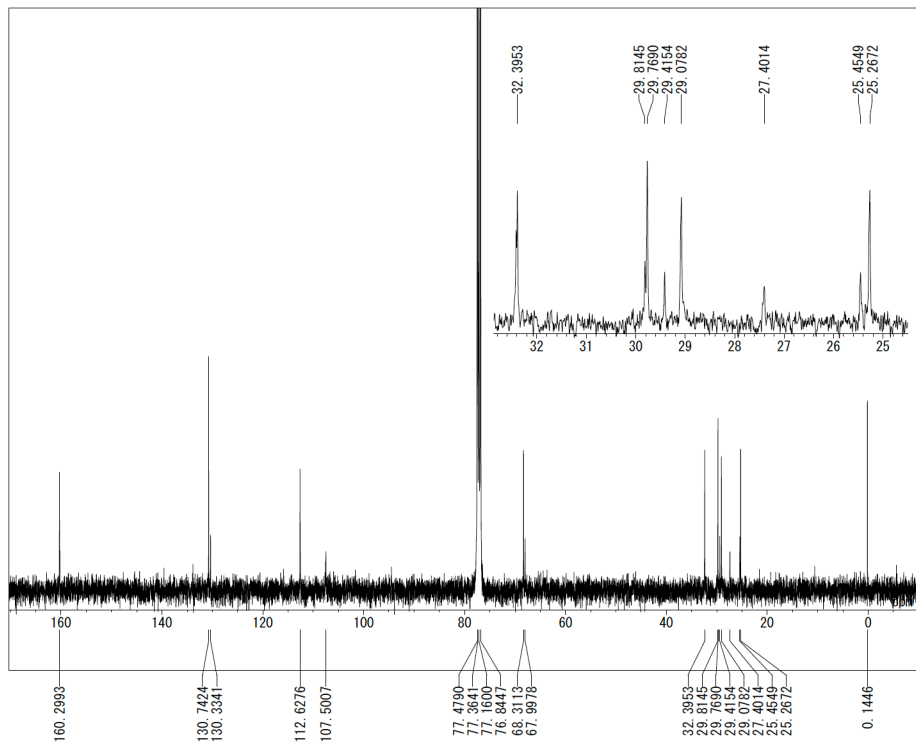

DFILE C:\Users\isator\OneDrive\修論データ\タスベクトル集\C7 boroxine 理  
 化体\C7 boroxine 理 体 13C (SO2  
 75) RM1  
 DATIM 20/Jan/2020 04:46:09  
 COMNT  
 OBNUC <sup>13</sup>C  
 EXMOD ZGPG30  
 OBFRQ 100.63 MHz  
 OBSET 0.0 kHz  
 OBFIN 9999.215 Hz  
 POINT 32788  
 FREQU 24038.46 Hz  
 SCANS 10000  
 ACQTM 1.3631 s  
 IRNUC OFF  
 PROBHD 5 MM PABBO BB-1H/D Z-  
 GRD Z104450  
 INSTRUM SPECT  
 PULSPRG ZGPG30  
 GRDPRG  
 CTEMP 26.85 °C  
 SLVNT CDCL<sub>3</sub>  
 BF 0.25 Hz  
 RGAIN 128

<sup>13</sup>C NMR

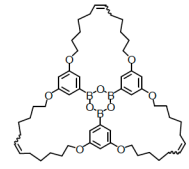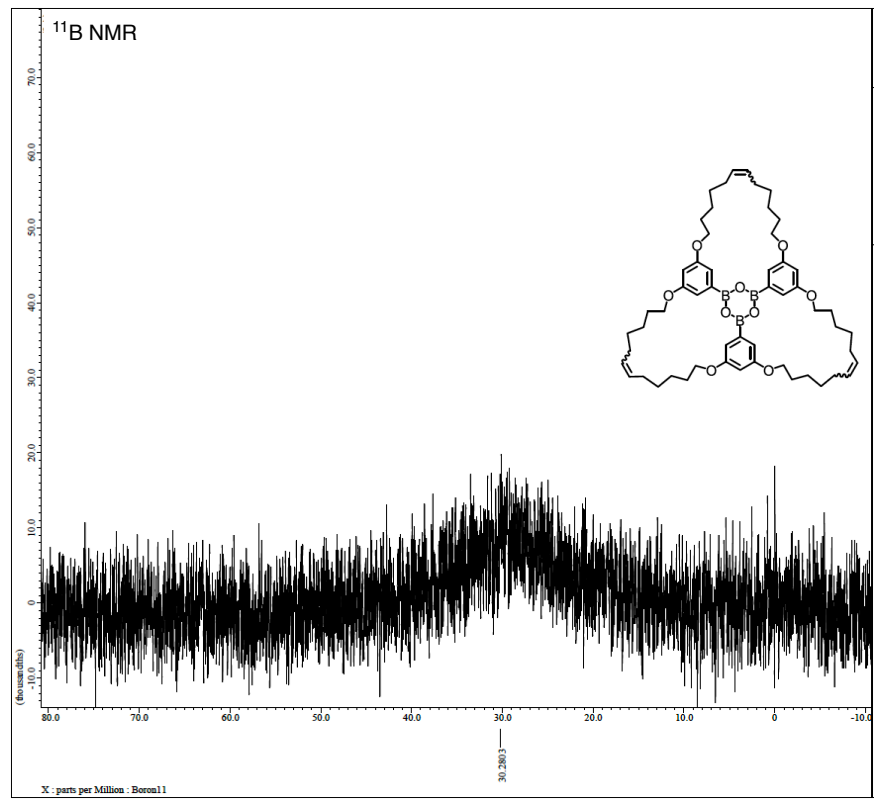

<sup>11</sup>B NMR

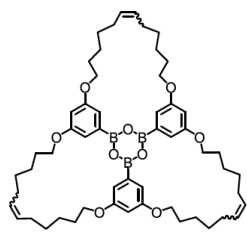

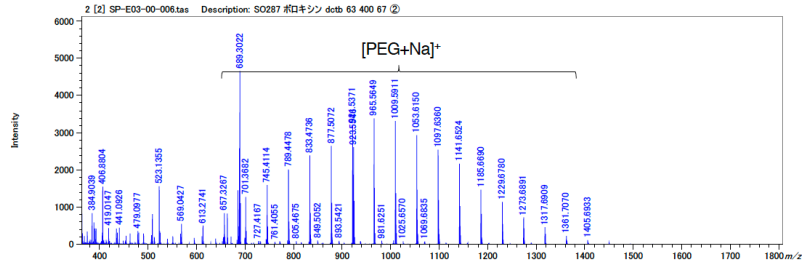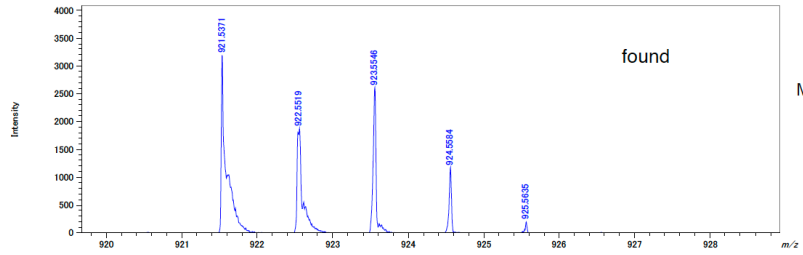

MALDI-TOF MS

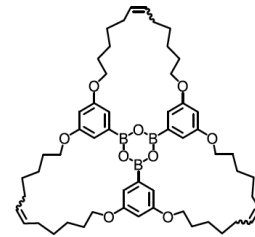

3c

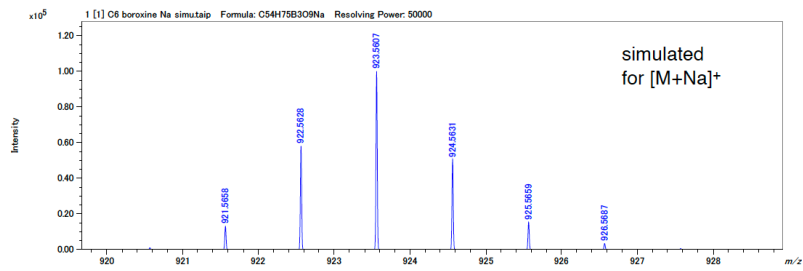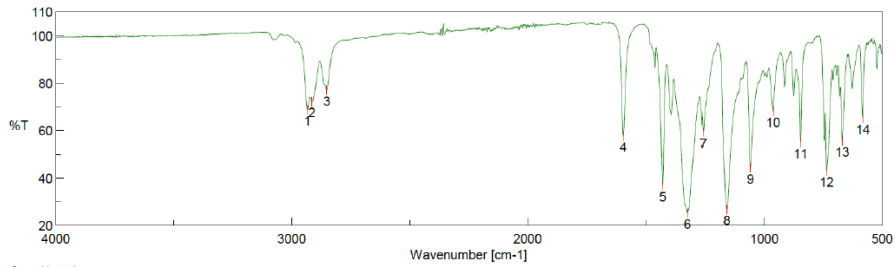

IR

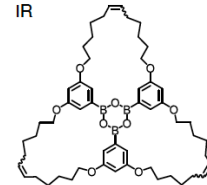

3c

[ピーク検出結果]

| No. | 位置      | 強度      |
|-----|---------|---------|-----|---------|---------|-----|---------|---------|-----|---------|---------|
| 1   | 2932.72 | 68.737  | 2   | 2913.43 | 72.074  | 3   | 2850.76 | 76.9041 | 4   | 1594.36 | 57.5267 |
| 5   | 1427.55 | 36.7389 | 6   | 1321.96 | 25.294  | 7   | 1257.36 | 59.3392 | 8   | 1159.01 | 26.726  |
| 9   | 1058.73 | 44.1204 | 10  | 962.787 | 67.9512 | 11  | 846.115 | 54.852  | 12  | 735.71  | 42.7695 |
| 13  | 669.66  | 55.4771 | 14  | 582.397 | 64.9391 |     |         |         |     |         |         |

### 3. Control experiments

#### 3-1. Olefin metathesis of boronic ester **1b-pin**

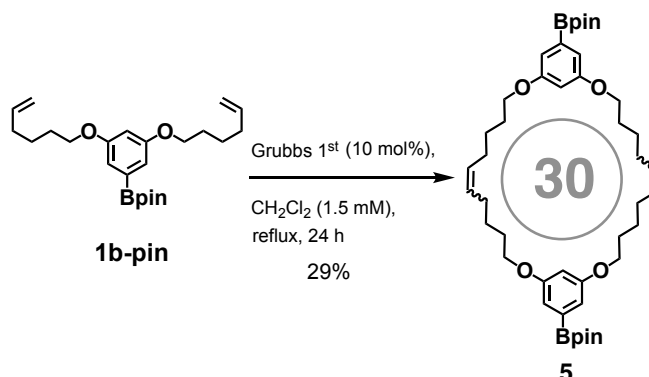

Boronic ester **1b-pin** (5.65 mg, 14  $\mu$ mol) was dissolved in dichloromethane (9.0 mL) and allowed to react with Grubbs 1<sup>st</sup> Generation catalyst (1.15 mg, 1.4  $\mu$ mol). The resulting mixture was refluxed for 24 h. Ethyl vinyl ether (50  $\mu$ L) was added and the mixture was stirred at room temperature for 2 h. After solvent was evaporated, the residue was purified by GPC to give **5** (3.02 mg, 58%).

Physical data of **5** (mixture of *cis/trans* isomers)

<sup>1</sup>H NMR (400 MHz, CDCl<sub>3</sub>):  $\delta$  6.92-6.90 (m, 4H), 6.60-6.55 (m, 2H), 5.43-5.38 (m, 4H), 3.99-3.94 (m, 8H), 2.11-2.02 (m, 8H), 1.79-1.70 (m, 8H), 1.56-1.49 (m, 8H), 1.33 (s, 24H).

<sup>13</sup>C NMR (100 MHz, CDCl<sub>3</sub>):  $\delta$  160.1, 130.5, 130.5, 130.0, 130.0, 112.9, 112.2, 112.0, 105.7, 105.4, 83.9, 67.9, 32.2, 32.2, 29.0, 28.8, 28.7, 27.0, 26.3, 26.2, 26.0, 25.0. The boron-bound carbons were not detected due to quadrupole relaxation.

<sup>11</sup>B NMR (160 MHz, CDCl<sub>3</sub>):  $\delta$  29.5

HRMS (MALDI<sup>+</sup>): *m/z* calcd. for C<sub>44</sub>H<sub>66</sub>B<sub>2</sub>O<sub>8</sub>Na: 767.4851, found: 767.4839 [M+Na]<sup>+</sup>.

IR (ATR): 2927, 2855, 1727, 1587, 1429, 1361, 1308, 1277, 1164, 1146, 1061, 969, 851, 706, cm<sup>-1</sup>.

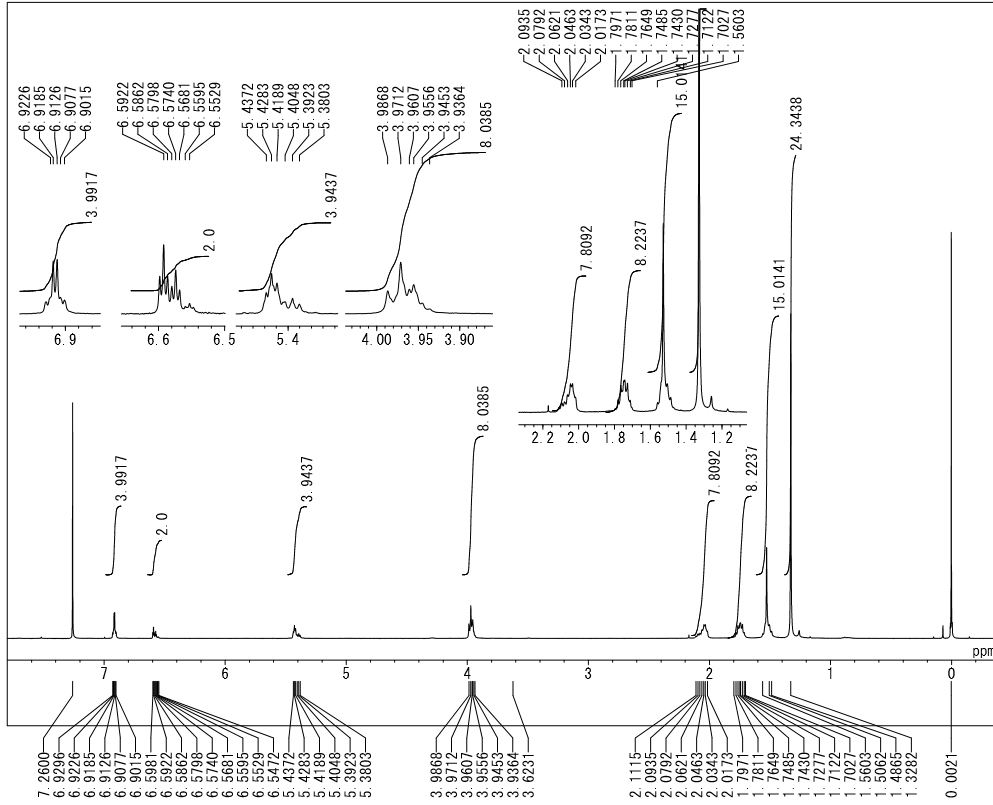

DFILE C:\USERS\ISATOR\IONEDRIVE\  
 修論データスペクトル集\C6 BPIN  
 環状二量体C6 BPIN環状二量体 1H  
 (SO335).RM1  
 DATIM 27/Dec/2019 16:55:00  
 COMNT

OBNUC <sup>1</sup>H  
 EXMOD ZG30  
 OBFRQ 400.13 MHz  
 OBSET 0.0 kHz  
 OBFIN 10003.76 Hz  
 POINT 65536  
 FREQU 8196.722 Hz  
 SCANS 16  
 ACQTM 7.9954 s  
 IRNUC OFF  
 PROBHD Z163739\_0101 (PI HR-400  
 S1-BBF/H  
 INSTRUM AVANCE  
 PULSPRG ZG30  
 GRDPROG  
 CTEMP 29.989 °C  
 SLVNT CDCL<sub>3</sub>  
 BF 0.25 Hz

<sup>1</sup>H NMR

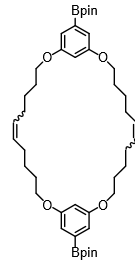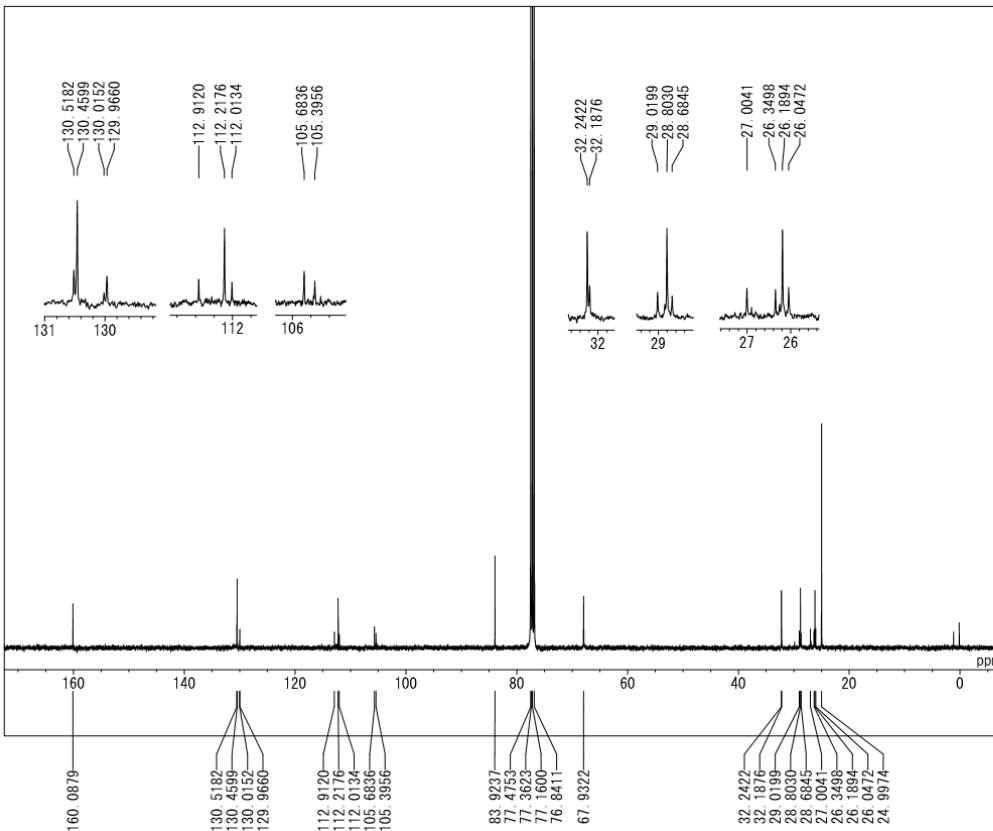

DFILE C:\USERS\ISATOR\IONEDRIVE\  
 修論データスペクトル集\C6 BPIN  
 環状二量体C6 BPIN環状二量体 13  
 C (335).RM1  
 DATIM 13/Jan/2020 09:40:36  
 COMNT

OBNUC <sup>13</sup>C  
 EXMOD ZGPG30  
 OBFRQ 100.63 MHz  
 OBSET 0.0 kHz  
 OBFIN 9999.209 Hz  
 POINT 32788  
 FREQU 24038.46 Hz  
 SCANS 8192  
 ACQTM 1.3631 s  
 IRNUC OFF  
 PROBHD 5 MM PABBO BB-1H/D Z-  
 GRD Z104450  
 INSTRUM SPECT  
 PULSPRG ZGPG30  
 GRDPROG  
 CTEMP 26.85 °C  
 SLVNT CDCL<sub>3</sub>  
 BF 0.25 Hz  
 RGAIN 72

<sup>13</sup>C NMR

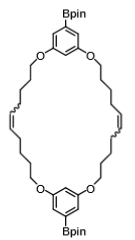

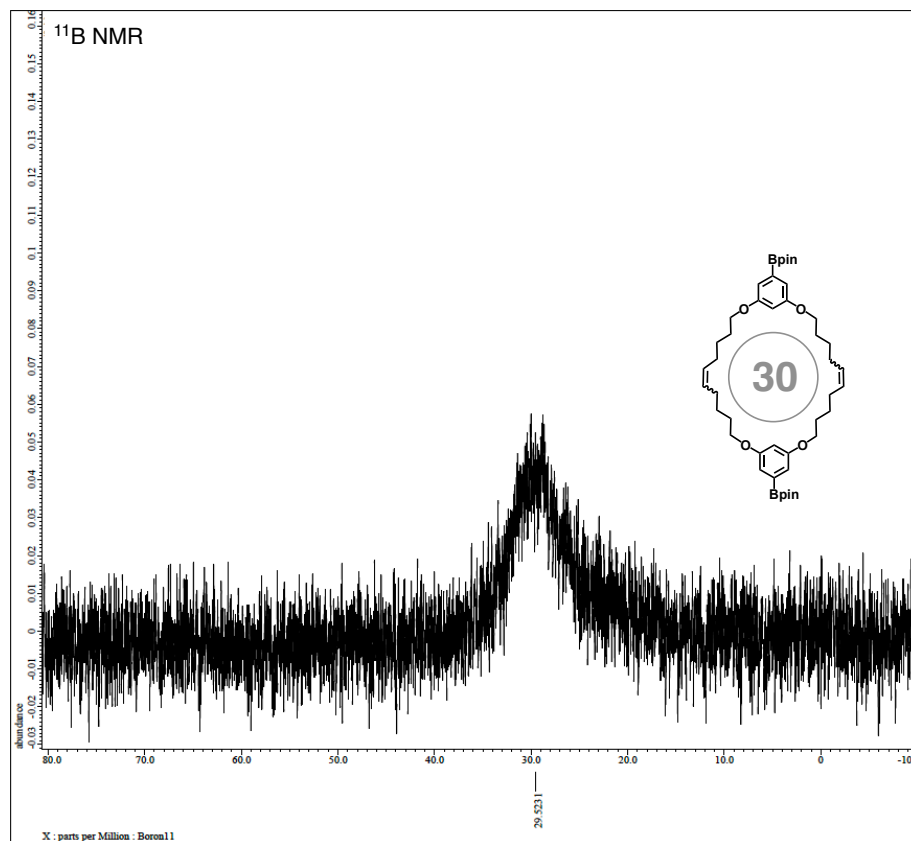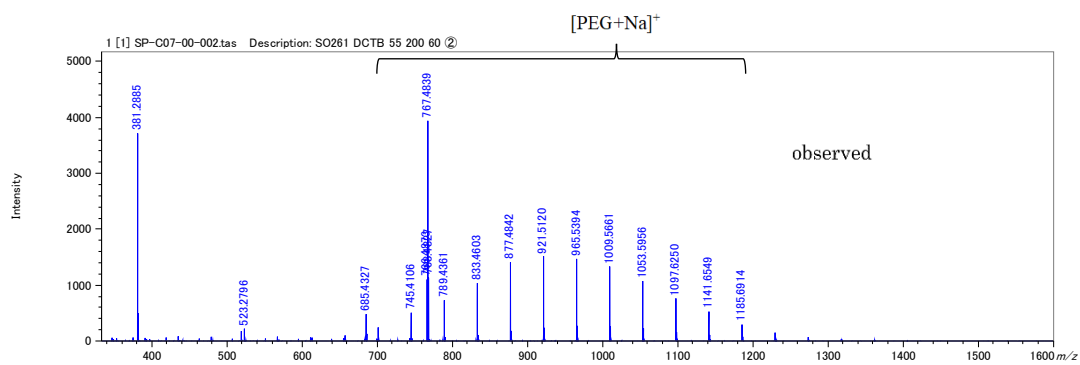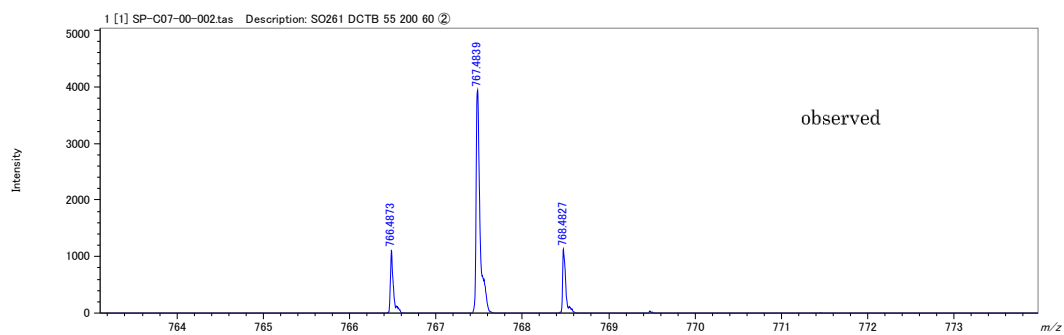



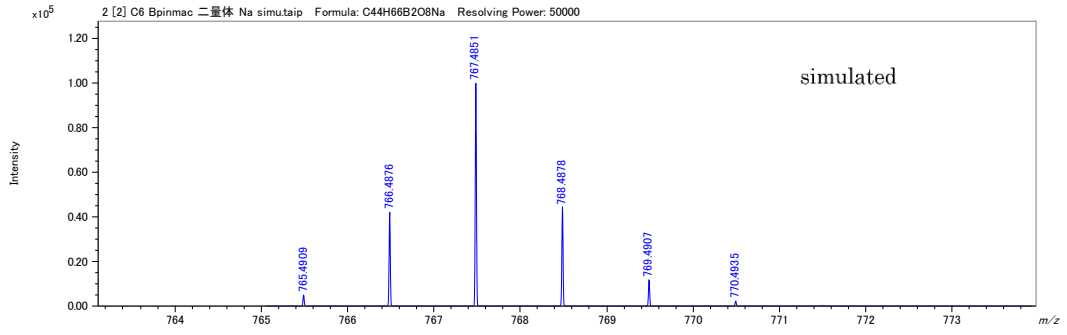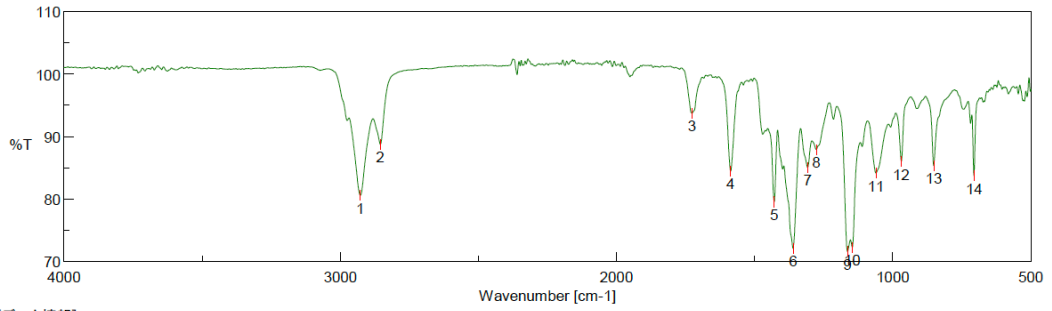

[データ情報]  
作成日時 2020/02/20 13:32

データタイプ 等間隔データ  
横軸 Wavenumber [cm-1]  
縦軸 %T  
スタート 499.473 cm-1  
エンド 4000.6 cm-1  
データ間隔 0.964233 cm-1  
データ数 3632

[ピーク検出結果]

| No. | 位置      | 強度      |
|-----|---------|---------|-----|---------|---------|-----|---------|---------|-----|---------|---------|
| 1   | 2927.41 | 80.5796 | 2   | 2855.1  | 88.7321 | 3   | 1726.94 | 93.765  | 4   | 1587.13 | 84.4521 |
| 5   | 1428.99 | 79.5234 | 6   | 1360.53 | 72.0969 | 7   | 1308.46 | 85.0571 | 8   | 1276.65 | 87.9349 |
| 9   | 1163.83 | 71.5782 | 10  | 1146.47 | 72.2464 | 11  | 1060.66 | 84.1537 | 12  | 969.055 | 86.007  |
| 13  | 851.418 | 85.3279 | 14  | 705.819 | 83.7107 |     |         |         |     |         |         |

GPC (JAIGEL, 1HH+2HH)  
 eluent : CHCl<sub>3</sub>  
 flow rate : 5.5 mL/min

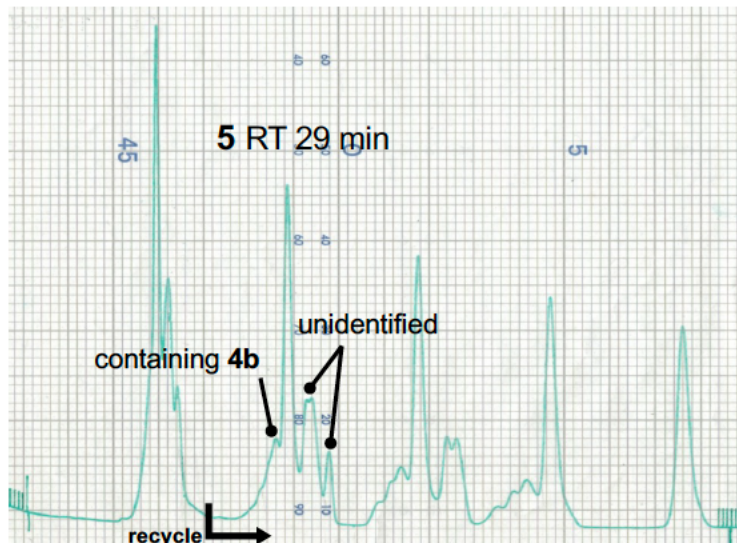

MALDI-TOF MS of crude mixture (Matrix: DCTB)

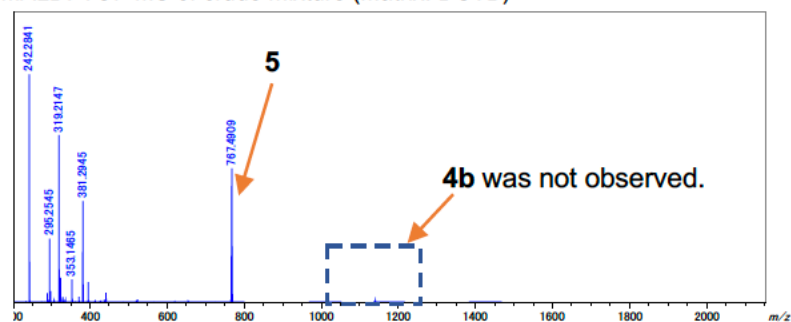

Fig. S7 GPC traces of crude **5** and MALDI-TOF MS analysis of crude mixture.

### 3-2. Olefin metathesis of a 1.1:1.0 mixture of **1b** and **2b**

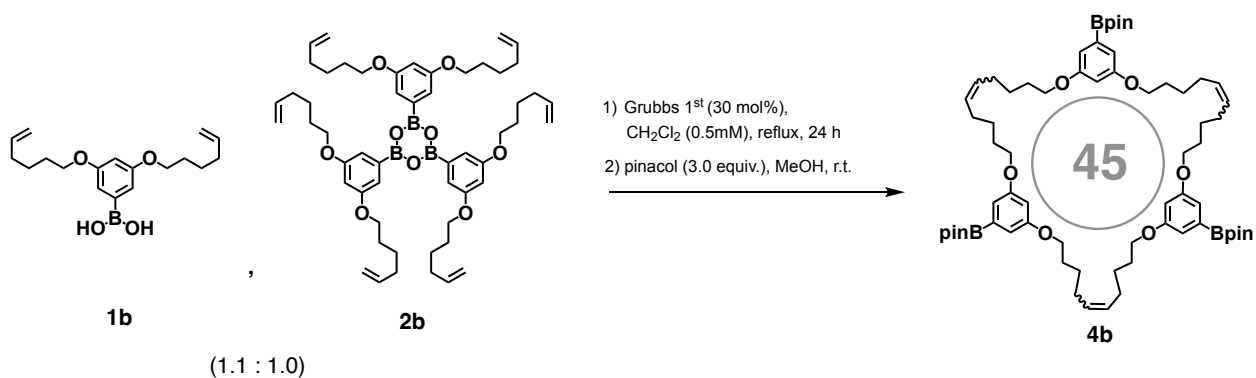

A 1.1:1.0 mixture of **1b** and **2b** (1.75 mg) was dissolved in dichloromethane (4.0 mL) and allowed to react with Grubbs 1<sup>st</sup> Generation catalyst (0.469 mg, 0.57 μmol). The resulting mixture was refluxed for 24 h. Ethyl vinyl ether (25 μL) was added and the mixture was stirred at room temperature for 2 h. After solvent was evaporated, the residue was purified by GPC to give **4b** (1.72 mg, 76%).

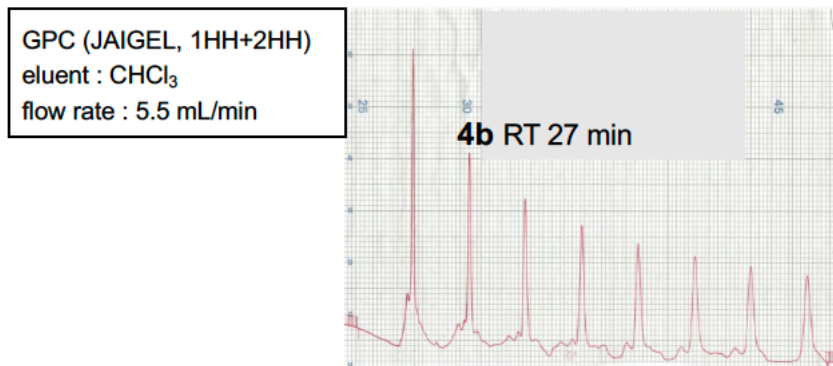

Fig. S8 GPC traces of crude **4b** prepared from a 1.1:1.0 mixture of **1b** and **2b**.

### 3-3. Hydrogenation of boroxine **2b**

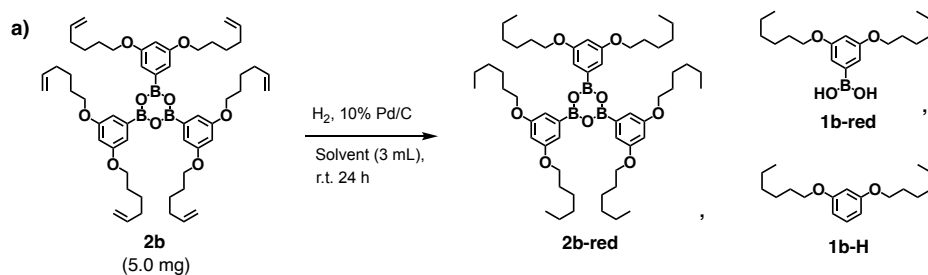

| entry | solvent | <b>1b-H</b> |
|-------|---------|-------------|
| 1     | EtOAc   | 31%         |
| 2     | THF     | 30%         |
| 3*    | EtOAc   | quant.      |

\*MS4A was added.

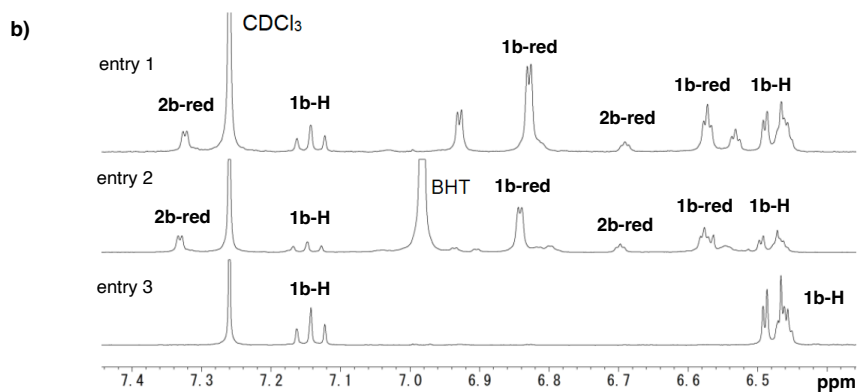

Fig. S9 a) Examination of reaction solvents of hydrogenation of **2b**. b) <sup>1</sup>H NMR spectra (400 MHz, 303 K, CDCl<sub>3</sub>) of crude of entry 1, 2, and 3.

## 4. Post-modification of Macrocycles

### 4-1. Hydrogenation of Macrocycle **4a** to **6a**

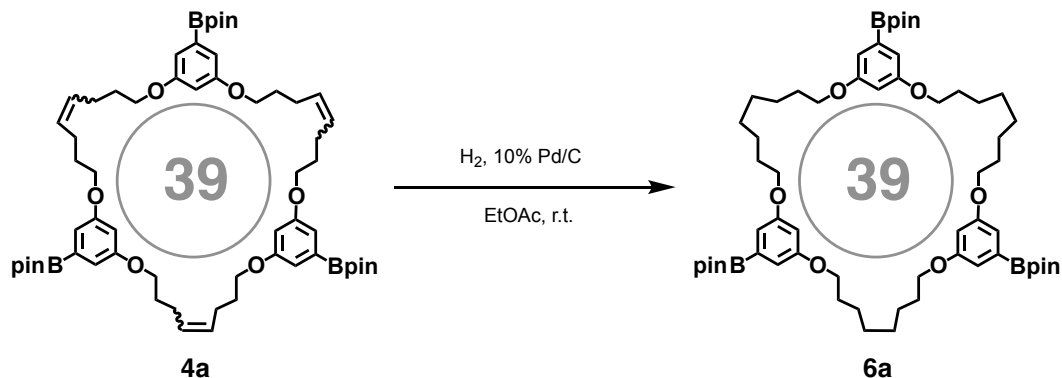

Macrocycle **4a** (1.75 mg, 1.69  $\mu\text{mol}$ ) and palladium (10%) on charcoal were mixed in EtOAc (1.0 mL). Under hydrogen, the solution was stirred for 18 h and then filtered through Celite. The solvent was evaporated to afford the desired **6a** quantitatively.

Physical data of **6a**

$^1\text{H}$  NMR (400 MHz,  $\text{CDCl}_3$ ):  $\delta$  6.92 (d,  $J = 2.3$  Hz, 6H), 6.55 (t,  $J = 2.4$  Hz, 3H), 3.96 (t,  $J = 6.4$  Hz, 12H), 1.75 (quin,  $J = 6.8$  Hz, 12H), 1.48-1.42 (m, 12H) 1.40-1.36 (m, 12H), 1.32 (s, 36H).

$^{13}\text{C}$  NMR (100 MHz,  $\text{CDCl}_3$ ):  $\delta$  160.1, 112.6, 105.3, 83.9, 68.0, 29.4, 29.3, 26.0, 25.0. The boron-bound carbons were not detected due to quadrupole relaxation.

$^{11}\text{B}$  NMR (160 MHz,  $\text{CDCl}_3$ ):  $\delta$  30.2

HRMS (MALDI $^+$ ):  $m/z$  calcd. for  $\text{C}_{60}\text{H}_{93}\text{B}_3\text{O}_{12}\text{Na}$ : 1061.6865, found: 1061.6793  $[\text{M}+\text{Na}]^+$ .

IR (ATR): 2926, 2855, 1715, 1586, 1466, 1429, 1360, 1308, 1263, 1146, 1050, 968, 851, 819, 706  $\text{cm}^{-1}$ .

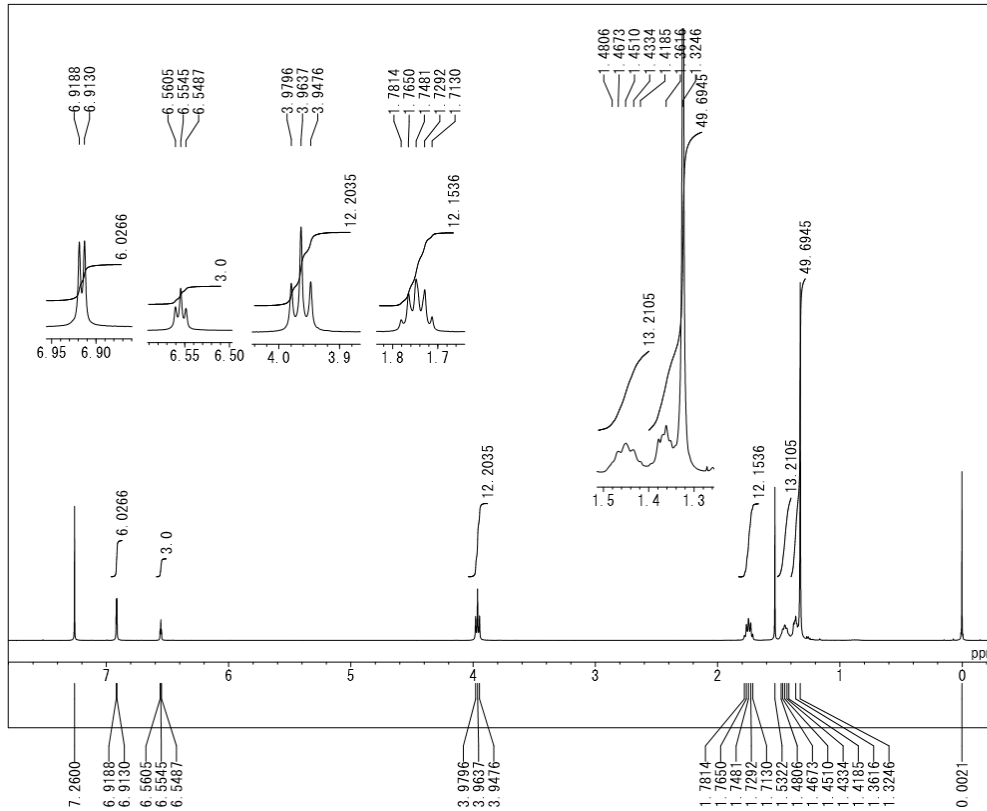

DFILE C:\Users\ator\OneDrive\修論データ\1スベクトル集\C5 BpinMac 還元体\C5 BpinMac 還元体 1H (SO352).RM1  
 DATIM 26/Jan/2020 18:00:09  
 COMNT

OBNUC <sup>1</sup>H  
 EXMOD ZG30  
 OBFRO 400.13 MHz  
 OBSET 0.0 kHz  
 OBFIN 10003.76 Hz  
 POINT 65536  
 FREQU 8196.722 Hz  
 SCANS 16  
 ACQTM 7.9954 s  
 IRNUC OFF  
 PROBHD Z163739\_0101 (PI HR-400 -S1-BBF/H)  
 INSTRUM AVANCE  
 PULSPRG ZG30  
 GRDPRG  
 CTEMP 29.9062 °C  
 SLVNT CDCL<sub>3</sub>  
 BF 0.25 Hz

<sup>1</sup>H NMR

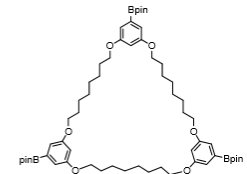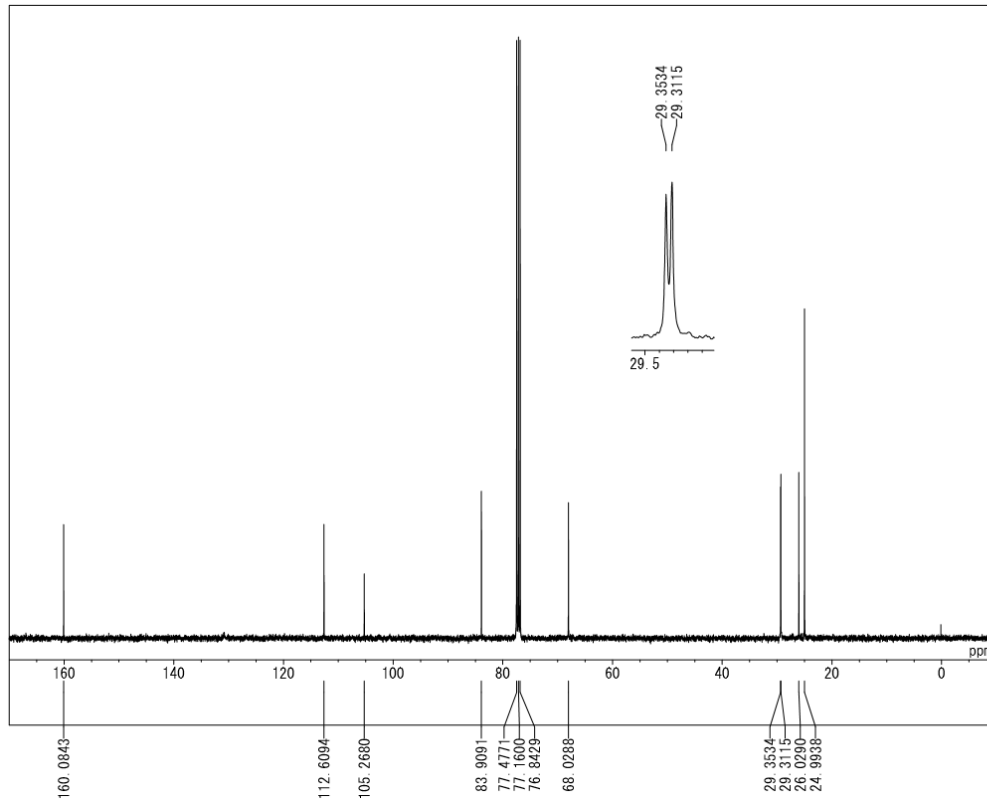

DFILE C:\USERS\ATOR\ONEDRIVE\修論データ\1スベクトル集\C5 BPIN MAC 還元体\C5 BPINMAC 還元体 13C (SO352).SRM1  
 DATIM 27/Jan/2020 02:24:07  
 COMNT

OBNUC <sup>13</sup>C  
 EXMOD ZGPG30  
 OBFRO 100.63 MHz  
 OBSET 0.0 kHz  
 OBFIN 9999.211 Hz  
 POINT 32768  
 FREQU 24038.46 Hz  
 SCANS 1024  
 ACQTM 1.3631 s  
 IRNUC OFF  
 PROBHD 5 MM PABBO BB-1H/D Z-GRD Z104450  
 INSTRUM SPECT  
 PULSPRG ZGPG30  
 GRDPRG  
 CTEMP 26.85 °C  
 SLVNT CDCL<sub>3</sub>  
 BF 0.25 Hz  
 RGAIN 114

<sup>13</sup>C NMR

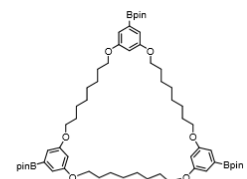

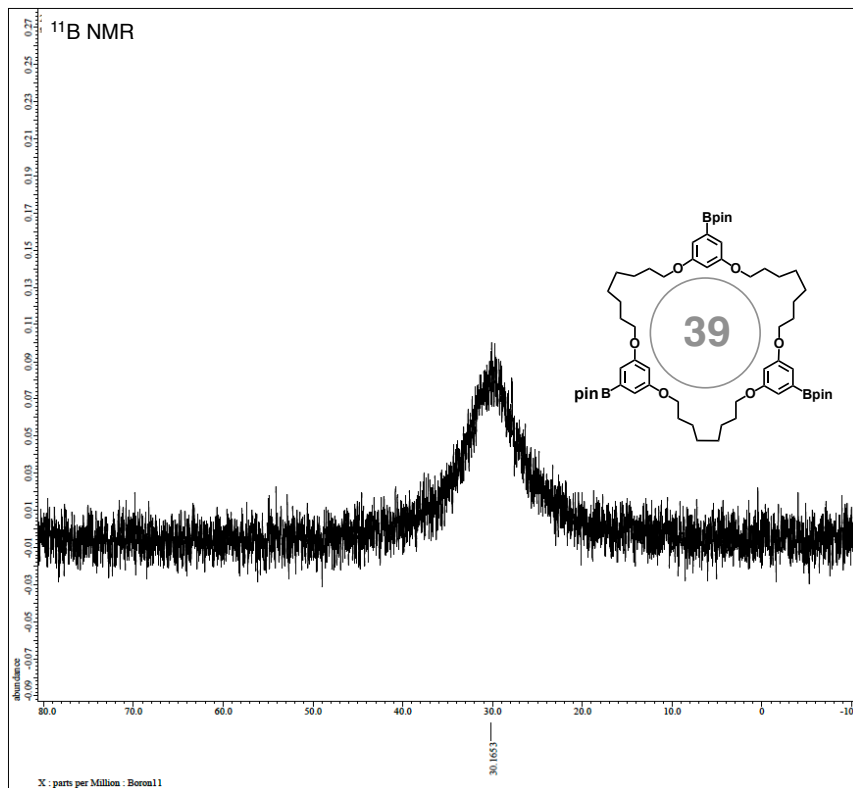

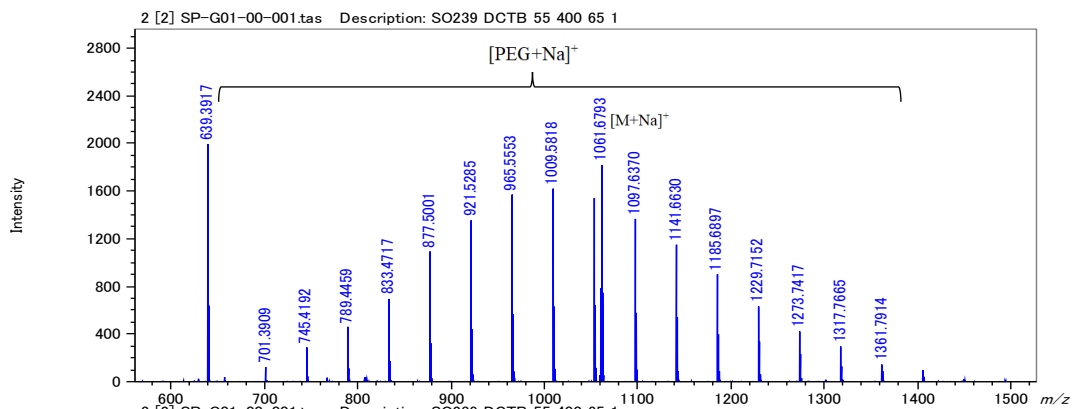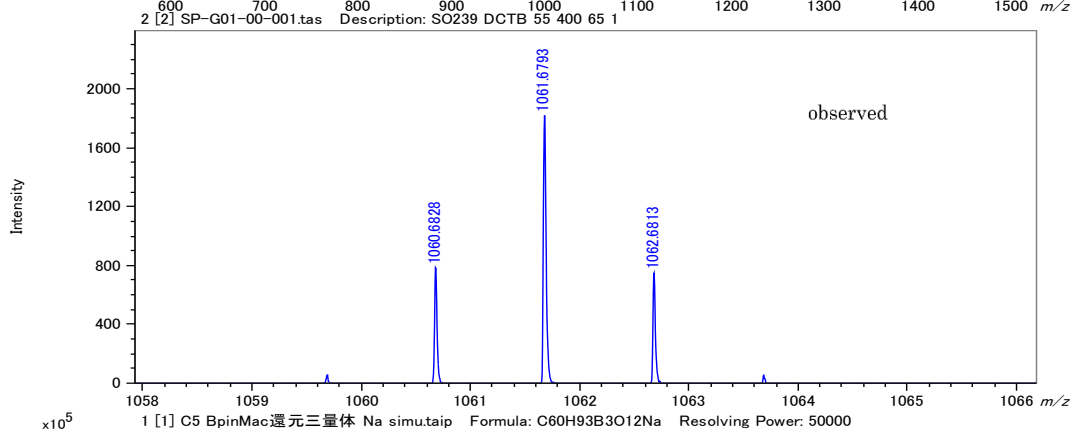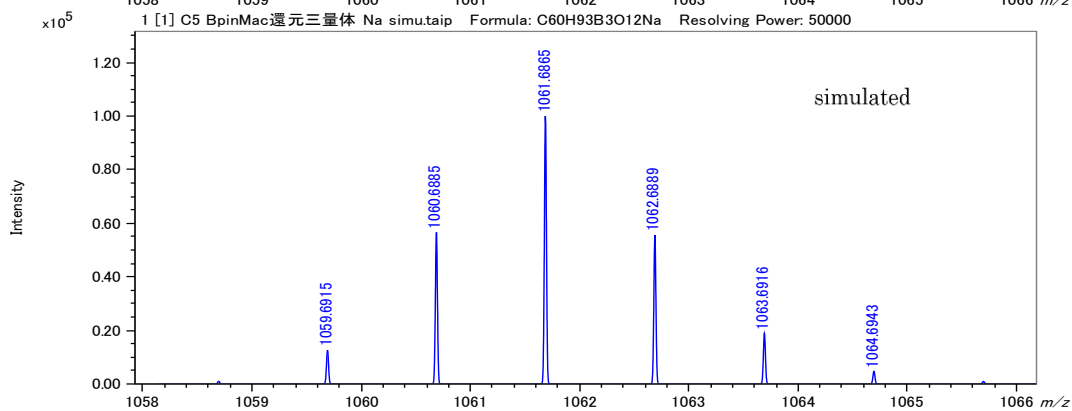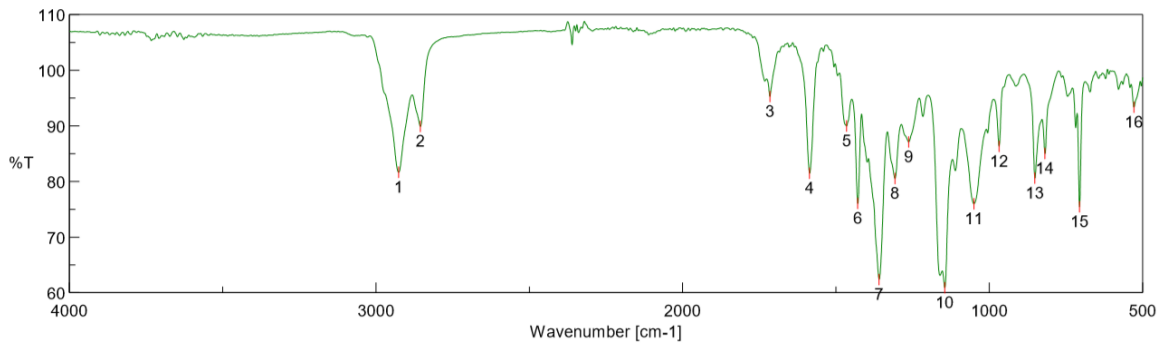

[ピーク検出結果]

| No. | 位置      | 強度      | No. | 位置      | 強度      | No. | 位置      | 強度      |
|-----|---------|---------|-----|---------|---------|-----|---------|---------|
| 1   | 2926.45 | 81.6267 | 3   | 1715.37 | 95.2507 | 4   | 1586.16 | 81.4512 |
| 5   | 1465.63 | 89.9518 | 7   | 1359.57 | 62.3601 | 8   | 1307.5  | 80.5168 |
| 9   | 1263.15 | 87.1004 | 10  | 1145.51 | 60.8808 | 11  | 1050.05 | 75.9675 |
| 13  | 851.418 | 80.5877 | 14  | 818.634 | 85.0107 | 12  | 968.09  | 86.3026 |
|     |         |         | 15  | 705.819 | 75.4471 | 16  | 528.4   | 93.3206 |

## 4-2. Hydrogenation of Macrocycle **4b** to **6b**

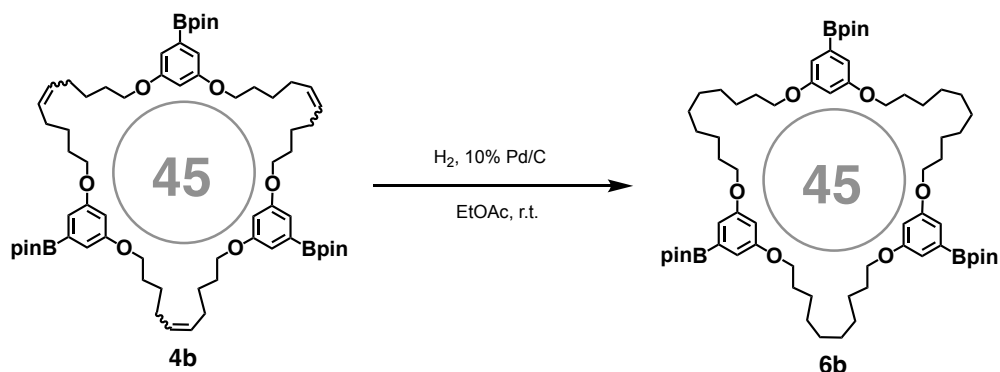

Macrocycle **4b** (72 mg, 64.5  $\mu\text{mol}$ ) and palladium (10%) on charcoal were mixed in EtOAc (8.0 mL). Under hydrogen, the solution was stirred for 24 h and then filtered through Celite. The solvent was evaporated to afford the desired **6b** quantitatively.

Physical data of **6b**

<sup>1</sup>H NMR (400 MHz, CDCl<sub>3</sub>):  $\delta$  6.92 (d,  $J = 2.4$  Hz, 6H), 6.56 (t,  $J = 2.3$  Hz, 3H), 3.96 (t,  $J = 6.4$  Hz, 12H), 1.74 (quin,  $J = 6.9$  Hz, 12H), 1.44 (quin,  $J = 7.2$  Hz, 12H), 1.33 (s, 36H), 1.33-1.31 (m, 24H).

<sup>13</sup>C NMR (100 MHz, CDCl<sub>3</sub>):  $\delta$  160.1, 112.6, 105.3, 83.9, 68.1, 29.5, 29.4, 29.4, 26.1, 25.0. The boron-bound carbons were not detected due to quadrupole relaxation.

<sup>11</sup>B NMR (160 MHz, CDCl<sub>3</sub>):  $\delta$  30.1

HRMS (MALDI<sup>+</sup>):  $m/z$  calcd. for C<sub>66</sub>H<sub>105</sub>B<sub>3</sub>O<sub>12</sub>Na: 1145.7806, found: 1145.7764 [M+Na]<sup>+</sup>.

IR (ATR): 2977, 2929, 2855, 1586, 1472, 1429, 1361, 1308, 1165, 1146, 1052, 968, 852, 707 cm<sup>-1</sup>.



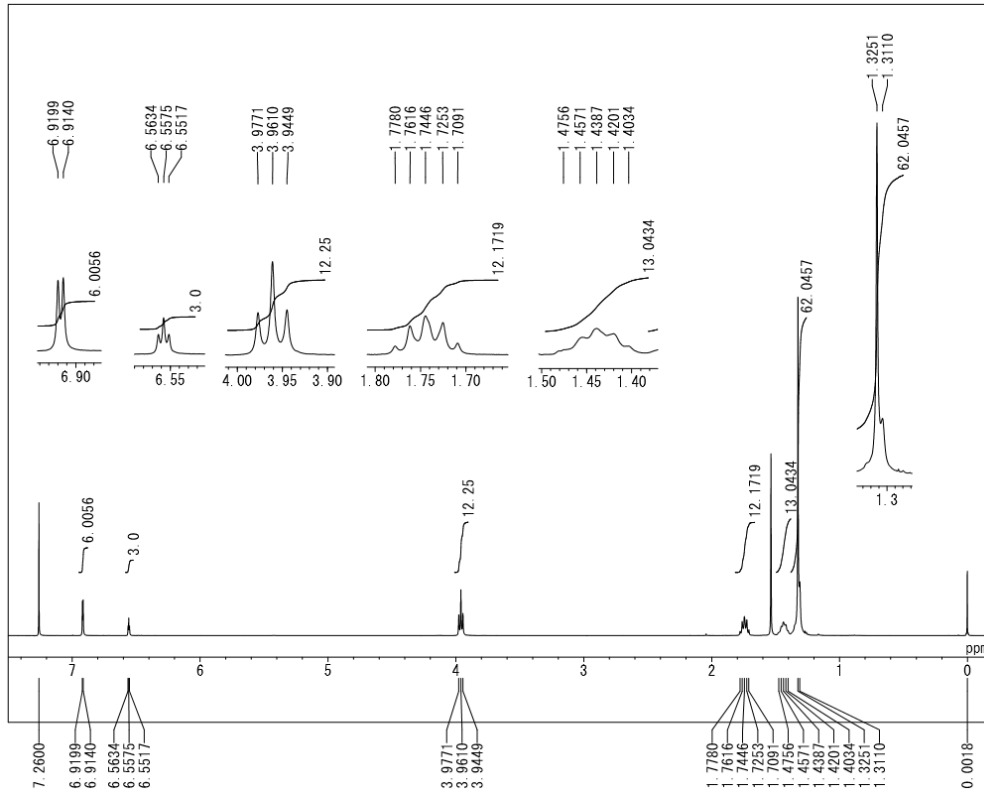

DFILE C:\USERS\SATORIONEDRIVE\  
 修論データスペクトル集\C6 BPIN  
 MAC 還元体\C6 BPINMAC 還元体  
 1H (SQ323) RM1  
 DATIM 12/Nov/2019 20:18:56  
 COMNT

OBNUC <sup>1</sup>H  
 EXMOD ZG30  
 OBFRQ 400.13 MHz  
 OBSET 0.0 kHz  
 OBFIN 10003.76 Hz  
 POINT 65536  
 FREQU 8196.722 Hz  
 SCANS 16  
 ACQTM 7.9954 s  
 IRNUC OFF  
 PROBHD Z163739\_0101 (PI HR-400  
 -S1-BBF/H  
 INSTRUM AVANCE  
 PULSPRG ZG30  
 GRDPRG  
 CTEMP 29.988 °C  
 SLVNT CDCL<sub>3</sub>  
 BF 0.25 Hz

<sup>1</sup>H NMR

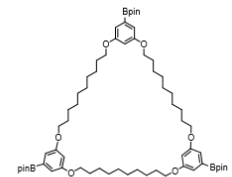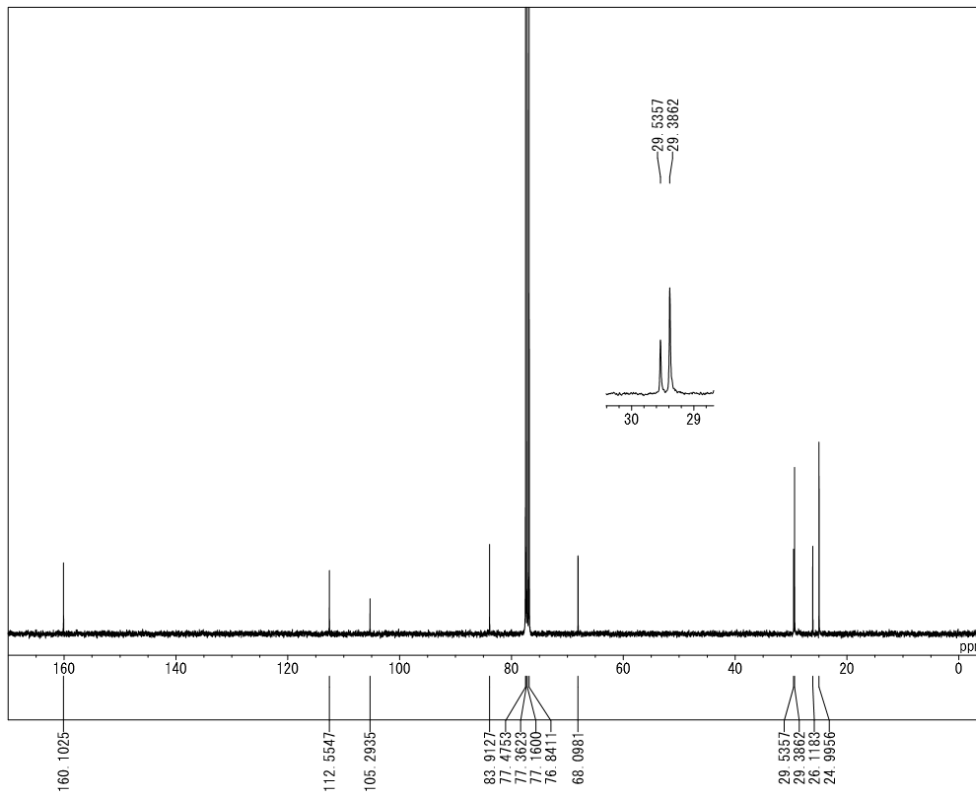

DFILE C:\USERS\SATORIONEDRIVE\  
 修論データスペクトル集\C6 BPIN  
 MAC 還元体\C6 BPINMAC 還元体  
 13C (SQ323) SRM1  
 DATIM 15/Nov/2019 04:05:56  
 COMNT

OBNUC <sup>13</sup>C  
 EXMOD ZGPG30  
 OBFRQ 100.63 MHz  
 OBSET 0.0 kHz  
 OBFIN 9999.209 Hz  
 POINT 32768  
 FREQU 24038.46 Hz  
 SCANS 2048  
 ACQTM 1.3631 s  
 IRNUC OFF  
 PROBHD 5 MM PABBO BB-1H/D Z-  
 GRD Z104450  
 INSTRUM SPECT  
 PULSPRG ZGPG30  
 GRDPRG  
 CTEMP 400.01 °C  
 SLVNT CDCL<sub>3</sub>  
 BF 0.25 Hz  
 RGAIN 64

<sup>13</sup>C NMR

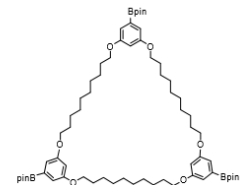

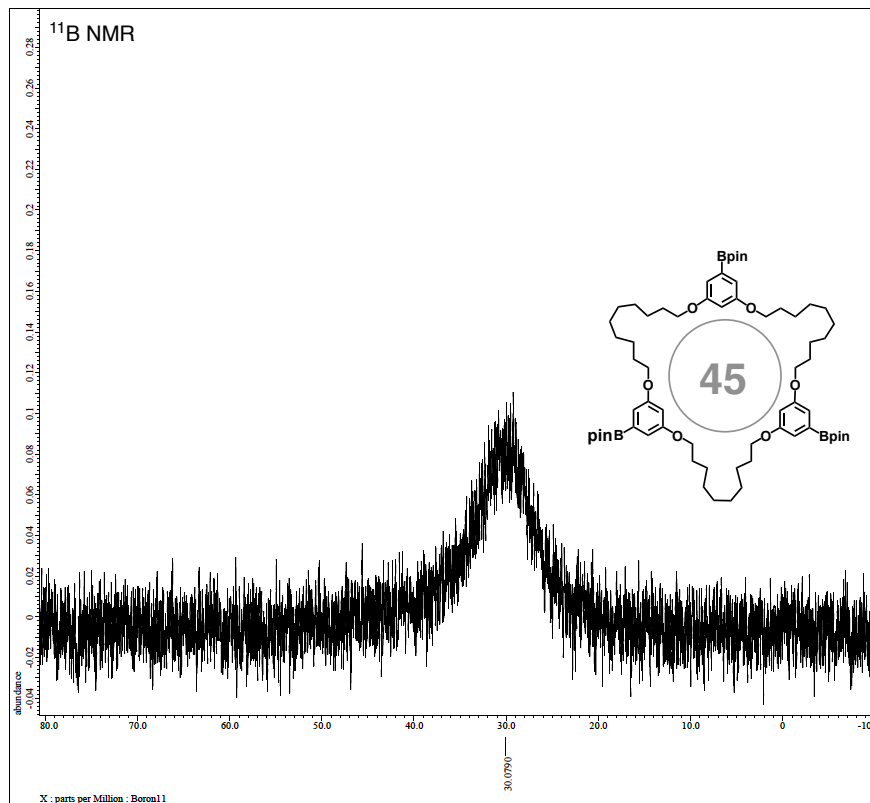

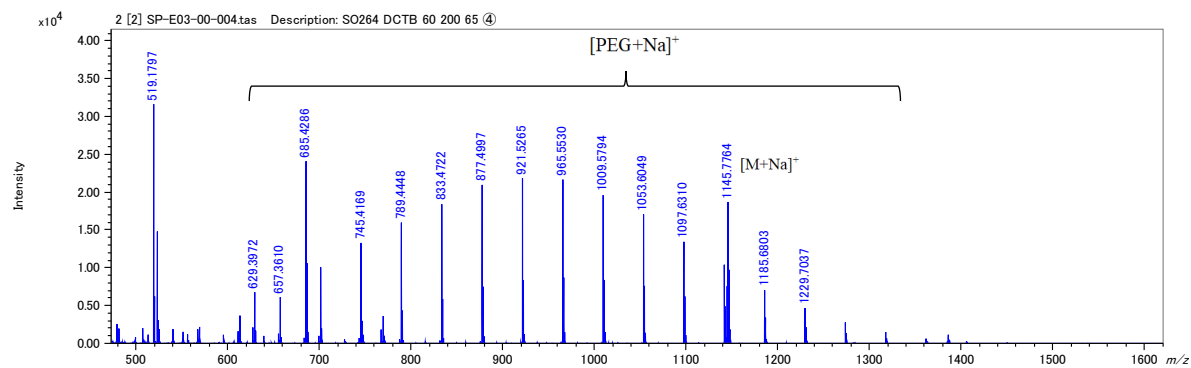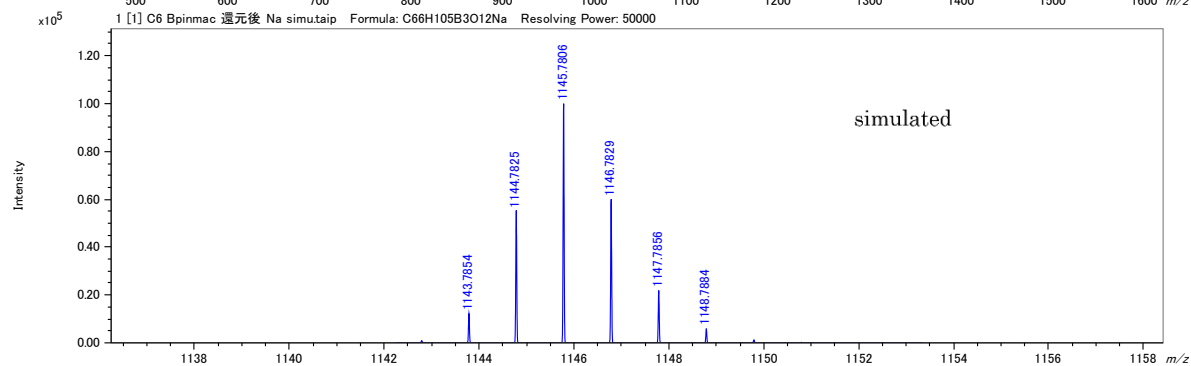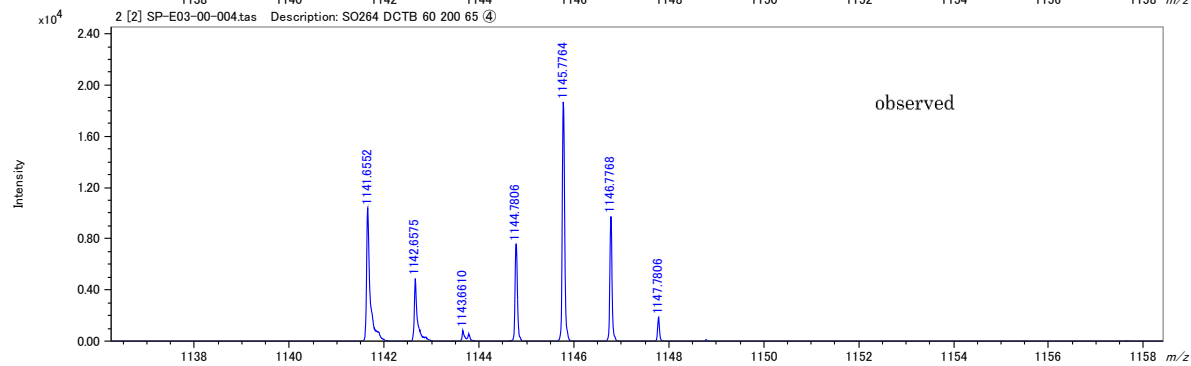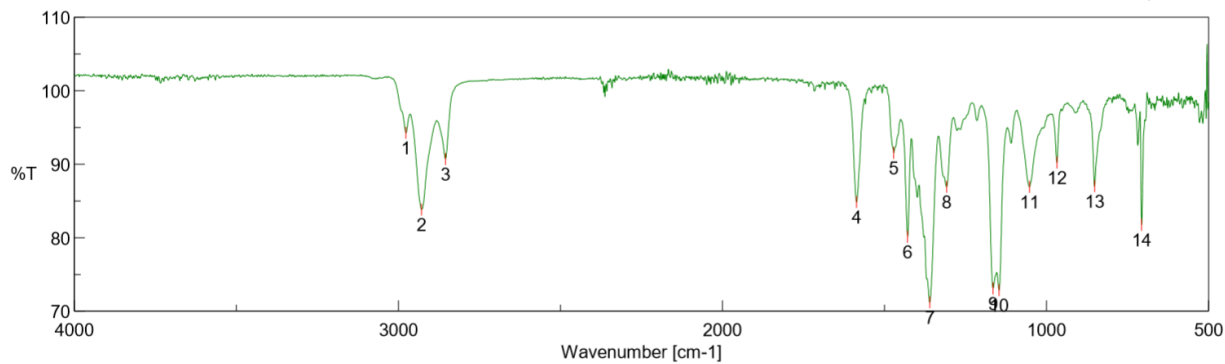

[ピーク検出結果]

| No. | 位置      | 強度      |
|-----|---------|---------|-----|---------|---------|-----|---------|---------|-----|---------|---------|
| 1   | 2976.59 | 94.2534 | 2   | 2928.86 | 83.825  | 3   | 2854.61 | 90.6917 | 4   | 1586.16 | 84.8302 |
| 5   | 1471.9  | 91.5132 | 6   | 1428.99 | 80.1069 | 7   | 1360.53 | 71.1812 | 8   | 1308.46 | 86.9014 |
| 9   | 1165.28 | 73.0807 | 10  | 1146.47 | 72.8554 | 11  | 1052.46 | 86.9144 | 12  | 968.09  | 90.2161 |
| 13  | 851.9   | 86.9928 | 14  | 706.783 | 81.7383 |     |         |         |     |         |         |

### 4-3. Hydrogenation of Macrocycle **4c** to **6c**

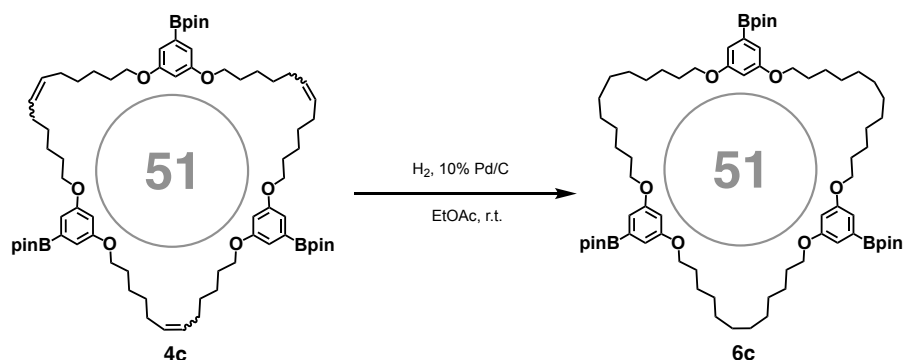

Macrocycle **4c** (39.2 mg, 32.6  $\mu\text{mol}$ ) and palladium (10%) on charcoal were mixed in EtOAc (8.0 mL). Under hydrogen, the solution was stirred for 19 h and then filtered through Celite. The solvent was evaporated to afford the desired **6c** quantitatively.

Physical data of **6c**

<sup>1</sup>H NMR (400 MHz, CDCl<sub>3</sub>):  $\delta$  6.92 (d,  $J = 2.3$  Hz, 6H), 6.56 (t,  $J = 2.3$  Hz, 3H), 3.96 (t,  $J = 6.4$  Hz, 12H), 1.75 (quin,  $J = 6.9$  Hz, 12H), 1.47-1.40 (m, 12H), 1.33 (s, 36H), 1.33-1.28 (m, 36H).

<sup>13</sup>C NMR (100 MHz, CDCl<sub>3</sub>):  $\delta$  160.1, 112.5, 105.3, 83.9, 68.1, 29.6, 29.6, 29.4, 29.4, 26.1, 25.0. The boron-bound carbons were not detected due to quadrupole relaxation.

<sup>11</sup>B NMR (160 MHz, CDCl<sub>3</sub>):  $\delta$  30.4

HRMS (MALDI<sup>+</sup>):  $m/z$  calcd. for C<sub>72</sub>H<sub>117</sub>B<sub>3</sub>O<sub>12</sub>Na: 1229.8747, found: 1229.8778 [M+Na]<sup>+</sup>.

IR (ATR): 2925, 2853, 1715, 1586, 1428, 1360, 1308, 1163, 1146, 1053, 968, 851, 706 cm<sup>-1</sup>.

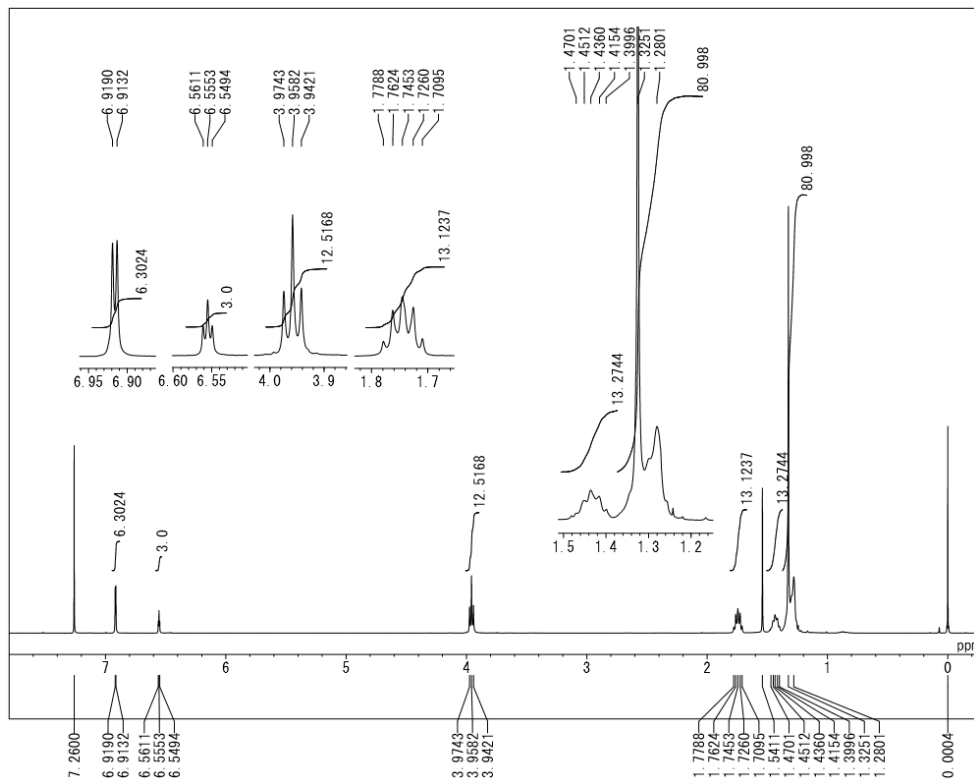

DFILE C:\USERS\ISATOR\IONEDRIVE\  
 修論データスペクトル集\7 BPIN  
 MAC 還元体\7 BPIN\MAC 還元体  
 (SO354).SRM1  
 DATIM 04/Feb/2020 19:03:36  
 COMNT

OBNUC <sup>1</sup>H  
 EXMOD ZG30  
 OBFREQ 400.13 MHz  
 OBSET 0.0 kHz  
 OBFIN 10003.76 Hz  
 POINT 65536  
 FREQU 8196.722 Hz  
 SCANS 16  
 ACQTM 7.9954 s  
 IRNUC OFF  
 PROBHD Z163739\_0101 (PI HR-400  
 S1-BBF/H  
 INSTRUM AVANCE  
 PULSPRG ZG30  
 GRDPRG  
 CTEMP 26.227 °C  
 SLVNT CDCL<sub>3</sub>  
 BF 0.25 Hz

<sup>1</sup>H NMR

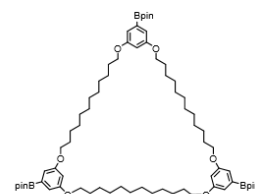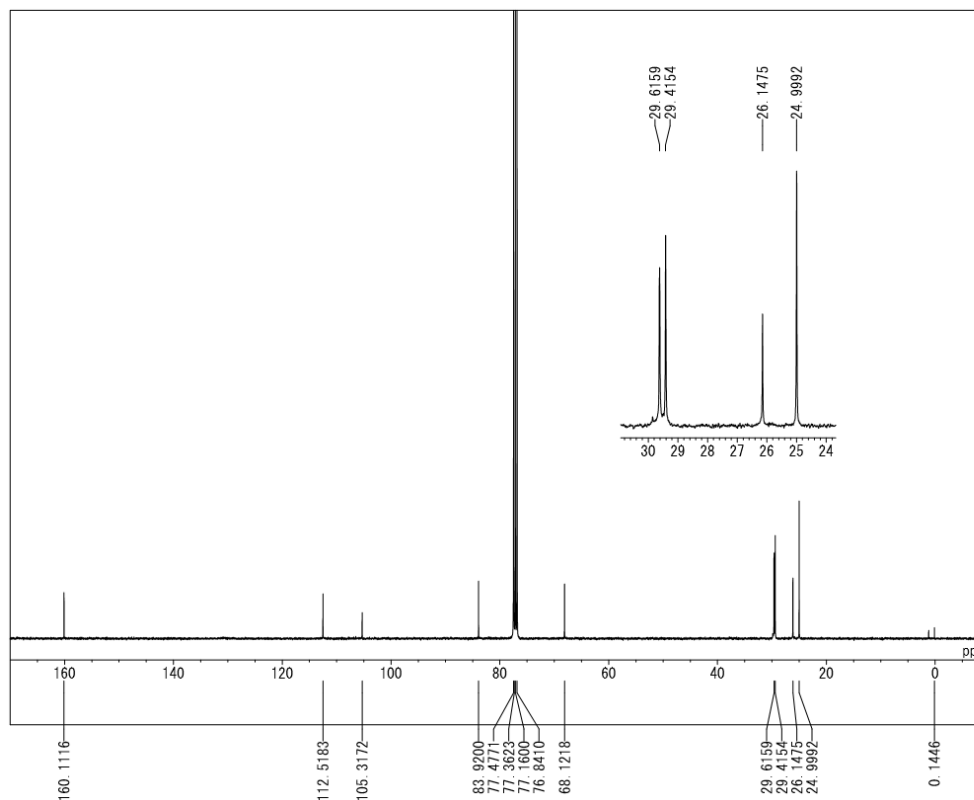

DFILE C:\USERS\ISATOR\IONEDRIVE\  
 修論データスペクトル集\7 BPIN  
 MAC 還元体\7 BPIN\MAC 還元体  
 13C (SO333).SRM1  
 DATIM 24/Jan/2020 08:37:55  
 COMNT

OBNUC <sup>13</sup>C  
 EXMOD ZGPG30  
 OBFREQ 100.63 MHz  
 OBSET 0.0 kHz  
 OBFIN 9999.209 Hz  
 POINT 32768  
 FREQU 24038.46 Hz  
 SCANS 10000  
 ACQTM 1.3631 s  
 IRNUC OFF  
 PROBHD 5 MM PABBO BB-1H/D Z-  
 GRD Z104450  
 INSTRUM SPECT  
 PULSPRG ZGPG30  
 GRDPRG  
 CTEMP 26.85 °C  
 SLVNT CDCL<sub>3</sub>  
 BF 0.25 Hz  
 RGAIN 72

<sup>13</sup>C NMR

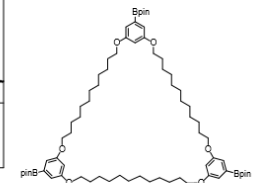

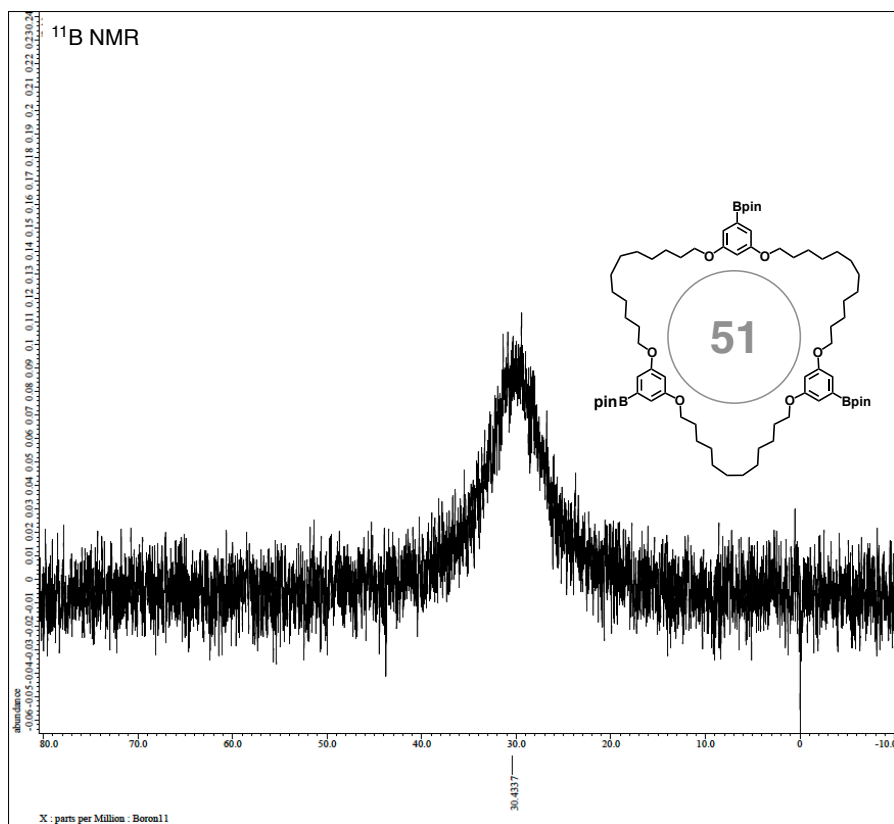

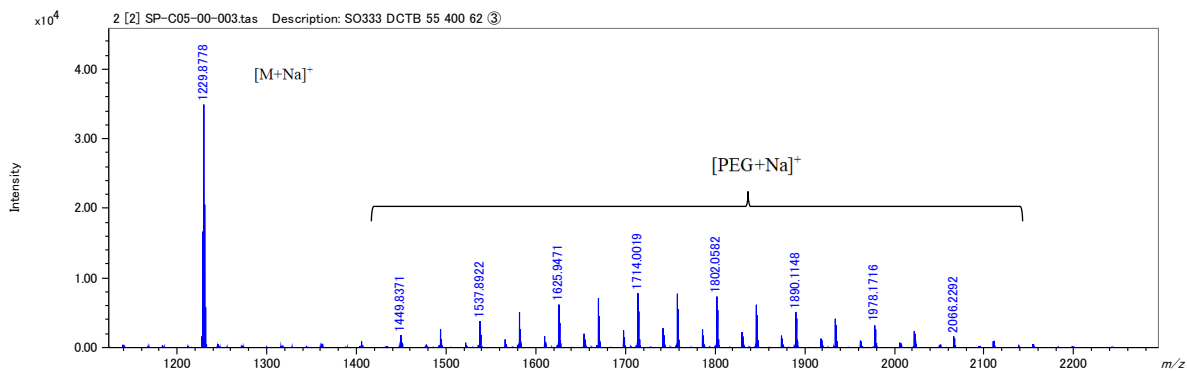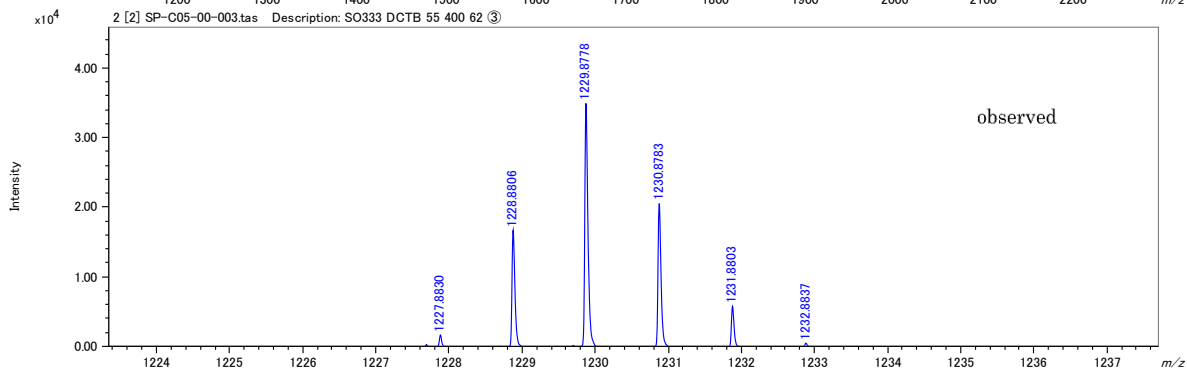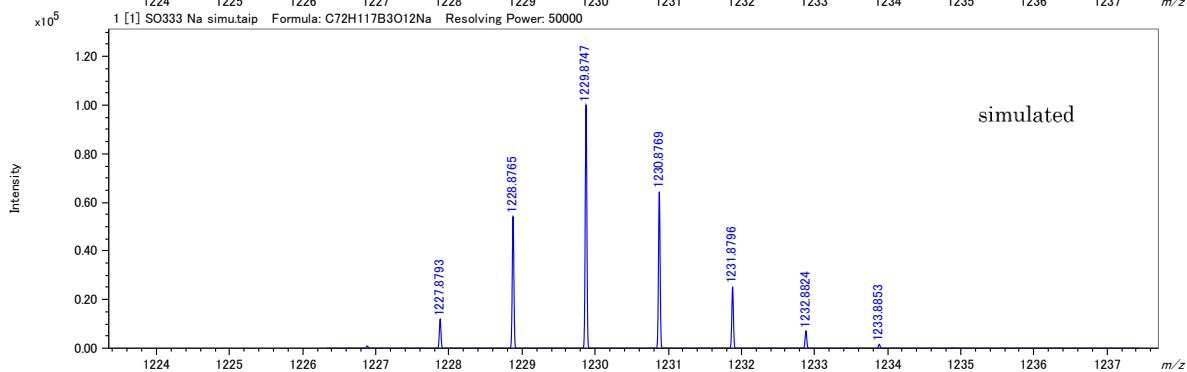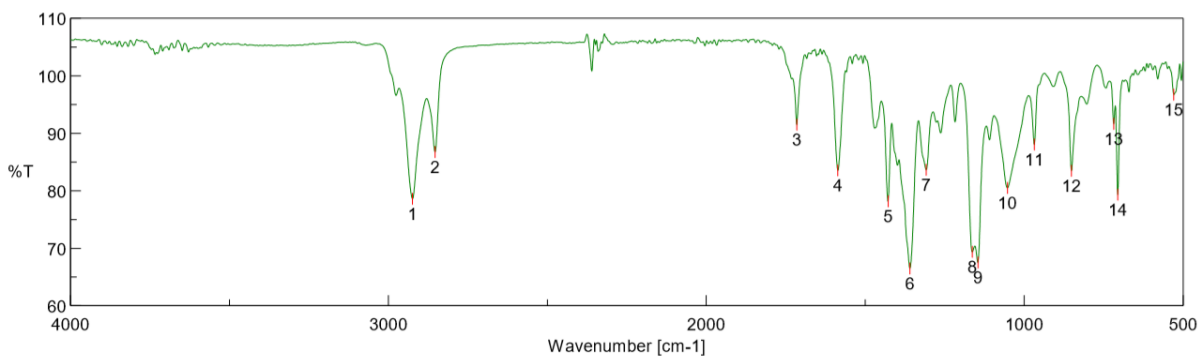

[ピーク検出結果]

| No. | 位置      | 強度      |
|-----|---------|---------|-----|---------|---------|-----|---------|---------|-----|---------|---------|
| 1   | 2924.52 | 78.6038 | 2   | 2853.17 | 86.7387 | 3   | 1715.37 | 91.4753 | 4   | 1586.16 | 83.5199 |
| 5   | 1428.03 | 78.1427 | 6   | 1359.57 | 66.4531 | 7   | 1308.46 | 83.643  | 8   | 1162.87 | 69.3532 |
| 9   | 1145.51 | 67.5313 | 10  | 1052.94 | 80.4953 | 11  | 968.09  | 88.0362 | 12  | 851.418 | 83.4435 |
| 13  | 718.354 | 91.6253 | 14  | 705.819 | 79.3017 | 15  | 529.364 | 96.7214 |     |         |         |

#### 4-4. Suzuki-Miyaura coupling of Macrocycle **6b** and 9-bromoanthracene

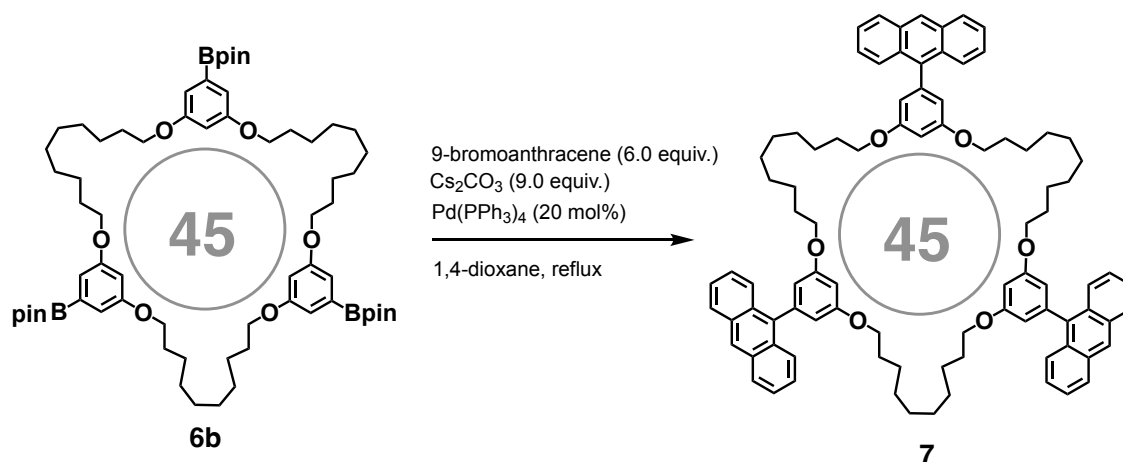

Macrocycle **6b** (11.0 mg, 9.8  $\mu\text{mol}$ ), 9-bromoanthracene (15.1 mg, 58.7  $\mu\text{mol}$ ), Pd(PPh<sub>3</sub>)<sub>4</sub> (2.3 mg, 2.0  $\mu\text{mol}$ ), Cs<sub>2</sub>CO<sub>3</sub> (28.7 mg, 88.1  $\mu\text{mol}$ ) were added to a test tube and the test tube was filled with Ar. Degassed 1,4-dioxane (0.5 mL) were added to the test tube and the resulting mixture was refluxed for 24 h. The reaction mixture was treated with water and the organic material was extracted with CHCl<sub>3</sub>. The organic layer was washed with brine and dried over Na<sub>2</sub>SO<sub>4</sub>. The crude product was purified by silica gel column chromatography (CHCl<sub>3</sub>/*n*-hexane = 3:2) to afford **7** (8.1 mg, 65% yield).

Physical data of **7**

<sup>1</sup>H NMR (400 MHz, CDCl<sub>3</sub>):  $\delta$  8.47 (s, 3H), 8.02 (dd,  $J$  = 8.4 Hz, 6H), 7.77 (dd,  $J$  = 8.8, 0.8 Hz, 6H), 7.44 (ddt,  $J$  = 8.4, 6.6, 1.4 Hz, 6H), 7.35 (ddt,  $J$  = 8.8, 6.6, 1.4 Hz, 6H), 6.64 (t,  $J$  = 2.3 Hz, 3H), 6.57 (d,  $J$  = 2.3 Hz, 6H), 3.98 (t,  $J$  = 6.5 Hz, 12H), 1.78 (quin,  $J$  = 7.1 Hz, 12H), 1.50-1.44 (m, 12H), 1.38-1.30 (m, 24H).

<sup>13</sup>C NMR (100 MHz, CDCl<sub>3</sub>):  $\delta$  160.4, 140.8, 137.3, 131.5, 130.1, 128.4, 127.2, 126.6, 125.4, 125.2, 110.0, 100.9, 68.3, 29.5, 29.4, 29.4, 26.1.

HRMS (MALDI<sup>+</sup>):  $m/z$  calcd. for C<sub>90</sub>H<sub>96</sub>O<sub>6</sub>: 1272.7201, found: 1272.7219 [M]<sup>+</sup>.

IR (ATR): 2925, 2853, 1712, 1589, 1442, 1362, 1220, 1161, 1056, 885, 833, 758, 738, 701 cm<sup>-1</sup>.





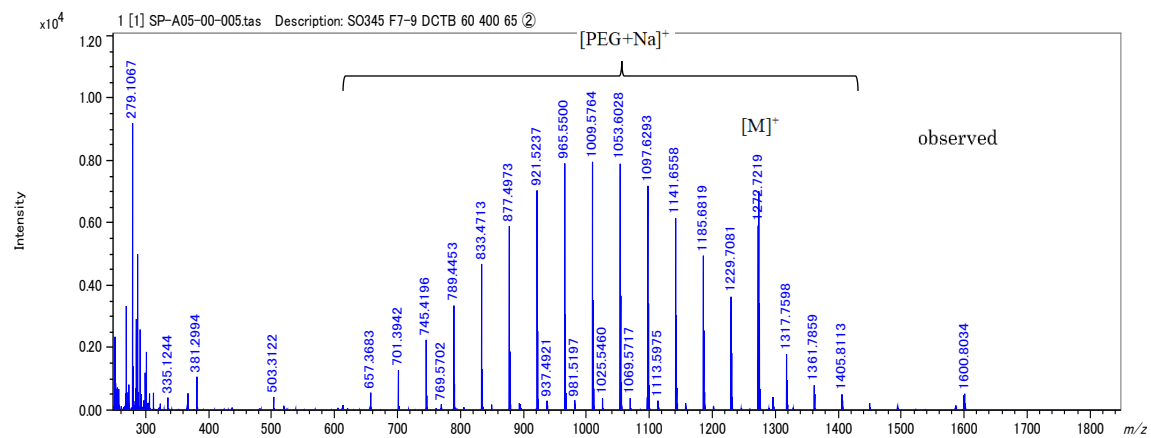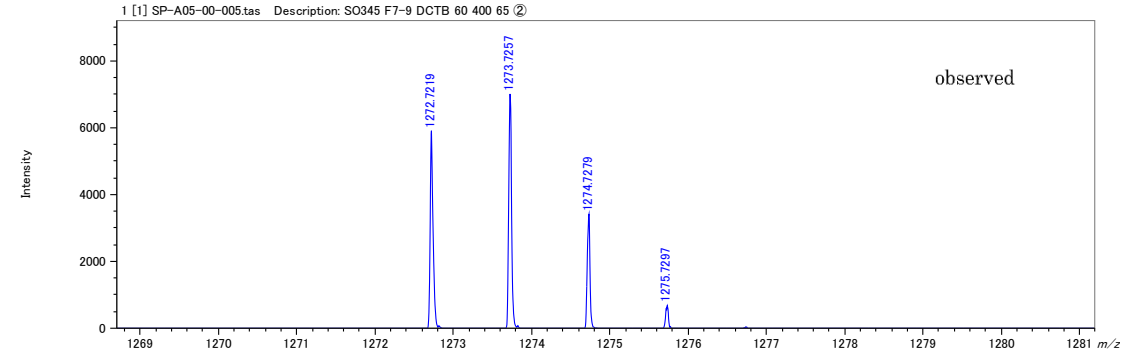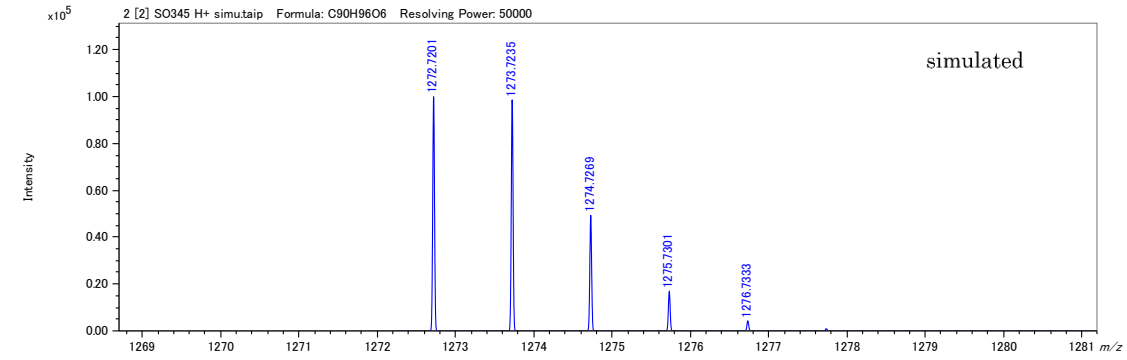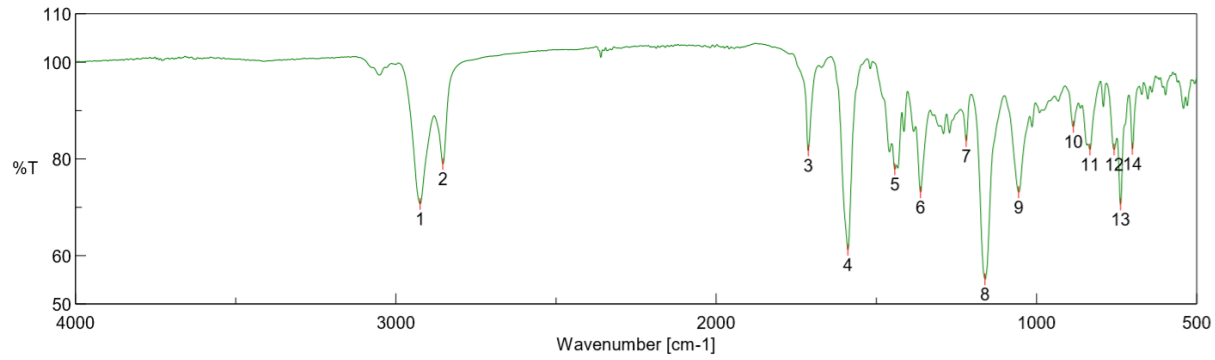

[ピーク検出結果]

| No. | 位置      | 強度      |
|-----|---------|---------|-----|---------|---------|-----|---------|---------|-----|---------|---------|
| 1   | 2924.52 | 70.6847 | 2   | 2853.17 | 78.9375 | 3   | 1712.48 | 81.7224 | 4   | 1589.06 | 61.2174 |
| 5   | 1442.49 | 77.8298 | 6   | 1362.46 | 73.0868 | 7   | 1219.76 | 83.6846 | 8   | 1160.94 | 55.1092 |
| 9   | 1055.84 | 73.0851 | 10  | 885.166 | 86.6278 | 11  | 833.098 | 81.941  | 12  | 757.888 | 81.9401 |
| 13  | 737.639 | 70.5535 | 14  | 700.998 | 82.0879 |     |         |         |     |         |         |

#### 4-5. Oxidation of Macrocycle **6b** to **8**

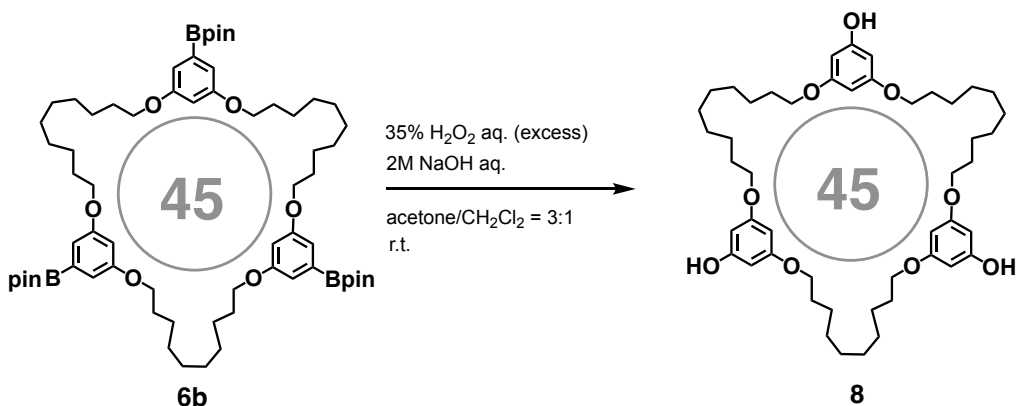

Macrocycle **6b** (17.9 mg, 15.9  $\mu$ mol) was dissolved in a mixture of acetone (8.6 mL) and CH<sub>2</sub>Cl<sub>2</sub> (2.9 mL). 2 M NaOH aq. (90 equiv.) and 35% H<sub>2</sub>O<sub>2</sub> aq. (excess) was added and stirred at room temperature. After 22 h, the reaction mixture was quenched by 1 N HCl aq. and the organic solvents were evaporated. The residue was treated with water and the organic materials was extracted with CHCl<sub>3</sub>. The organic layer was washed with brine and dried over MgSO<sub>4</sub>. The crude product was washed with hexane to afford **8** (10.1 mg, 80% yield).

Physical data of **8**

<sup>1</sup>H NMR (400 MHz, CDCl<sub>3</sub>):  $\delta$  6.07 (t,  $J$  = 2.1 Hz, 3H), 5.99 (d,  $J$  = 2.1 Hz, 6H), 4.77 (s, 3H), 3.90 (t,  $J$  = 6.5 Hz, 12H), 1.74 (quin,  $J$  = 6.9 Hz, 12H), 1.45-1.41 (m, 12H), 1.38-1.30 (m, 24H).

<sup>13</sup>C NMR (100 MHz, CDCl<sub>3</sub>):  $\delta$  161.3, 157.4, 94.8, 94.4, 68.1, 29.3, 29.2, 26.0.

HRMS (MALDI<sup>+</sup>):  $m/z$  calcd. for C<sub>48</sub>H<sub>72</sub>O<sub>9</sub>Na: 815.5069, found: 815.5080 [M+Na]<sup>+</sup>.

IR (ATR): 3348, 2922, 2851, 1594, 1497, 1463, 1387, 1145, 1092, 821, 593 cm<sup>-1</sup>.

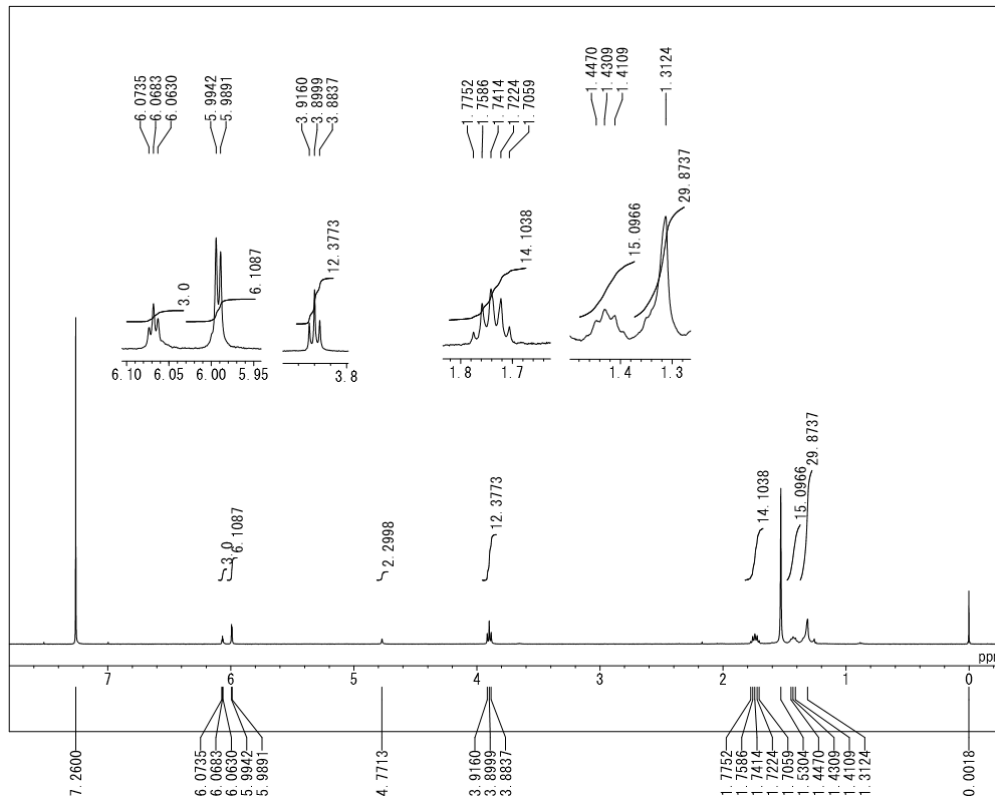

D:\FILE C:\USERS\SATOR\IONEDRIVE\  
 検証データ\spectrol集\IC6 OHM  
 ACIC6 OH MAC 1H (SO334).SRM1  
 DATIM 13/Dec/2019 16:01:56  
 COMNT

OBNUC <sup>1</sup>H  
 EXMOD ZG30  
 OBFREQ 400.13 MHz  
 OBSET 0.0 kHz  
 OBFIN 10003.76 Hz  
 POINT 65536  
 FREQU 8196.722 Hz  
 SCANS 16  
 ACQTM 7.9954 s  
 IRNUC OFF  
 PROBHD Z163739\_0101 (PI HR-400  
 -S1-BBFH  
 INSTRUM AVANCE  
 PULSPRG ZG30  
 GRDPRG  
 CTEMP 29.9775 °C  
 SLVNT CDCl<sub>3</sub>  
 BF 0.25 Hz  
 RGAIN 101

<sup>1</sup>H NMR

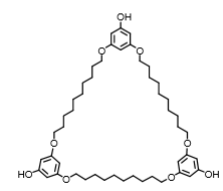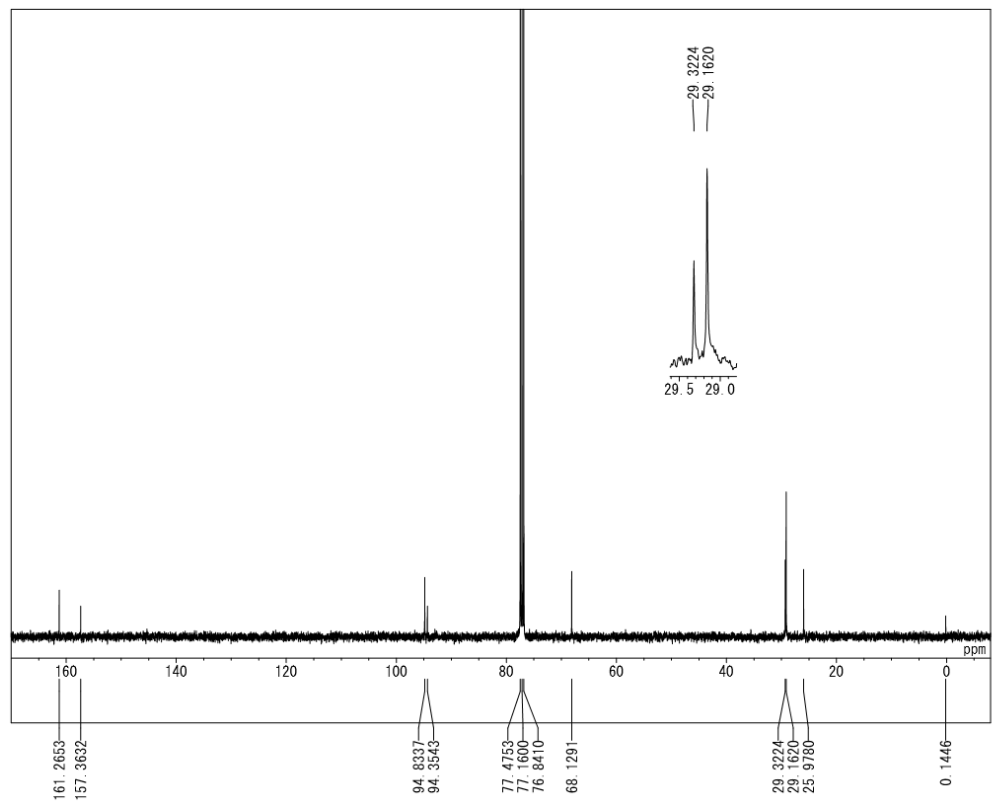

D:\FILE C:\USERS\SATOR\IONEDRIVE\  
 検証データ\spectrol集\IC6 OHM  
 ACIC6 OH MAC 13C (SO334).SRM  
 1  
 DATIM 19/Jan/2020 17:51:58  
 COMNT

OBNUC <sup>13</sup>C  
 EXMOD ZGPG30  
 OBFREQ 100.63 MHz  
 OBSET 0.0 kHz  
 OBFIN 9999.217 Hz  
 POINT 32768  
 FREQU 24038.46 Hz  
 SCANS 1024  
 ACQTM 1.3631 s  
 IRNUC OFF  
 PROBHD 5 MM PABBO BB-1H/D Z-  
 GRD Z104450  
 INSTRUM SPECT  
 PULSPRG ZGPG30  
 GRDPRG  
 CTEMP 26.85 °C  
 SLVNT CDCl<sub>3</sub>  
 BF 0.25 Hz  
 RGAIN 72

<sup>13</sup>C NMR

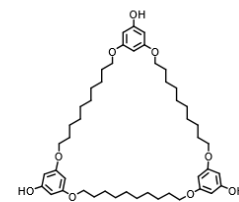

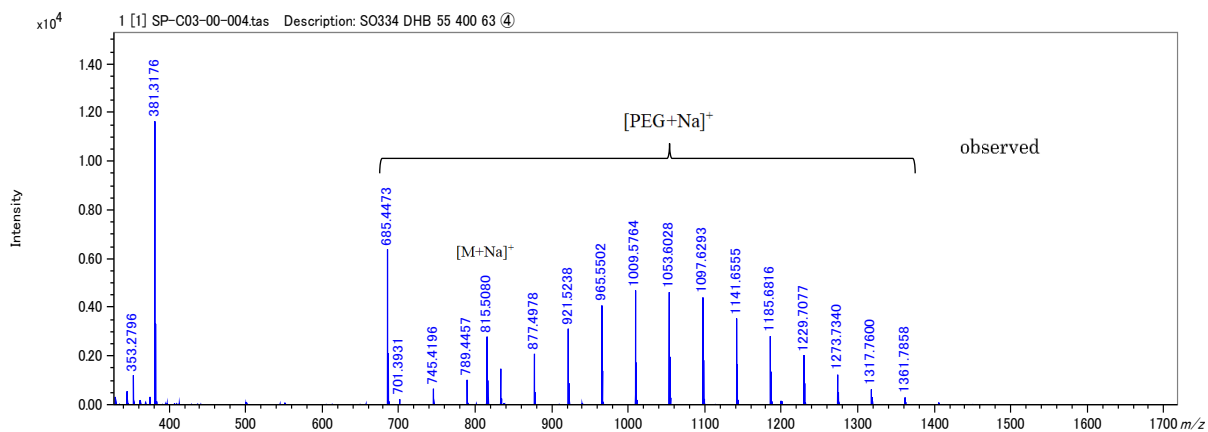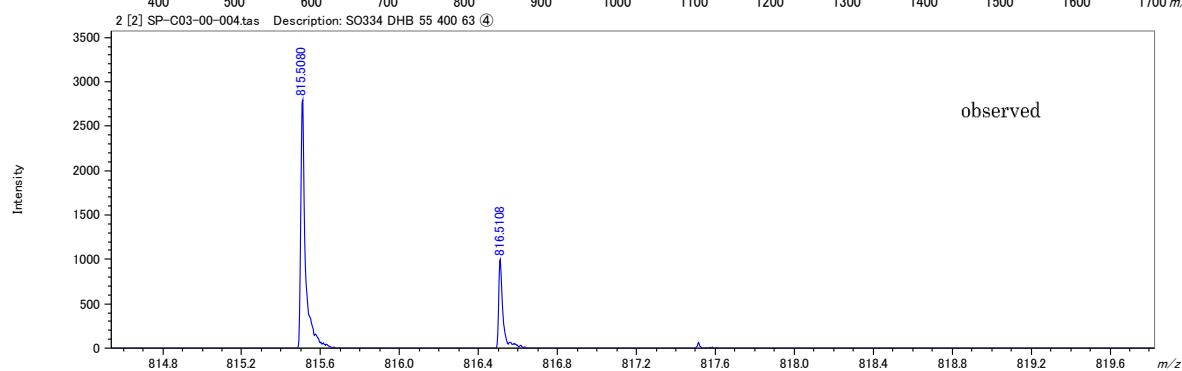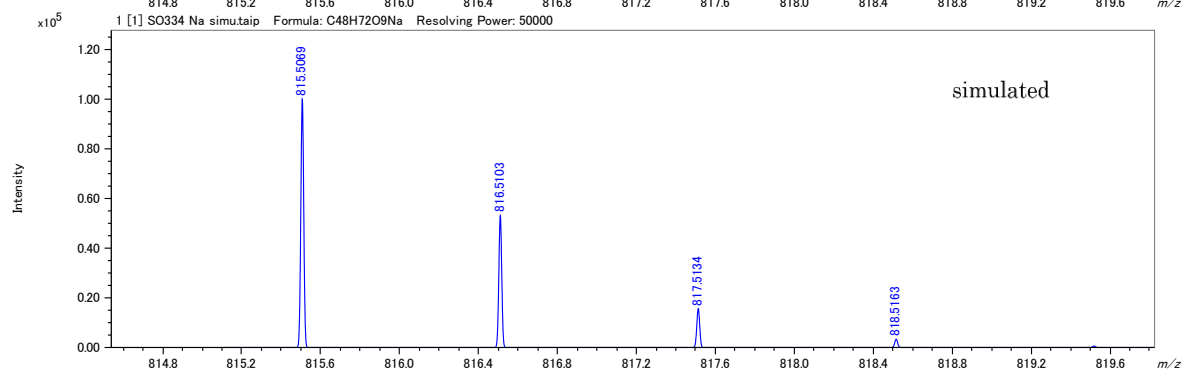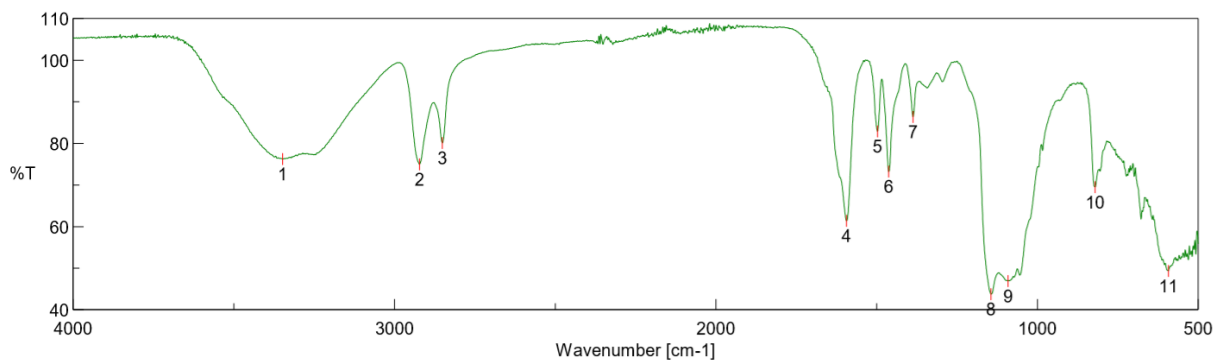

[ピーク検出結果]

| No. | 位置      | 強度      |
|-----|---------|---------|-----|---------|---------|-----|---------|---------|-----|---------|---------|
| 1   | 3347.82 | 76.2095 | 2   | 2922.11 | 74.9486 | 3   | 2851.24 | 80.0639 | 4   | 1593.88 | 61.3322 |
| 5   | 1497.45 | 82.8395 | 6   | 1462.74 | 73.1704 | 7   | 1387.05 | 86.3188 | 8   | 1144.55 | 43.7068 |
| 9   | 1091.51 | 46.8521 | 10  | 820.563 | 69.4463 | 11  | 592.521 | 49.2967 |     |         |         |

## 5. Synthetic Procedures and Characterization of New Compounds

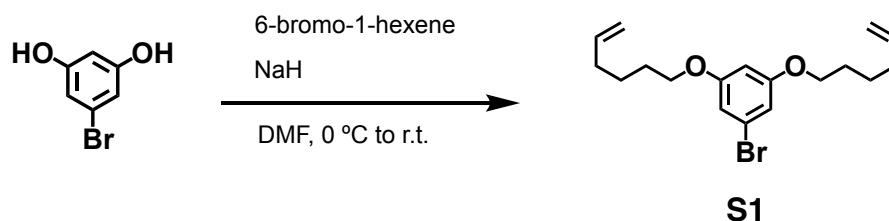

Under an Ar atmosphere, NaH (60% in oil; 320 mg, 8.0 mmol) was dissolved in dry DMF (13.3 mL) and then 5-bromoresorcinol (756 mg, 4.0 mmol) was added at 0 °C. The mixture was stirred at 0 °C for 1 h, and then 6-bromo-1-hexene (1.6 mL, 12.0 mmol) was added slowly and further stirred at room temperature. After 12 h, water was added and the product was extracted with *n*-hexane/EtOAc = 4:1 and then combined extract was washed with brine and dried over MgSO<sub>4</sub>. After solvent was evaporated, the residue was purified by column chromatography (*n*-hexane/EtOAc = 9:1) to give **S1** (1.41 g, quant.).

Physical data of **S1**

<sup>1</sup>H NMR (400 MHz, CDCl<sub>3</sub>): δ 6.64 (d, *J* = 2.2 Hz, 2H), 6.36 (t, *J* = 2.2 Hz, 1H), 5.82 (ddt, *J* = 17.1, 10.2, 6.7 Hz, 2H), 5.06-5.01 (m, 2H), 4.99-4.96 (m, 2H), 3.91 (t, *J* = 6.44 Hz, 4H), 2.15-2.09 (m, 4H), 1.78 (quin, *J* = 7.0 Hz, 4H), 1.59-1.51 (m, 4H).

<sup>13</sup>C NMR (100 MHz, CDCl<sub>3</sub>): δ 160.8, 138.6, 123.0, 115.0, 110.4, 100.8, 68.2, 33.5, 28.7, 25.4.

HRMS (MALDI<sup>+</sup>): *m/z* calcd. for C<sub>18</sub>H<sub>25</sub>BrO<sub>2</sub>Na: 375.0930, found: 375.0929 [M+Na]<sup>+</sup>.

IR (ATR): 3077, 2924, 2871, 1597, 1575, 1451, 1439, 1386, 1278, 1053, 990, 911, 833, 677 cm<sup>-1</sup>.

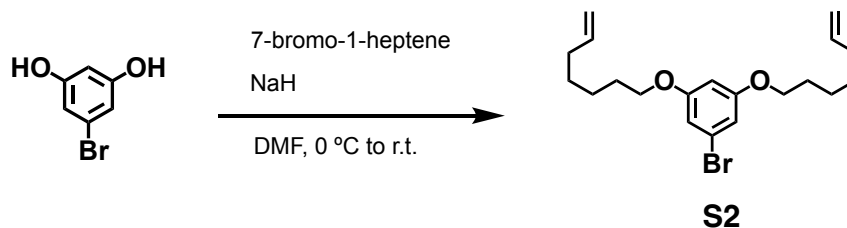

Under an Ar atmosphere, NaH (60% in oil; 240 mg, 6.0 mmol) was dissolved in dry DMF (10.0 mL) and then 5-bromoresorcinol (567 mg, 3.0 mmol) was added at 0 °C. The mixture was stirred at 0 °C for 1 h, and then 7-bromo-1-heptene (1.37 mL, 9.0 mmol) was added slowly and further stirred at room temperature. After 22 h, water was added and the product was extracted with hexane/EtOAc = 4:1 and then combined extract was washed by brine and dried over MgSO<sub>4</sub>. The solvent was evaporated to give **S2** (1.14 g, quant.).

Physical data of **S2**

<sup>1</sup>H NMR (400 MHz, CDCl<sub>3</sub>): δ 6.63 (d, *J* = 2.2 Hz, 2H), 6.36 (t, *J* = 2.2 Hz, 1H), 5.82 (ddt, *J* = 17.1, 10.3,

6.8 Hz, 2H), 5.03-4.98 (m, 2H), 4.97-4.94 (m, 2H), 3.90 (t,  $J = 6.5$  Hz, 4H), 2.10-2.06 (m, 4H), 1.76 (quin,  $J = 6.9$  Hz, 4H), 1.47-1.43 (m, 8H).

$^{13}\text{C}$  NMR (100 MHz,  $\text{CDCl}_3$ ):  $\delta$  160.9, 138.9, 123.0, 114.6, 110.4, 100.8, 68.3, 33.8, 29.1, 28.7, 25.6.

HRMS (MALDI<sup>+</sup>):  $m/z$  calcd. for  $\text{C}_{20}\text{H}_{29}\text{BrO}_2\text{Na}$ : 403.1243, found: 403.1258  $[\text{M}+\text{Na}]^+$ .

IR (ATR): 3075, 2926, 2857, 1597, 1575, 1438, 1387, 1278, 1165, 1052, 991, 911, 831, 676  $\text{cm}^{-1}$ .

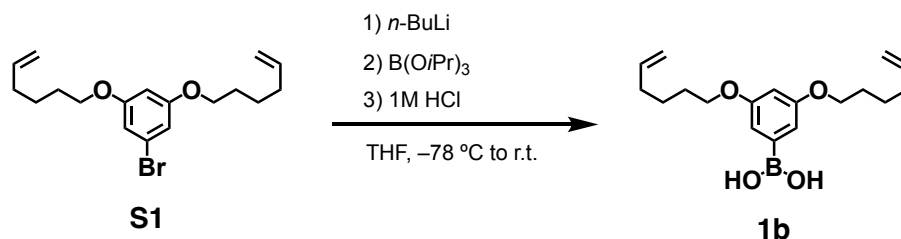

Under an Ar atmosphere, **S1** (700 mg, 19.8 mmol) was dissolved in dry THF (6.6 mL) and then *n*-BuLi (1.57 M in hexane, 1.39 mL, 2.18 mmol) was added dropwise to the solution at  $-78$  °C. The mixture was stirred at  $-78$  °C for 1 h, and then B(O*i*Pr)<sub>3</sub> (500  $\mu\text{L}$ , 2.18 mmol) was added and warmed up to room temperature over 2 h. After warmed up, 1N HCl aq. was added and the product was extracted with *tert*-butyl methyl ether and then combined extract was washed with brine and dried over  $\text{MgSO}_4$ . The solvent was evaporated and the solid was washed with  $\text{CH}_3\text{CN}$  to give **1b** (397 mg, 63%).

Physical data of **1b**

$^1\text{H}$  NMR (400 MHz,  $\text{DMSO}-d_6$ ):  $\delta$  7.99 (s, 2H), 6.92 (d,  $J = 2.2$  Hz, 2H), 6.48 (t,  $J = 2.2$  Hz, 1H), 5.82 (ddt,  $J = 17.1, 10.3, 6.7$  Hz, 2H), 5.06-5.01 (m, 2H), 4.98-4.96 (m, 2H), 3.93 (t,  $J = 6.5$  Hz, 4H), 2.11-2.05 (m, 4H), 1.70 (quin,  $J = 6.9$  Hz, 4H), 1.53-1.46 (m, 4H).

$^{13}\text{C}$  NMR (100 MHz,  $\text{DMSO}-d_6$ ):  $\delta$  159.2, 138.6, 114.9, 112.0, 103.1, 67.1, 32.8, 28.2, 24.8. The boron-bound carbons were not detected due to quadrupole relaxation.

$^{11}\text{B}$  NMR (160 MHz,  $\text{DMSO}-d_6$ ):  $\delta$  28.5

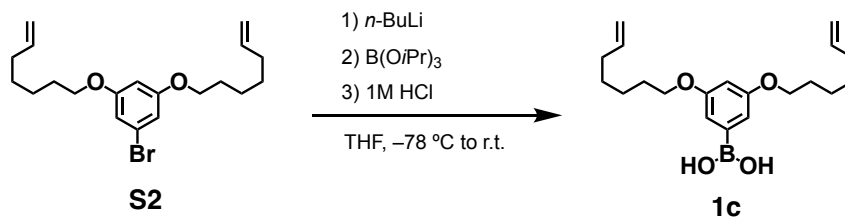

Under an Ar atmosphere, **S2** (1.07 g, 2.8 mmol) was dissolved in dry THF (9.3 mL) and then *n*-BuLi (1.57 M in hexane, 1.96 mL, 3.08 mmol) was added dropwise to the solution at  $-78$  °C. The mixture was stirred at  $-78$  °C for 1 h, and then B(O*i*Pr)<sub>3</sub> (775  $\mu\text{L}$ , 3.36 mmol) was added and warmed up to room temperature

over 2 h. After warmed up, 1N HCl aq. was added and the product was extracted with *tert*-butyl methyl ether and then combined extract was washed by brine and dried over MgSO<sub>4</sub>. After solvent was evaporated, the residue was purified by column chromatography (*n*-hexane/EtOAc = 9:1, then EtOAc only) to give **1c** (405 mg, 40%).

#### Physical data of **1c**

<sup>1</sup>H NMR (400 MHz, DMSO-*d*<sub>6</sub>): δ 7.99 (s, 2H), 6.91 (d, *J* = 2.3 Hz, 2H), 6.47 (t, *J* = 2.3 Hz, 1H), 5.81 (ddt, *J* = 17.1, 10.2, 6.7 Hz, 2H), 5.04-4.99 (m, 2H), 4.97-4.93 (m, 2H), 3.92 (t, *J* = 6.6 Hz, 4H), 2.07-2.02 (m, 4H), 1.73-1.66 (m, 4H), 1.43-1.39 (m, 8H).

<sup>13</sup>C NMR (100 MHz, DMSO-*d*<sub>6</sub>): δ 159.3, 138.7, 114.8, 112.0, 103.1, 67.2, 33.2, 28.6, 28.0, 25.1. The boron-bound carbons were not detected due to quadrupole relaxation.

<sup>11</sup>B NMR (160 MHz, DMSO-*d*<sub>6</sub>): δ 28.3

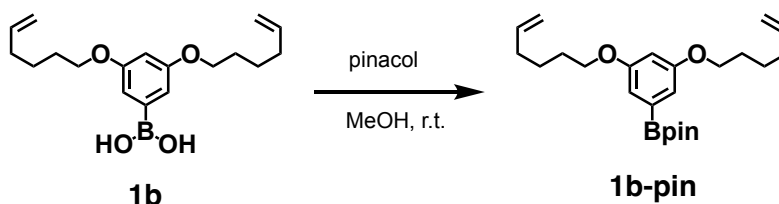

Boronic acid **1b** (5.5 mg, 17 μmol) was treated with pinacol (6.0 mg, 51 μmol) in methanol. After the mixture was evaporated, the residue was purified by GPC to give **1b-pin** (4.29 mg, 71%).

#### Physical data of **1b-pin**

<sup>1</sup>H NMR (400 MHz, CDCl<sub>3</sub>): δ 6.92 (d, *J* = 2.4 Hz, 2H), 6.55 (t, *J* = 2.3 Hz, 1H), 5.83 (ddt, *J* = 17.0, 10.3, 6.7 Hz, 2H), 5.05-5.00 (m, 2H), 4.98-4.95 (m, 2H), 3.97 (t, *J* = 6.4 Hz, 4H), 2.15-2.09 (m, 4H), 1.78 (quin, *J* = 7.0 Hz, 4H), 1.57-1.52 (m, 4H), 1.33 (s, 12H).

<sup>13</sup>C NMR (100 MHz, CDCl<sub>3</sub>): δ 160.1, 138.8, 114.8, 112.5, 105.3, 84.0, 67.9, 33.6, 28.9, 25.5, 25.0. The boron-bound carbons were not detected due to quadrupole relaxation.

<sup>11</sup>B NMR (160 MHz, CDCl<sub>3</sub>): δ 32.2

HRMS (MALDI<sup>+</sup>): *m/z* calcd. for C<sub>24</sub>H<sub>37</sub>BO<sub>4</sub>Na: 423.2681, found: 423.2678 [M+Na]<sup>+</sup>.

IR (ATR): 3075, 2977, 2934, 2868, 1641, 1586, 1429, 1356, 1308, 1164, 1138, 1052, 910, 851, 706 cm<sup>-1</sup>.



# 7. <sup>1</sup>H NMR, <sup>13</sup>C NMR and <sup>11</sup>B NMR spectra

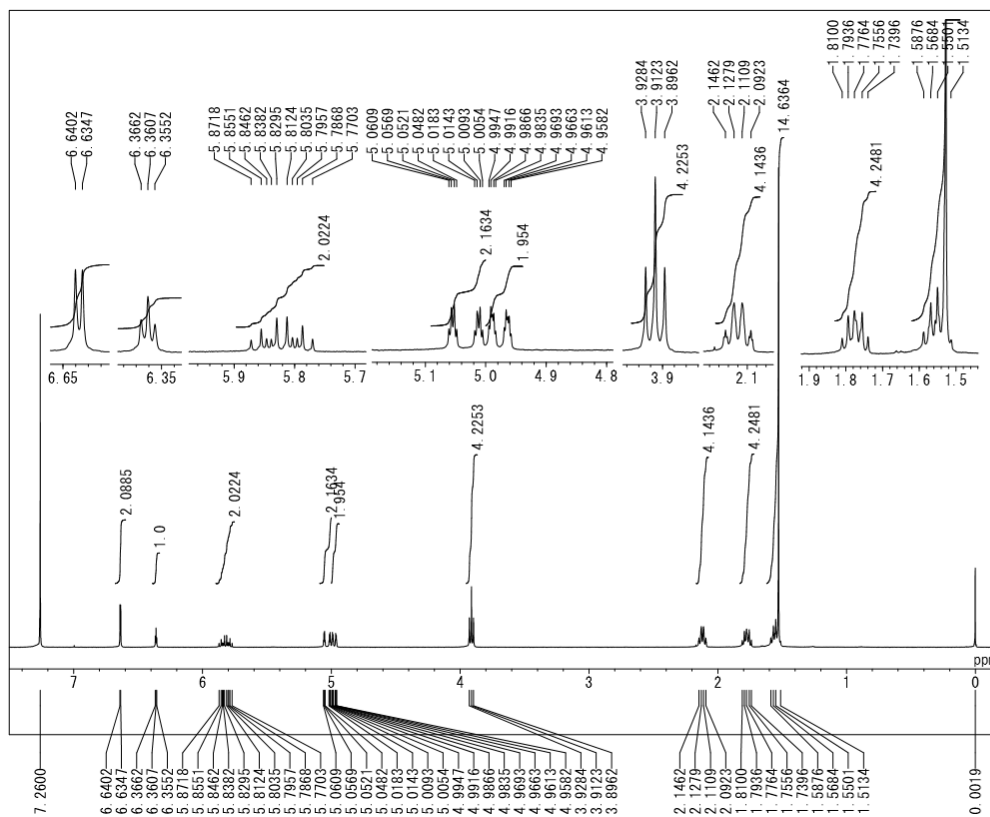

DFILE C:\Users\sator\OneDrive\修論データ\スペクトル集\C6 Br体\C6 Br体 1H NMR (SO332).RM1  
 DATIM 07/Dec/2019 13:46:31  
 COMNT

OBNUC <sup>1</sup>H  
 EXMOD ZG30  
 OBFREQ 400.13 MHz  
 OBSET 0.0 kHz  
 OBFIN 10003.76 Hz  
 POINT 65536  
 FREQ 8196.722 Hz  
 SCANS 16  
 ACQTM 7.9954 s  
 IRNUC OFF  
 PROBHD Z163739\_0101 (PI HR-400  
 -S1-BBF/H  
 INSTRUM AVANCE  
 PULSPRG ZG30  
 GRDPRG  
 CTEMP 29.9922 °C  
 SLVNT CDCL<sub>3</sub>  
 BF 0.25 Hz  
 RGAIN 101

<sup>1</sup>H NMR

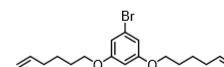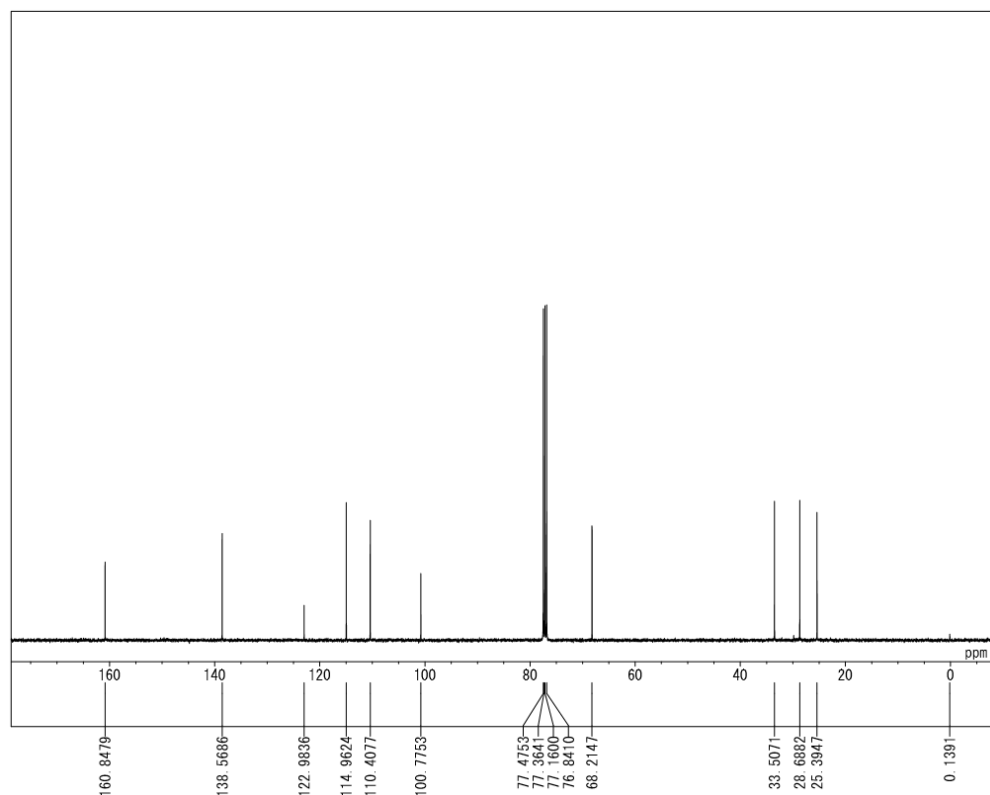

DFILE C:\USERS\SATOR\IONEDRIVE\修論データ\スペクトル集\C6 Br体\C6 Br体 13C (SO244).RM1  
 DATIM 19/Sep/2019 01:51:05  
 COMNT

OBNUC <sup>13</sup>C  
 EXMOD ZPG30  
 OBFREQ 100.63 MHz  
 OBSET 0.0 kHz  
 OBFIN 9999.216 Hz  
 POINT 32768  
 FREQ 24038.46 Hz  
 SCANS 1024  
 ACQTM 1.3631 s  
 IRNUC OFF  
 PROBHD 5 MM PABBO BB-1H/D Z-GRD Z104450  
 INSTRUM SPECT  
 PULSPRG ZPG30  
 GRDPRG  
 CTEMP 26.01 °C  
 SLVNT CDCL<sub>3</sub>  
 BF 0.25 Hz  
 RGAIN 114

<sup>13</sup>C NMR

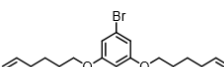

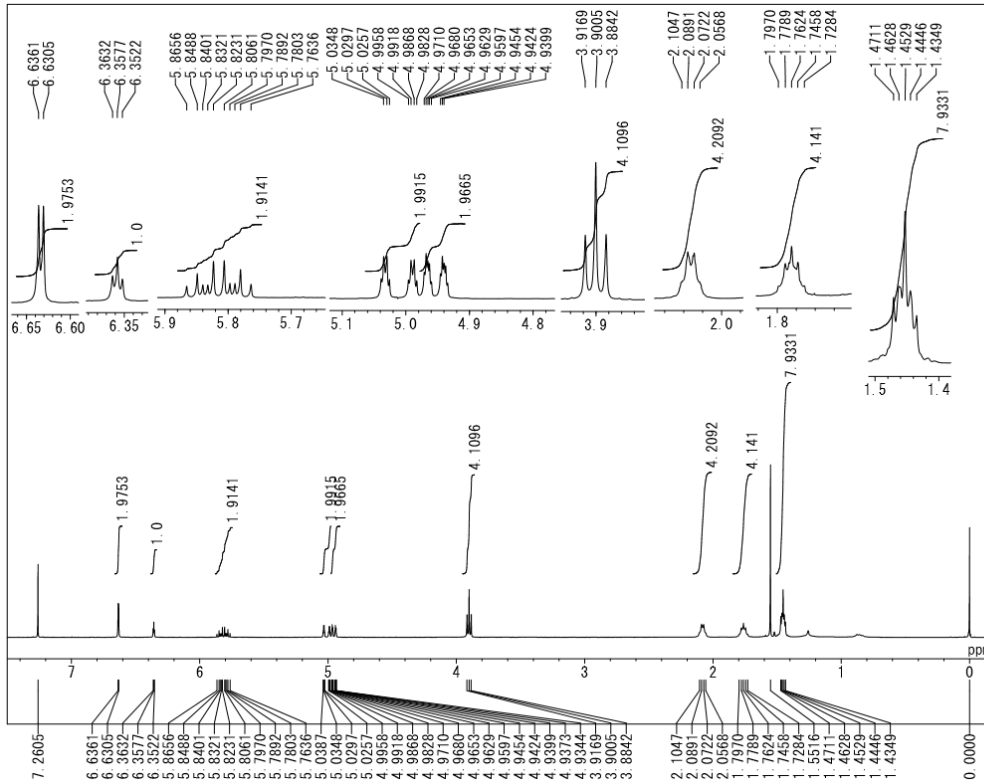

DFILE C:\Users\isator\OneDrive\修論データ\spectra\1H(C7 Br)体\C7 Br 体 1H (SO270).RM1  
 DATIM 03/Sep/2019 10:29:13  
 COMNT  
 OBNUC <sup>1</sup>H  
 EXMOD proton.jpg  
 OBFRQ 398.78 MHz  
 OBSET 2.0 kHz  
 OBFIN 199.2106 Hz  
 POINT 131072(ZeroFill:8)  
 FREQU 7476.077 Hz  
 SCANS 8  
 ACQTM 2.1915 s  
 IRNUC <sup>1</sup>H  
 PROBHD JNM-EZ400S/L1  
 INSTRUM  
 PULSPRG  
 GRDPRG  
 CTEMP 24.1 °C  
 SLVNT CHLOROFORM-D  
 BF 0.25 Hz  
 RGAIN 56

<sup>1</sup>H NMR

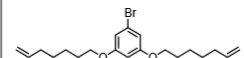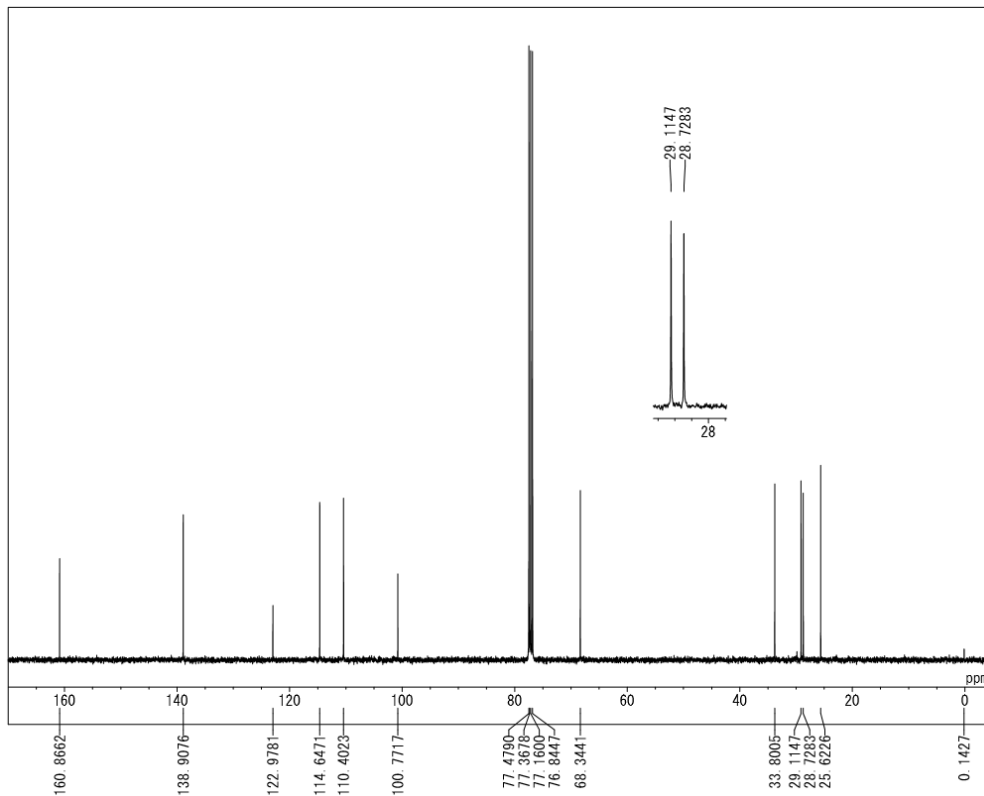

DFILE C:\Users\ISATOR\ONEDRIVE\修論データ\spectra\13C(C7 BR)体\C7 BR 体 13C (SO270).SRM1  
 ORGFILE D:\ユーザー\NMR\修論前\ISO270 C7BR 体 13C\pdata\1111  
 DATIM 21/Sep/2019 05:37:41  
 COMNT  
 OBNUC <sup>13</sup>C  
 OFR 100.63 MHz  
 OBSET 0.0 kHz  
 OBFIN 9999.216 Hz  
 PW1 7.1 μs  
 PW2 7.1 μs  
 PW3 14.2 μs  
 PI1 2.0 ms  
 PI2 0.0035 ms  
 PI3 0.0 ms  
 LOOP1 0  
 POINT 32768  
 SCANS 1024  
 DUMMY 4  
 FREQU 24038.46 Hz  
 ACQTM 1.3631 s  
 PD 2.0 s  
 RGAIN 64

<sup>13</sup>C NMR

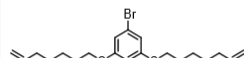

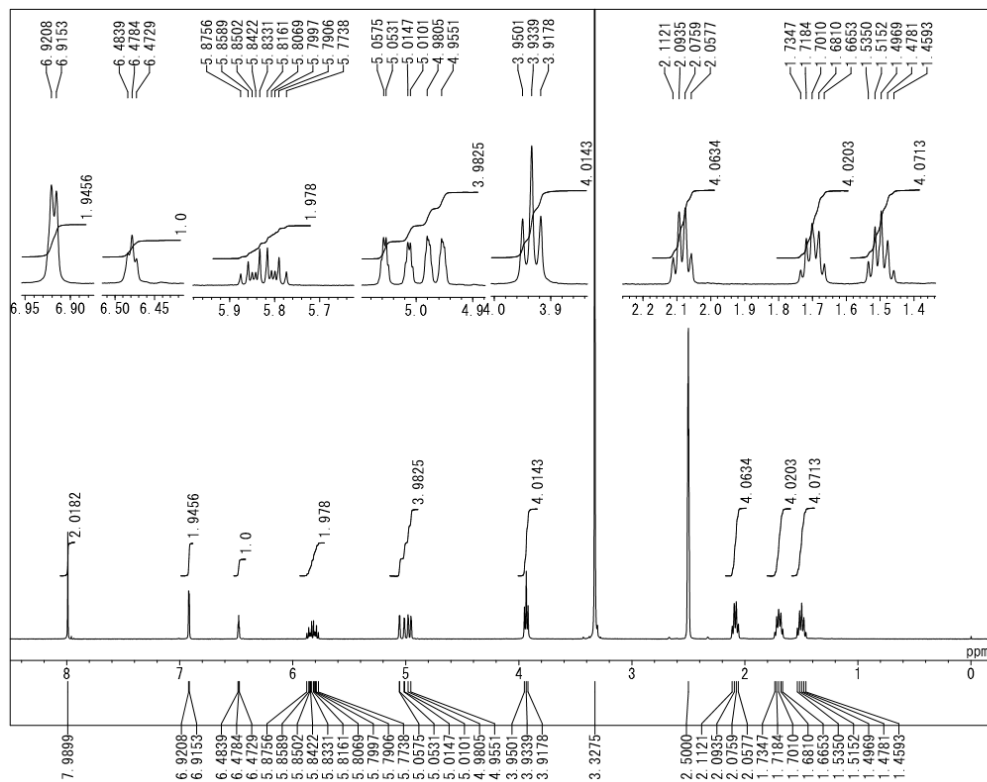

DFILE C:\Users\ator\OneDrive\修論データ\データセット\1,4-ビス(4-オキペンチル)ベンゼン-2,5-ジオール DMSO (SO287).RM1  
6 B(OH)2 DMSO (SO287).RM1  
DATIM 29/Sep/2019 12:54:58  
COMNT

OBNUC <sup>1</sup>H  
EXMOD ZG30  
OBFREQ 400.18 MHz  
OBSET 0.0 kHz  
OBFIN 10016.44 Hz  
POINT 32768  
FREQU 8223.685 Hz  
SCANS 16  
ACQTM 3.9846 s  
IRNUC OFF  
PROBHD 5 MM PABBO BB-1H/D Z-GRD Z104450  
INSTRUM SPECT  
PULSPRG ZG30  
GRDPRG  
CTEMP 24.61 °C  
SLVNT DMSO  
BF 0.25 Hz  
RGAIN 228

**<sup>1</sup>H NMR**

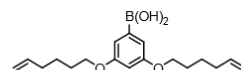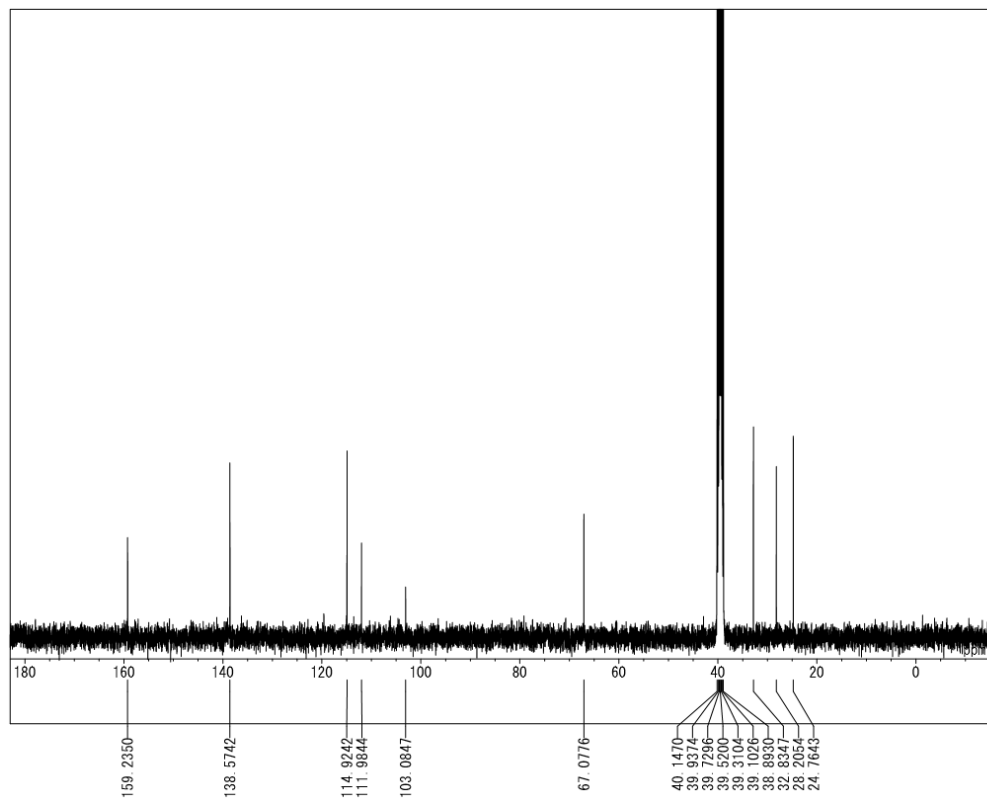

DFILE C:\Users\ator\OneDrive\修論データ\データセット\1,4-ビス(4-オキペンチル)ベンゼン-2,5-ジオール DMSO 13C (SO287).SRM1  
7:SRM1  
DATIM 29/Sep/2019 21:59:47  
COMNT

OBNUC <sup>13</sup>C  
EXMOD ZGPG30  
OBFREQ 100.63 MHz  
OBSET 0.0 kHz  
OBFIN 9999.211 Hz  
POINT 32768  
FREQU 24038.46 Hz  
SCANS 2048  
ACQTM 1.3631 s  
IRNUC OFF  
PROBHD 5 MM PABBO BB-1H/D Z-GRD Z104450  
INSTRUM SPECT  
PULSPRG ZGPG30  
GRDPRG  
CTEMP 25.81 °C  
SLVNT DMSO  
BF 0.25 Hz  
RGAIN 81

**<sup>13</sup>C NMR**

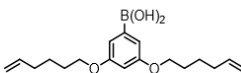

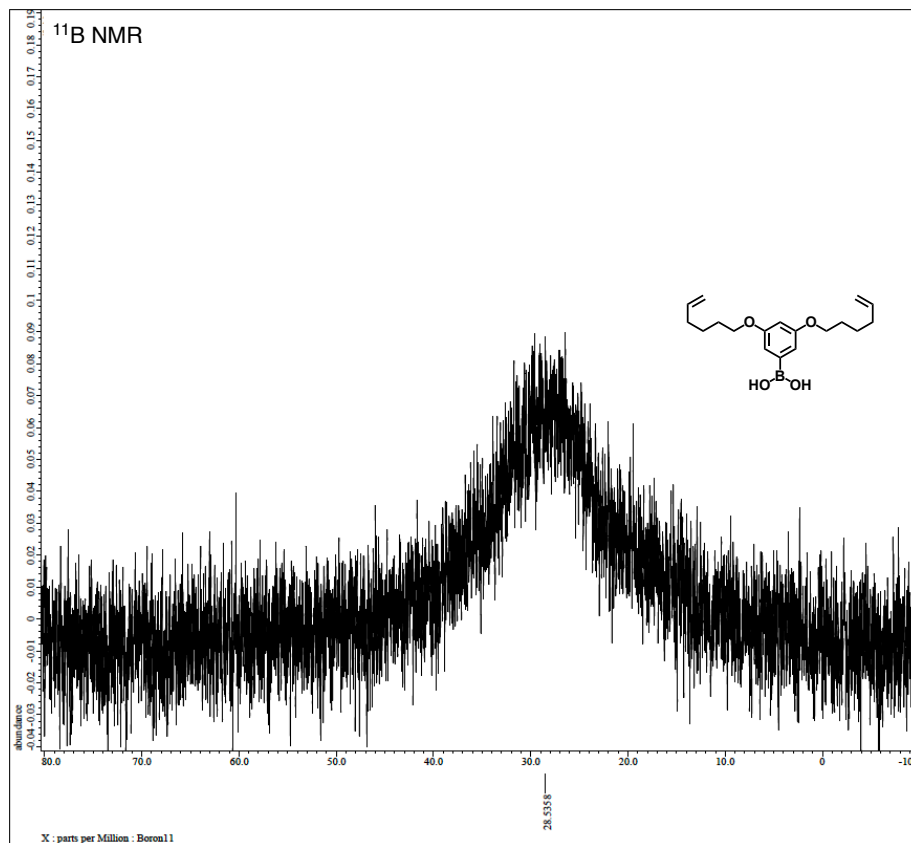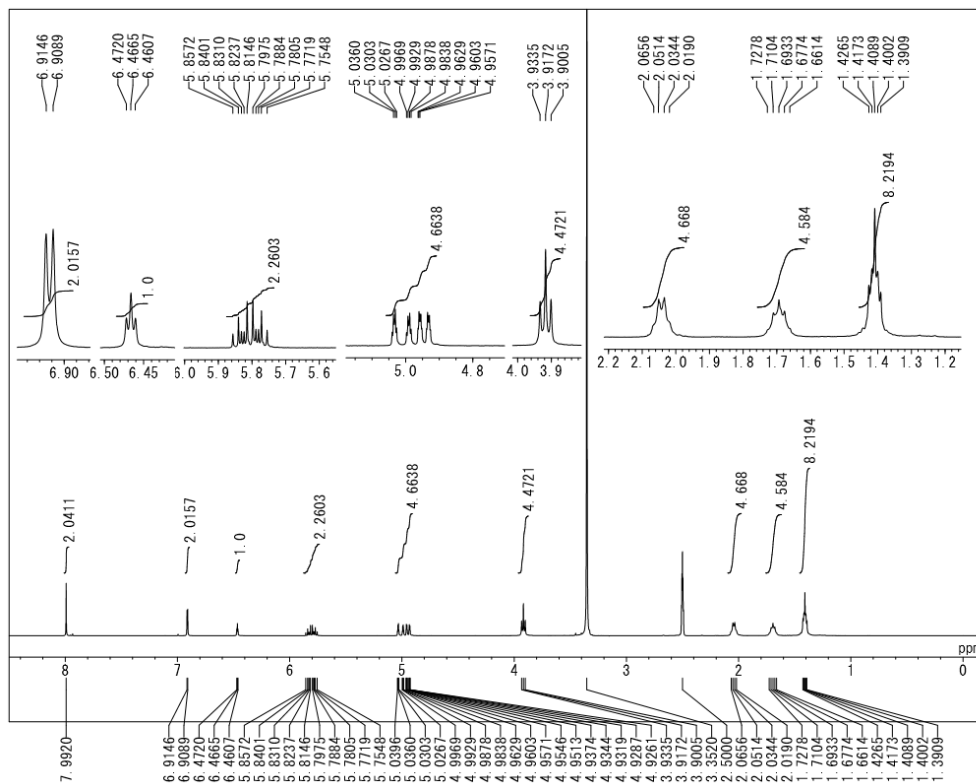

D:\Users\sator\OneDrive\修論データ\spectrol集\7 B(OH)2標\C7 B(OH)2標 1H DMSO (SO288).R  
 M1  
 DATIM 29/Sep/2019 19:31:39  
 COMNT  
 OBNUC <sup>1</sup>H  
 EXMOD ZG30  
 OBFRO 400.18 MHz  
 OBSET 0.0 kHz  
 OBFIN 10016.44 Hz  
 POINT 32768  
 FREQU 8223.685 Hz  
 SCANS 16  
 ACQTM 3.9846 s  
 IRNUC OFF  
 PROBD 5 MM PABBO BB-1H/D Z-GRD Z104450  
 INSTRUM SPECT  
 PULSPRG ZG30  
 GRDPRG  
 CTEMP 24.51 °C  
 SLVNT DMSO  
 BF 0.25 Hz  
 RGAIN 161

**<sup>1</sup>H NMR**

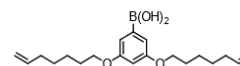

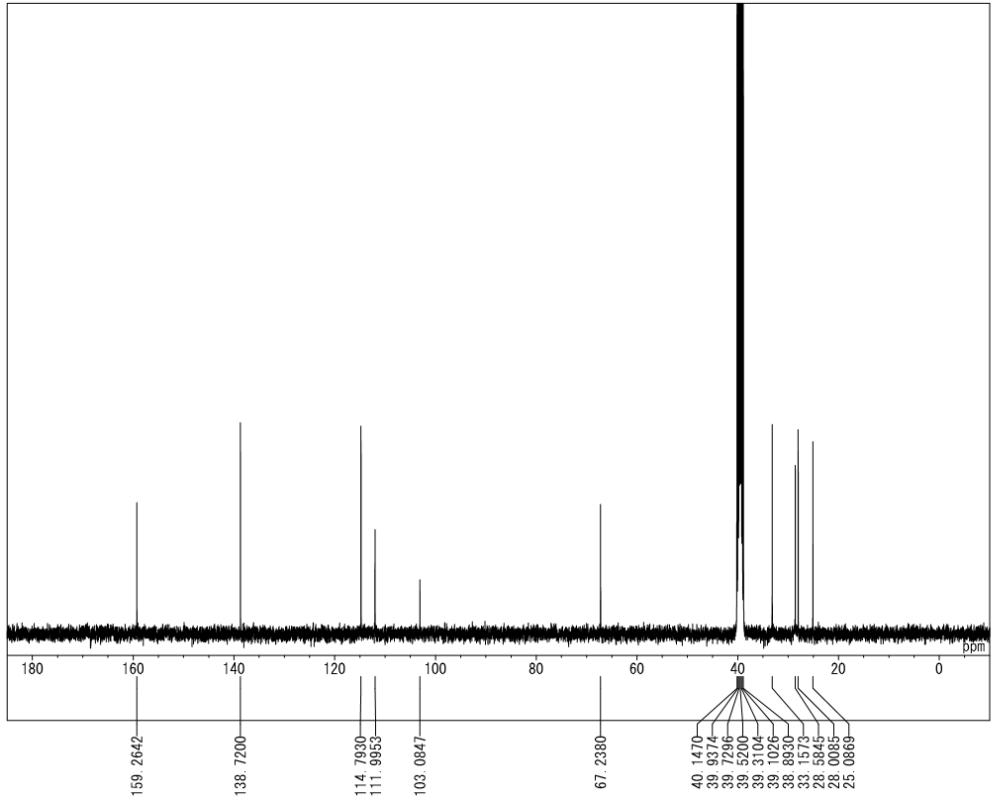

D:\FILE C:\USERS\ISATOR\IONEDRIVE\ 13C NMR  
 288) \$RM1  
 DATIM 30/Sep/2019 00:02:33  
 COMNT  
 OBNUC <sup>13</sup>C  
 EXMOD ZPG30  
 OBFREQ 100.63 MHz  
 OBSET 0.0 kHz  
 OBFIN 9999.211 Hz  
 POINT 32768  
 FREQU 24038.46 Hz  
 SCANS 2048  
 ACOTM 1.3631 s  
 IRNUC OFF  
 PROBHD 5 MM PABBO BB-1H/D Z-GRD Z104450  
 INSTRUM SPECT  
 PULSPRG ZPG30  
 GRDPRG  
 CTEMP 25.91 °C  
 SLVNT DMSO  
 BF 0.25 Hz  
 RGAIN 114

<sup>13</sup>C NMR

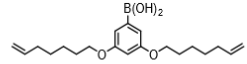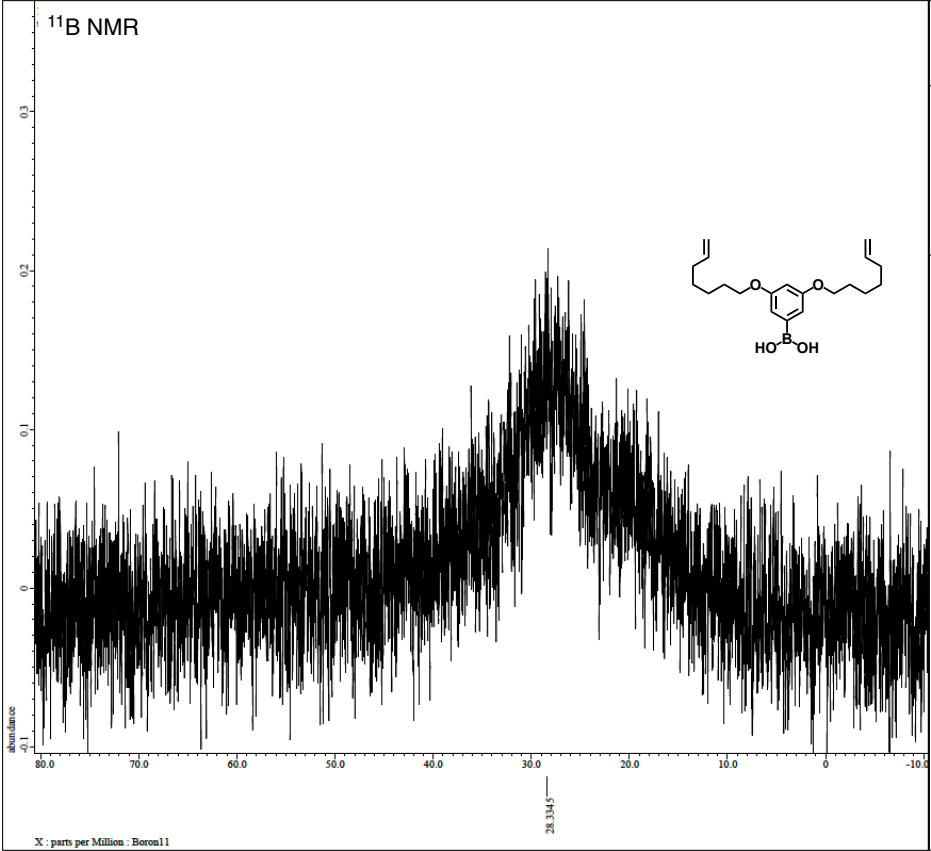

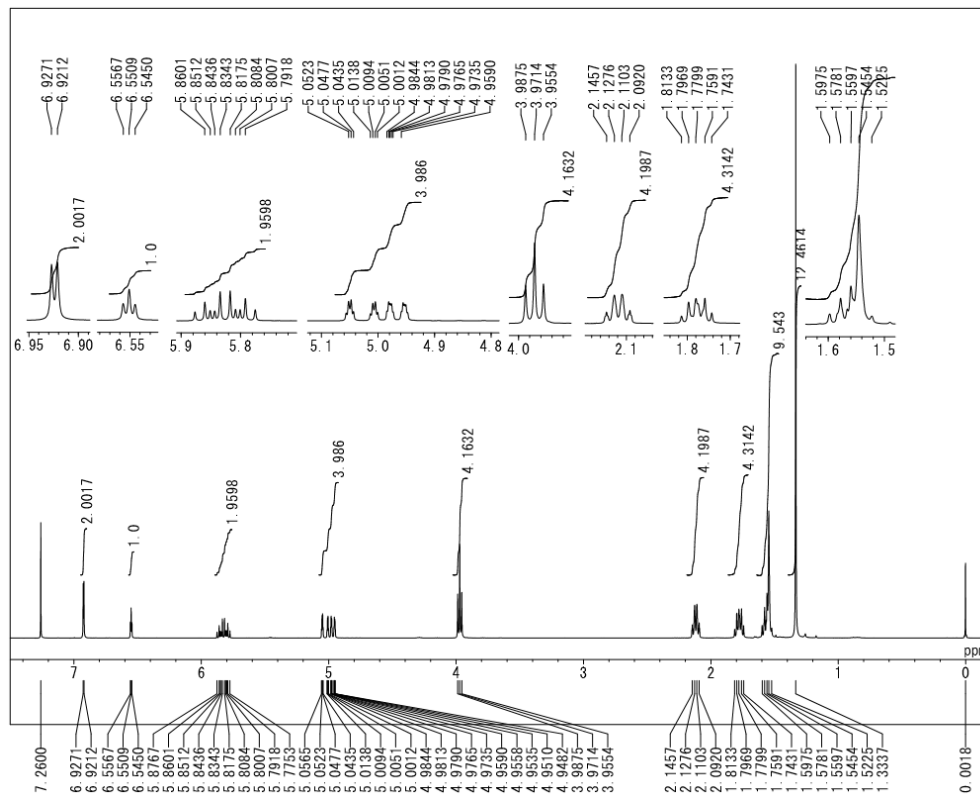

D:\Users\sator\OneDrive\修論子  
 ーナスベクトル集\IC6 Bpin\IC6 B  
 pin\1H.RM1  
 DATIM 01/Nov/2019 19:26:32  
 COMNT

OBNUC <sup>1</sup>H  
 EXMOD ZG30  
 OBFRQ 400.13 MHz  
 OBSET 0.0 kHz  
 OBFIN 10003.76 Hz  
 POINT 65536  
 FREQU 8196.722 Hz  
 SCANS 16  
 ACQTM 7.9954 s  
 IRNUC OFF  
 PROBHD Z163739\_0101 (PI HR-400  
 -S1-BBF/H  
 INSTRUM AVANCE  
 PULSPRG ZG30  
 GRDPRG  
 CTEMP 30.0035 °C  
 SLVNT CDCl<sub>3</sub>  
 BF 0.25 Hz  
 RGAIN 101

<sup>1</sup>H NMR

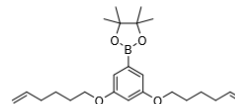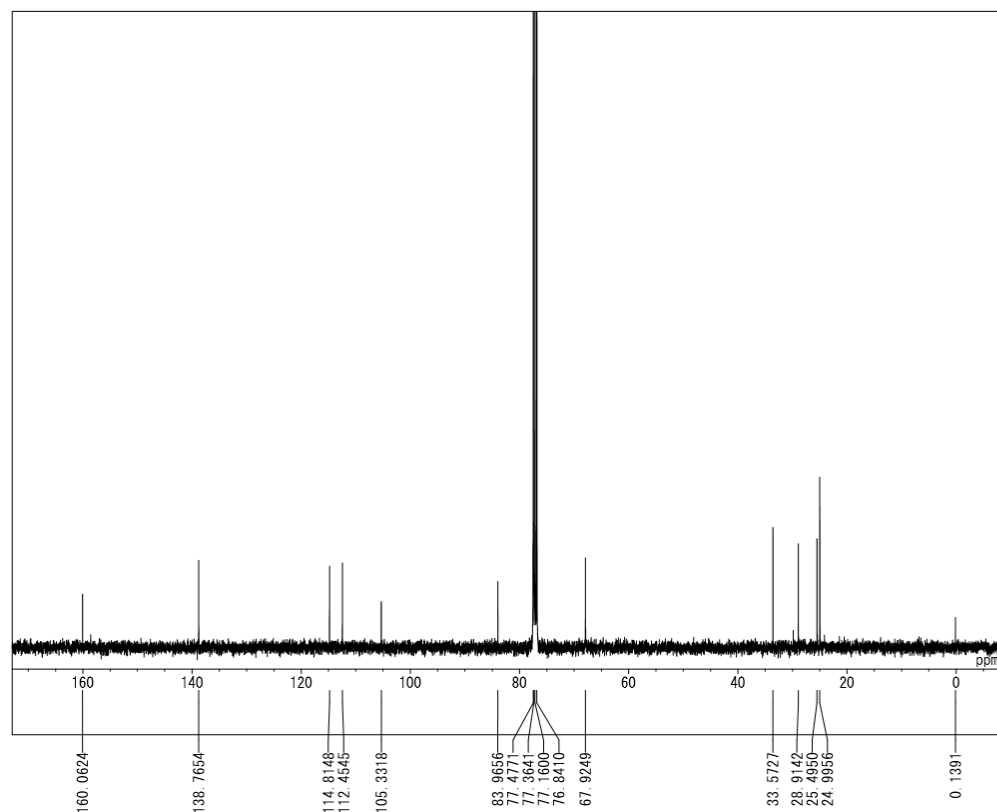

D:\Users\SATOR\ONEDRIVE\  
 修論子-ナスベクトル集\IC6 Bpin  
 \IC6 Bpin\13C.RM1  
 DATIM 21/Sep/2019 07:42:16  
 COMNT

OBNUC <sup>13</sup>C  
 EXMOD ZGPG30  
 OBFRQ 100.63 MHz  
 OBSET 0.0 kHz  
 OBFIN 9999.213 Hz  
 POINT 32768  
 FREQU 24038.46 Hz  
 SCANS 2048  
 ACQTM 1.3631 s  
 IRNUC OFF  
 PROBHD 5 MM PABBO BB-1H/D Z-  
 GRD Z104450  
 INSTRUM SPECT  
 PULSPRG ZGPG30  
 GRDPRG  
 CTEMP 26.01 °C  
 SLVNT CDCl<sub>3</sub>  
 BF 0.25 Hz  
 RGAIN 81

<sup>13</sup>C NMR

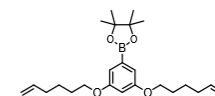

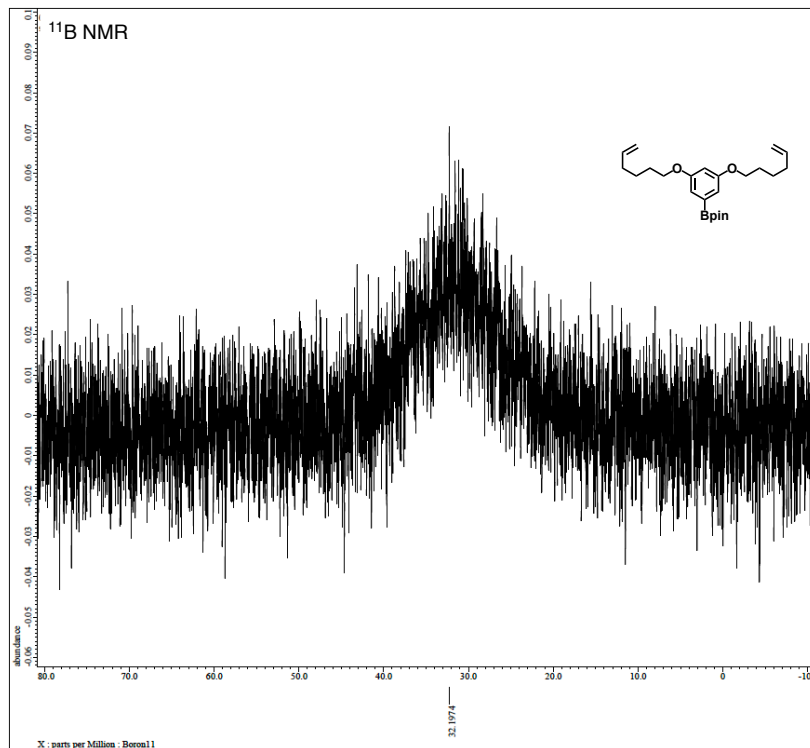

## 6. X-ray Crystallographic Analysis of **3c**

Single crystals of **3c** for X-ray diffraction analysis were obtained as colorless block by diffusion of toluene to a THF solution of the crude product of **3c**.

The single X-ray structure determination was performed on Rigaku RAPID (CuK $\alpha$  radiation,  $\lambda = 1.54187 \text{ \AA}$ ). A numerical absorption correction ( $\mu$ ) was applied. The structure was solved by direct methods and refined by the full-matrix least-squares method on  $F^2$  with anisotropic temperature factors for non-hydrogen atoms. All the hydrogen atoms were located at the calculated positions and refined with riding. The disordered alkylene chains of **3c** were restricted by DFIX and DELU. Crystallographic data collection and refinement information is listed in Table S1. CCDC reference number 2195814.

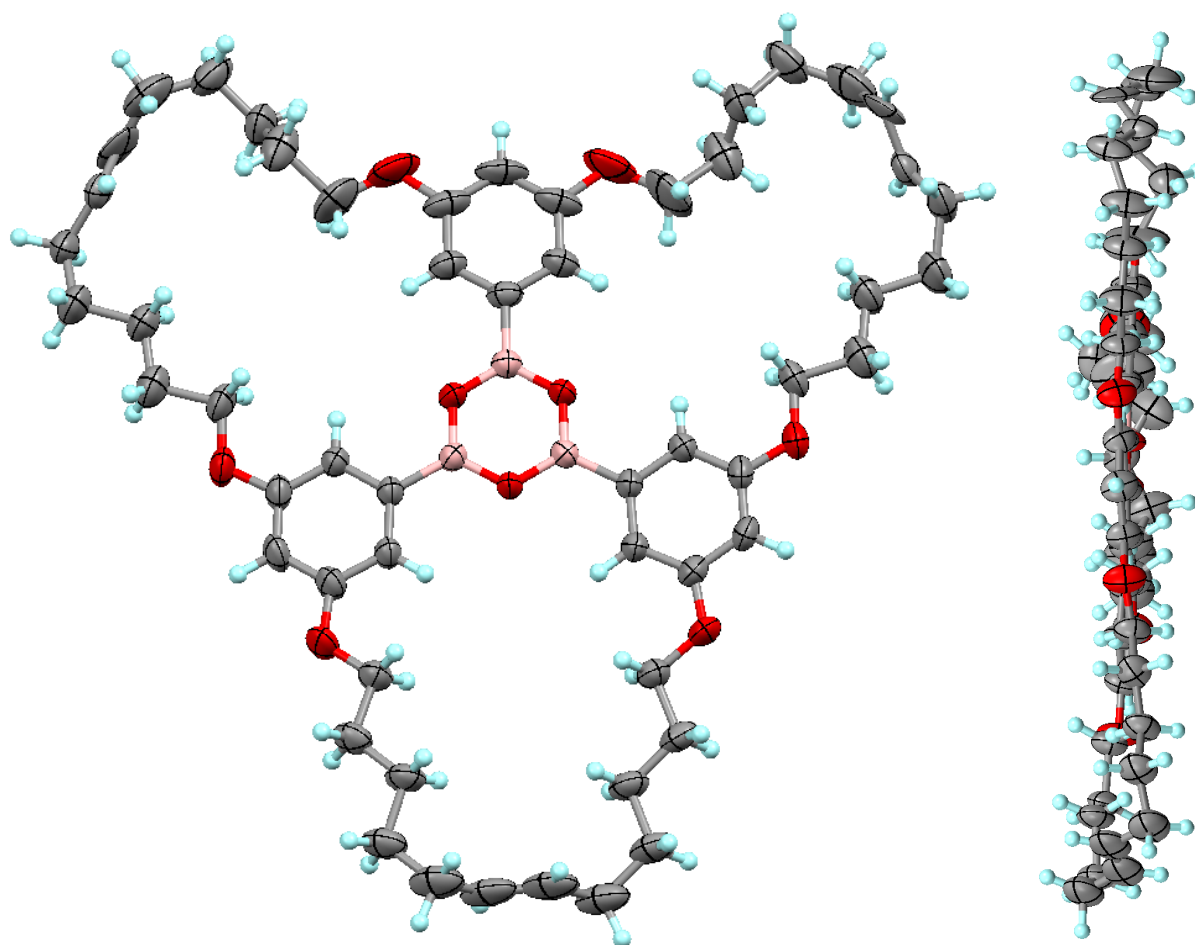



**Table S1. Crystal data and structure refinement for 3c**

|                                   |                                                                                                                                                                       |
|-----------------------------------|-----------------------------------------------------------------------------------------------------------------------------------------------------------------------|
| CCDC number                       | 2195814                                                                                                                                                               |
| Identification code               | 191002os                                                                                                                                                              |
| Empirical formula                 | C <sub>54</sub> H <sub>75</sub> B <sub>3</sub> O <sub>9</sub>                                                                                                         |
| Formula weight                    | 900.61                                                                                                                                                                |
| Temperature                       | 193 K                                                                                                                                                                 |
| Wavelength                        | 1.54187 Å                                                                                                                                                             |
| Crystal system                    | monoclinic                                                                                                                                                            |
| Space group                       | <i>C2/c</i>                                                                                                                                                           |
| Unit cell dimensions              | $a = 15.6791(3) \text{ \AA}$ $\alpha = 90^\circ$ .<br>$b = 19.9517(4) \text{ \AA}$ $\beta = 110.201(8)^\circ$ .<br>$c = 18.0668(3) \text{ \AA}$ $\gamma = 90^\circ$ . |
| Volume                            | 5304.1(3) Å <sup>3</sup>                                                                                                                                              |
| Z                                 | 4                                                                                                                                                                     |
| Density (calculated)              | 1.128 Mg/m <sup>3</sup>                                                                                                                                               |
| Absorption coefficient            | 0.587 mm <sup>-1</sup>                                                                                                                                                |
| F(000)                            | 1944.00                                                                                                                                                               |
| Crystal size                      | 0.30 x 0.30 x 0.15 mm <sup>3</sup>                                                                                                                                    |
| Theta range for data collection   | 3.73 to 68.30°.                                                                                                                                                       |
| Index ranges                      | -18 ≤ h ≤ 18, -24 ≤ k ≤ 24, -21 ≤ l ≤ 21                                                                                                                              |
| Reflections collected             | 30762                                                                                                                                                                 |
| Independent reflections           | 4866 [R(int) = 0.0566]                                                                                                                                                |
| Completeness to theta = 25.24°    | 99.8 %                                                                                                                                                                |
| Absorption correction             | multi-scan                                                                                                                                                            |
| Max. and min. transmission        | 0.916 and 0.632                                                                                                                                                       |
| Refinement method                 | Full-matrix least-squares on F <sup>2</sup>                                                                                                                           |
| Data / restraints / parameters    | 4866 / 36 / 381                                                                                                                                                       |
| Goodness-of-fit on F <sup>2</sup> | 1.054                                                                                                                                                                 |
| Final R indices [I > 2σ(I)]       | R <sub>1</sub> = 0.0830, wR <sub>2</sub> = 0.1690                                                                                                                     |
| R indices (all data)              | R <sub>1</sub> = 0.1492, wR <sub>2</sub> = 0.1976                                                                                                                     |
| Largest diff. peak and hole       | 0.24 and -0.19 e/Å <sup>-3</sup>                                                                                                                                      |

## 9. References

- S1) R. El-Haggag, K. Kamikawa, K. Machi, Z. Ye, Y. Ishino, T. Tsumuraya, I. Fujii, *Bioorg. Med. Chem. Lett.* **2010**, *20*, 1169–1172.
- S2) C. Simocko, T. C. Young, K. B. Wagener, *Macromolecules*, **2015**, *48*, 5470-5473.
